# Supplementary material
Source: MDPI journal article supplement (https://www.mdpi.com/2075-163X/8/6/248)
Supplement: s1 [file s1]

 
data_Fiemmeite
 
_audit_creation_method            'SHELXL-2017/1'
_shelx_SHELXL_version_number      '2017/1'
_chemical_name_systematic         ?
_chemical_name_common             ?
_chemical_melting_point           ?
_chemical_formula_moiety          ?
_chemical_formula_sum
 'C2 H6 Cu2 O8' 
_chemical_formula_weight          285.15

loop_
 _atom_type_symbol
 _atom_type_description
 _atom_type_scat_dispersion_real
 _atom_type_scat_dispersion_imag
 _atom_type_scat_source
 'C'  'C'   0.0033   0.0016
 'International Tables Vol C Tables 4.2.6.8 and 6.1.1.4'
 'Cu'  'Cu'   0.3201   1.2651
 'International Tables Vol C Tables 4.2.6.8 and 6.1.1.4'
 'H'  'H'   0.0000   0.0000
 'International Tables Vol C Tables 4.2.6.8 and 6.1.1.4'
 'O'  'O'   0.0106   0.0060
 'International Tables Vol C Tables 4.2.6.8 and 6.1.1.4'
 
_space_group_crystal_system       monoclinic
_space_group_IT_number            14
_space_group_name_H-M_alt         'P 21/c'
_space_group_name_Hall            '-P 2ybc'
 
_shelx_space_group_comment
;
The symmetry employed for this shelxl refinement is uniquely defined
by the following loop, which should always be used as a source of
symmetry information in preference to the above space-group names.
They are only intended as comments.
;
 
loop_
 _space_group_symop_operation_xyz
 'x, y, z'
 '-x, y+1/2, -z+1/2'
 '-x, -y, -z'
 'x, -y-1/2, z-1/2'
 
_cell_length_a                    3.4245(6)
_cell_length_b                    10.1413(17)
_cell_length_c                    19.397(3)
_cell_angle_alpha                 90
_cell_angle_beta                  90.710(10)
_cell_angle_gamma                 90
_cell_volume                      673.6(2)
_cell_formula_units_Z             4
_cell_measurement_temperature     292(2)
_cell_measurement_reflns_used     6788
_cell_measurement_theta_min       2.27
_cell_measurement_theta_max       31.55
 
_exptl_crystal_description        prism
_exptl_crystal_colour             'sky blue'
_exptl_crystal_density_meas       2.78(1)
_exptl_crystal_density_method     flotation
_exptl_crystal_density_diffrn     2.812          
_exptl_crystal_F_000              560
_exptl_transmission_factor_min    0.758
_exptl_transmission_factor_max    1.000
_exptl_crystal_size_max           0.10
_exptl_crystal_size_mid           0.05
_exptl_crystal_size_min           0.02
_exptl_absorpt_coefficient_mu     6.322
_shelx_estimated_absorpt_T_min    ?
_shelx_estimated_absorpt_T_max    ?
_exptl_absorpt_correction_type    empirical
_exptl_absorpt_correction_T_min   ?
_exptl_absorpt_correction_T_max   ?
_exptl_absorpt_process_details    SADABS
_exptl_absorpt_special_details    ?
_diffrn_ambient_temperature       292(2)
_diffrn_radiation_wavelength      0.71073
_diffrn_radiation_type            MoK\a
_diffrn_source                    ?
_diffrn_measurement_device_type   'APEX II CCD diffractometer'
_diffrn_measurement_method        'omega scan'
_diffrn_detector_area_resol_mean  ?
_diffrn_reflns_number             7512
_diffrn_reflns_av_unetI/netI      0.0199
_diffrn_reflns_av_R_equivalents   0.0294
_diffrn_reflns_limit_h_min        -5
_diffrn_reflns_limit_h_max        4
_diffrn_reflns_limit_k_min        -14
_diffrn_reflns_limit_k_max        14
_diffrn_reflns_limit_l_min        -28
_diffrn_reflns_limit_l_max        28
_diffrn_reflns_theta_min          2.100
_diffrn_reflns_theta_max          31.558
_diffrn_reflns_theta_full         25.242
_diffrn_measured_fraction_theta_max   0.949
_diffrn_measured_fraction_theta_full  0.996
_diffrn_reflns_Laue_measured_fraction_max    0.949
_diffrn_reflns_Laue_measured_fraction_full   0.996
_diffrn_reflns_point_group_measured_fraction_max   0.949
_diffrn_reflns_point_group_measured_fraction_full  0.996
_reflns_number_total              2118
_reflns_number_gt                 1942
_reflns_threshold_expression      'I > 2\s(I)'
_reflns_Friedel_coverage          0.000
_reflns_Friedel_fraction_max      .
_reflns_Friedel_fraction_full     .
 
_reflns_special_details
;
 Reflections were merged by SHELXL according to the crystal
 class for the calculation of statistics and refinement.
 
 _reflns_Friedel_fraction is defined as the number of unique
 Friedel pairs measured divided by the number that would be
 possible theoretically, ignoring centric projections and
 systematic absences.
;
 
_computing_data_collection        ?
_computing_cell_refinement        ?
_computing_data_reduction         ?
_computing_structure_solution     ?
_computing_structure_refinement 'SHELXL-2017/1 (Sheldrick, 2017)'
_computing_molecular_graphics     DIAMOND
_computing_publication_material   ?
_refine_special_details           ?
_refine_ls_structure_factor_coef  Fsqd
_refine_ls_matrix_type            full
_refine_ls_weighting_scheme       calc
_refine_ls_weighting_details
'w=1/[\s^2^(Fo^2^)+(0.0268P)^2^+3.8692P] where P=(Fo^2^+2Fc^2^)/3'
_atom_sites_solution_primary      ?
_atom_sites_solution_secondary    ?
_atom_sites_solution_hydrogens    difmap
_refine_ls_hydrogen_treatment     refall
_refine_ls_extinction_method      none
_refine_ls_extinction_coef        .
_refine_ls_number_reflns          2118
_refine_ls_number_parameters      133
_refine_ls_number_restraints      6
_refine_ls_R_factor_all           0.0434
_refine_ls_R_factor_gt            0.0386
_refine_ls_wR_factor_ref          0.0905
_refine_ls_wR_factor_gt           0.0882
_refine_ls_goodness_of_fit_ref    1.178
_refine_ls_restrained_S_all       1.176
_refine_ls_shift/su_max           0.000
_refine_ls_shift/su_mean          0.000
 
loop_
 _atom_site_label
 _atom_site_type_symbol
 _atom_site_fract_x
 _atom_site_fract_y
 _atom_site_fract_z
 _atom_site_U_iso_or_equiv
 _atom_site_adp_type
 _atom_site_occupancy
 _atom_site_site_symmetry_order  
 _atom_site_calc_flag
 _atom_site_refinement_flags_posn
 _atom_site_refinement_flags_adp
 _atom_site_refinement_flags_occupancy
 _atom_site_disorder_assembly
 _atom_site_disorder_group
Cu1 Cu 0.19372(13) 0.24133(4) 0.50020(2) 0.01262(11) Uani 1 1 d . . . . .
Cu2 Cu 0.61198(13) 0.29545(4) 0.37303(2) 0.01309(11) Uani 1 1 d . . . . .
C1 C 0.0211(11) 0.1394(3) 0.62677(17) 0.0130(6) Uani 1 1 d . . . . .
C2 C -0.1380(10) 0.2827(4) 0.62586(18) 0.0132(6) Uani 1 1 d . . . . .
O1 O 0.2069(8) 0.1067(3) 0.57309(13) 0.0160(5) Uani 1 1 d . . . . .
O2 O -0.1081(8) 0.3439(3) 0.56905(13) 0.0169(5) Uani 1 1 d . . . . .
O3 O -0.0369(9) 0.0695(3) 0.67728(14) 0.0228(6) Uani 1 1 d . . . . .
O4 O -0.2941(9) 0.3269(3) 0.67839(14) 0.0221(6) Uani 1 1 d . . . . .
OH5 O 0.6196(7) 0.1665(2) 0.44747(13) 0.0130(5) Uani 1 1 d D . . . .
OH6 O 0.1952(8) 0.3715(3) 0.42729(13) 0.0139(5) Uani 1 1 d D . . . .
OW7 O 0.9519(9) 0.1899(3) 0.31209(14) 0.0193(5) Uani 1 1 d D . . . .
OW8 O 0.5910(10) 0.4305(3) 0.30228(15) 0.0263(7) Uani 1 1 d D . . . .
H5 H 0.666(16) 0.0765(16) 0.441(3) 0.032(15) Uiso 1 1 d D . . . .
H6 H 0.182(16) 0.4626(13) 0.434(3) 0.026(14) Uiso 1 1 d D . . . .
H71 H 0.861(16) 0.193(6) 0.2664(11) 0.037(16) Uiso 1 1 d D . . . .
H72 H 0.932(19) 0.0986(14) 0.318(3) 0.046(18) Uiso 1 1 d D . . . .
H81 H 0.706(17) 0.423(7) 0.2589(15) 0.047(19) Uiso 1 1 d D . . . .
H82 H 0.504(15) 0.517(2) 0.309(3) 0.028(14) Uiso 1 1 d D . . . .
 
loop_
 _atom_site_aniso_label
 _atom_site_aniso_U_11
 _atom_site_aniso_U_22
 _atom_site_aniso_U_33
 _atom_site_aniso_U_23
 _atom_site_aniso_U_13
 _atom_site_aniso_U_12
Cu1 0.0151(2) 0.0118(2) 0.01106(19) 0.00217(14) 0.00295(14) 0.00301(15)
Cu2 0.0156(2) 0.0120(2) 0.01179(19) 0.00236(14) 0.00336(14) 0.00312(15)
C1 0.0148(15) 0.0107(14) 0.0137(14) -0.0003(11) 0.0008(11) 0.0013(12)
C2 0.0096(14) 0.0151(15) 0.0149(15) -0.0014(12) -0.0002(11) 0.0009(12)
O1 0.0211(13) 0.0124(12) 0.0147(11) 0.0011(9) 0.0044(9) 0.0056(10)
O2 0.0236(14) 0.0124(12) 0.0147(11) 0.0019(9) 0.0056(9) 0.0053(10)
O3 0.0360(17) 0.0152(13) 0.0175(13) 0.0055(10) 0.0091(11) 0.0069(12)
O4 0.0328(16) 0.0182(13) 0.0155(12) -0.0012(10) 0.0075(11) 0.0090(12)
OH5 0.0149(12) 0.0097(11) 0.0145(11) 0.0019(9) 0.0029(9) 0.0042(9)
OH6 0.0159(12) 0.0116(11) 0.0144(11) 0.0026(9) 0.0034(9) 0.0033(9)
OW7 0.0301(15) 0.0139(12) 0.0141(12) -0.0007(9) 0.0045(10) 0.0041(11)
OW8 0.0406(18) 0.0192(14) 0.0194(13) 0.0079(11) 0.0132(12) 0.0133(13)
 
_geom_special_details
;
 All esds (except the esd in the dihedral angle between two l.s. planes)
 are estimated using the full covariance matrix.  The cell esds are taken
 into account individually in the estimation of esds in distances, angles
 and torsion angles; correlations between esds in cell parameters are only
 used when they are defined by crystal symmetry.  An approximate (isotropic)
 treatment of cell esds is used for estimating esds involving l.s. planes.
;
 
loop_
 _geom_bond_atom_site_label_1
 _geom_bond_atom_site_label_2
 _geom_bond_distance
 _geom_bond_site_symmetry_2
 _geom_bond_publ_flag
Cu1 OH6 1.935(3) . ?
Cu1 OH5 1.946(2) . ?
Cu1 O1 1.966(3) . ?
Cu1 O2 1.992(3) . ?
Cu1 OH5 2.332(3) 1_455 ?
Cu1 Cu2 2.9198(7) . ?
Cu2 OW8 1.939(3) . ?
Cu2 OH6 1.943(3) . ?
Cu2 OH5 1.948(2) . ?
Cu2 OW7 1.983(3) . ?
Cu2 OH6 2.375(3) 1_655 ?
C1 O3 1.228(4) . ?
C1 O1 1.271(4) . ?
C1 C2 1.552(5) . ?
C2 O4 1.240(4) . ?
C2 O2 1.270(4) . ?
 
loop_
 _geom_angle_atom_site_label_1
 _geom_angle_atom_site_label_2
 _geom_angle_atom_site_label_3
 _geom_angle
 _geom_angle_site_symmetry_1
 _geom_angle_site_symmetry_3
 _geom_angle_publ_flag
OH6 Cu1 OH5 82.70(11) . . ?
OH6 Cu1 O1 178.23(11) . . ?
OH5 Cu1 O1 95.54(10) . . ?
OH6 Cu1 O2 98.04(11) . . ?
OH5 Cu1 O2 162.67(12) . . ?
O1 Cu1 O2 83.57(11) . . ?
OH6 Cu1 OH5 84.91(10) . 1_455 ?
OH5 Cu1 OH5 106.01(11) . 1_455 ?
O1 Cu1 OH5 95.80(11) . 1_455 ?
O2 Cu1 OH5 91.28(11) . 1_455 ?
OH6 Cu1 Cu2 41.27(8) . . ?
OH5 Cu1 Cu2 41.45(7) . . ?
O1 Cu1 Cu2 136.98(8) . . ?
O2 Cu1 Cu2 137.08(8) . . ?
OH5 Cu1 Cu2 96.34(6) 1_455 . ?
OW8 Cu2 OH6 94.70(11) . . ?
OW8 Cu2 OH5 176.90(11) . . ?
OH6 Cu2 OH5 82.42(10) . . ?
OW8 Cu2 OW7 88.63(12) . . ?
OH6 Cu2 OW7 167.84(13) . . ?
OH5 Cu2 OW7 94.42(11) . . ?
OW8 Cu2 OH6 96.19(13) . 1_655 ?
OH6 Cu2 OH6 104.50(11) . 1_655 ?
OH5 Cu2 OH6 83.46(10) . 1_655 ?
OW7 Cu2 OH6 86.71(11) . 1_655 ?
OW8 Cu2 Cu1 135.75(9) . . ?
OH6 Cu2 Cu1 41.04(7) . . ?
OH5 Cu2 Cu1 41.39(7) . . ?
OW7 Cu2 Cu1 134.43(8) . . ?
OH6 Cu2 Cu1 96.05(6) 1_655 . ?
O3 C1 O1 126.2(3) . . ?
O3 C1 C2 119.3(3) . . ?
O1 C1 C2 114.5(3) . . ?
O4 C2 O2 125.2(3) . . ?
O4 C2 C1 118.9(3) . . ?
O2 C2 C1 115.8(3) . . ?
C1 O1 Cu1 113.6(2) . . ?
C2 O2 Cu1 112.0(2) . . ?
Cu1 OH5 Cu2 97.16(11) . . ?
Cu1 OH5 Cu1 106.01(11) . 1_655 ?
Cu2 OH5 Cu1 96.32(11) . 1_655 ?
Cu1 OH6 Cu2 97.69(11) . . ?
Cu1 OH6 Cu2 95.31(11) . 1_455 ?
Cu2 OH6 Cu2 104.50(11) . 1_455 ?
 
loop_
 _geom_hbond_atom_site_label_D 
 _geom_hbond_atom_site_label_H 
 _geom_hbond_atom_site_label_A 
 _geom_hbond_distance_DH 
 _geom_hbond_distance_HA 
 _geom_hbond_distance_DA 
 _geom_hbond_angle_DHA 
 _geom_hbond_site_symmetry_A 
 _geom_hbond_publ_flag
OH5 H5 O1  0.937(10) 1.926(11) 2.862(4) 177(5) 3_656 yes
OH6 H6 O2  0.935(10) 1.979(15) 2.903(4) 169(5) 3_566 yes
OW7 H71 O4  0.937(10) 1.793(15) 2.722(4) 171(6) 4_665 yes
OW7 H72 O3  0.937(10) 1.74(2) 2.655(4) 163(6) 3_656 yes
OW8 H81 O3  0.936(10) 1.824(15) 2.753(4) 172(6) 4_665 yes
OW8 H82 O4  0.935(10) 1.759(12) 2.691(4) 175(5) 3_566 yes
 
_refine_diff_density_max    1.374
_refine_diff_density_min   -0.730
_refine_diff_density_rms    0.165

_shelx_res_file
;
TITL FIEMMEITE2 in P2(1)/c
    shelx.res
    created by SHELXL-2017/1 at 13:12:57 on 21-May-2018
CELL  0.71073   3.4245  10.1413  19.3972   90.000   90.710   90.000
ZERR     4.00   0.0006   0.0017   0.0033    0.000    0.010    0.000
LATT   1
SYMM  - X, 1/2 + Y, 1/2 - Z
SFAC  C    CU   H    O
UNIT  8    8    24   32
MERG   2
FMAP   2
PLAN   25
ACTA
DFIX 0.94 0.01 OH5 H5 OH6 H6 Ow7 H71 Ow7 H72 Ow8 H81 Ow8 H82
EQIV $3 -x+1, -y, -z+1
HTAB OH5 O1_$3
EQIV $4 -x, -y+1, -z+1
HTAB OH6 O2_$4
EQIV $5 x+1, -y+1/2, z-1/2
HTAB Ow7 O4_$5
HTAB Ow7 O3_$3
HTAB Ow8 O3_$5
HTAB Ow8 O4_$4
L.S.   4
WGHT    0.026800    3.869200
FVAR       0.24256
CU1   2    0.193721    0.241327    0.500198    11.00000    0.01508    0.01178 =
         0.01106    0.00217    0.00295    0.00301
CU2   2    0.611982    0.295448    0.373030    11.00000    0.01558    0.01197 =
         0.01179    0.00236    0.00336    0.00312
C1    1    0.021108    0.139448    0.626774    11.00000    0.01475    0.01066 =
         0.01372   -0.00027    0.00081    0.00126
C2    1   -0.137960    0.282704    0.625862    11.00000    0.00956    0.01506 =
         0.01495   -0.00135   -0.00021    0.00086
O1    4    0.206854    0.106686    0.573089    11.00000    0.02106    0.01242 =
         0.01466    0.00111    0.00438    0.00558
O2    4   -0.108062    0.343906    0.569050    11.00000    0.02361    0.01238 =
         0.01470    0.00190    0.00562    0.00534
O3    4   -0.036917    0.069467    0.677275    11.00000    0.03603    0.01518 =
         0.01751    0.00547    0.00906    0.00693
O4    4   -0.294128    0.326858    0.678392    11.00000    0.03279    0.01816 =
         0.01546   -0.00116    0.00752    0.00901
OH5   4    0.619573    0.166500    0.447466    11.00000    0.01487    0.00975 =
         0.01447    0.00187    0.00294    0.00419
OH6   4    0.195246    0.371488    0.427290    11.00000    0.01595    0.01159 =
         0.01437    0.00263    0.00337    0.00333
OW7   4    0.951932    0.189945    0.312093    11.00000    0.03013    0.01388 =
         0.01412   -0.00075    0.00453    0.00415
OW8   4    0.591023    0.430489    0.302285    11.00000    0.04059    0.01924 =
         0.01940    0.00790    0.01323    0.01325
H5    3    0.666356    0.076453    0.440508    11.00000    0.03151
H6    3    0.181506    0.462598    0.434346    11.00000    0.02597
H71   3    0.860529    0.193450    0.266421    11.00000    0.03665
H72   3    0.932477    0.098610    0.318332    11.00000    0.04585
H81   3    0.705865    0.422768    0.258934    11.00000    0.04684
H82   3    0.503522    0.516818    0.308881    11.00000    0.02833
HKLF    4


REM  FIEMMEITE2 in P2(1)/c
REM R1 =  0.0386 for    1942 Fo > 4sig(Fo)  and  0.0434 for all    2118 data
REM    133 parameters refined using      6 restraints

END

WGHT      0.0268      3.8694

REM Highest difference peak  1.374,  deepest hole -0.730,  1-sigma level  0.165
Q1    1   0.1551  0.2395  0.5488  11.00000  0.05    1.37
Q2    1   0.6006  0.2971  0.4190  11.00000  0.05    1.33
Q3    1   0.2162  0.2420  0.4551  11.00000  0.05    1.24
Q4    1   0.6541  0.2925  0.3276  11.00000  0.05    1.20
Q5    1   0.7919  0.2101  0.3378  11.00000  0.05    0.70
Q6    1  -0.0366  0.2243  0.6256  11.00000  0.05    0.62
Q7    1   0.7706  0.2014  0.3794  11.00000  0.05    0.60
Q8    1   0.2362  0.2582  0.3804  11.00000  0.05    0.59
Q9    1  -0.1552  0.3030  0.6583  11.00000  0.05    0.58
Q10   1   0.7273  0.1630  0.3819  11.00000  0.05    0.57
Q11   1   0.8301  0.3022  0.3716  11.00000  0.05    0.57
Q12   1   0.6742  0.2828  0.4945  11.00000  0.05    0.56
Q13   1  -0.3313  0.2836  0.6292  11.00000  0.05    0.56
Q14   1   0.7804  0.2201  0.3965  11.00000  0.05    0.54
Q15   1   0.0807  0.3449  0.5745  11.00000  0.05    0.54
Q16   1   0.3848  0.1592  0.4416  11.00000  0.05    0.54
Q17   1   0.6096  0.3775  0.3711  11.00000  0.05    0.49
Q18   1   0.4388  0.3408  0.4982  11.00000  0.05    0.48
Q19   1   0.5733  0.3774  0.3276  11.00000  0.05    0.47
Q20   1   0.7340  0.1730  0.4809  11.00000  0.05    0.47
Q21   1   0.7278  0.2866  0.2433  11.00000  0.05    0.47
Q22   1   0.7039  0.2770  0.2923  11.00000  0.05    0.47
Q23   1   0.1085  0.1140  0.5986  11.00000  0.05    0.46
Q24   1   1.2208  0.2969  0.3267  11.00000  0.05    0.46
Q25   1   0.7519  0.1734  0.2988  11.00000  0.05    0.45
;
_shelx_res_checksum   88005

_shelx_hkl_file
;
   0  -2 -28    1.00    1.07
   0  -1 -28    2.69    1.13
   0  -2 -27    5.76    1.11
   0  -1 -27    3.85    1.09
  -1   0 -27    2.62    0.72
   0   0 -27    1.68    1.08
  -1   1 -27    5.42    0.76
   0   1 -27    3.98    1.19
  -1   2 -27    9.68    1.31
   0   2 -27    5.02    1.19
   1  -5 -26   22.25    1.65
   0  -4 -26   19.79    1.55
   1  -4 -26    8.60    1.21
   0  -3 -26    4.49    1.04
   1  -3 -26    6.62    1.17
  -1  -2 -26    3.01    1.03
   0  -2 -26   24.88    1.62
   1  -2 -26   84.83    2.24
  -1  -1 -26  222.15    2.92
   0  -1 -26   46.18    1.82
   1  -1 -26    9.51    1.28
  -1   0 -26    4.29    0.71
   0   0 -26   35.02    1.78
   1   0 -26  128.73    2.58
  -2   1 -26    1.99    0.98
  -1   1 -26  219.23    1.98
   0   1 -26   50.10    1.92
   1   1 -26    8.29    1.29
  -1   2 -26    7.10    1.18
   0   2 -26   27.63    1.73
   1   2 -26   90.90    2.38
  -1   3 -26   98.32    2.36
   0   3 -26    6.18    1.25
   1   3 -26    8.76    1.38
   0   4 -26   27.93    1.80
   0  -5 -25    0.36    1.04
   1  -5 -25    1.45    0.99
  -1  -4 -25    0.85    0.98
   0  -4 -25   39.07    1.79
   1  -4 -25   23.67    1.65
  -1  -3 -25   34.56    1.73
   0  -3 -25    1.08    0.69
   1  -3 -25    2.92    1.04
  -1  -2 -25    5.47    1.09
   0  -2 -25   11.98    1.46
   1  -2 -25    5.70    1.14
  -2  -1 -25    1.63    0.94
  -1  -1 -25   10.92    1.35
   0  -1 -25    4.95    1.05
   1  -1 -25    3.84    1.12
  -2   0 -25    0.72    0.85
  -1   0 -25    0.98    0.64
   0   0 -25    2.81    1.02
   1   0 -25    0.71    1.04
  -2   1 -25    1.01    0.86
  -1   1 -25   13.82    1.08
   0   1 -25    3.65    1.04
   1   1 -25    3.43    1.14
  -1   2 -25    5.60    0.75
   0   2 -25   12.85    1.59
   1   2 -25    6.83    1.24
  -2   3 -25   17.40    1.65
  -1   3 -25   39.86    1.79
   0   3 -25    2.97    1.10
   1   3 -25    3.26    1.19
  -1   4 -25    3.09    1.10
   0   4 -25   44.69    2.00
   1   4 -25   25.28    1.88
   0   5 -25    3.67    1.23
   0  -7 -24    1.09    1.10
  -1  -6 -24   19.83    1.79
   0  -6 -24   44.89    1.90
   1  -6 -24    4.53    1.07
  -1  -5 -24   24.64    1.64
   0  -5 -24    2.64    1.08
   1  -5 -24   19.49    1.56
  -1  -4 -24    1.33    1.00
   0  -4 -24  114.86    2.32
   1  -4 -24    1.24    0.96
  -2  -3 -24   30.91    1.69
  -1  -3 -24   21.67    1.50
   0  -3 -24    8.74    0.78
   1  -3 -24    6.50    1.08
   2  -3 -24  103.44    2.44
  -2  -2 -24    8.49    1.15
  -1  -2 -24   16.46    1.40
   0  -2 -24  201.94    1.87
   1  -2 -24    0.39    0.98
   2  -2 -24   46.31    2.02
  -2  -1 -24   73.54    1.95
  -1  -1 -24   25.73    1.03
   0  -1 -24    4.19    0.98
   1  -1 -24    1.31    1.03
   2  -1 -24  148.41    2.74
  -2   0 -24    7.63    1.09
  -1   0 -24   15.27    0.95
   0   0 -24  242.86    2.90
   1   0 -24    4.44    1.11
   2   0 -24   30.50    1.90
  -2   1 -24   70.95    1.77
  -1   1 -24   27.36    1.08
   0   1 -24    3.50    1.01
   1   1 -24    1.61    1.04
   2   1 -24  151.12    2.80
  -2   2 -24   16.77    1.52
  -1   2 -24   17.76    0.99
   0   2 -24  208.20    2.83
   1   2 -24    0.37    1.04
   2   2 -24   43.92    2.12
  -2   3 -24   40.21    2.00
  -1   3 -24   23.90    1.66
   0   3 -24    9.54    1.20
   1   3 -24    5.79    1.24
   2   3 -24  102.59    2.53
  -2   4 -24   25.87    1.91
  -1   4 -24    3.11    1.12
   0   4 -24  122.81    2.55
   1   4 -24    1.46    1.14
  -1   5 -24   32.95    1.90
   0   5 -24    5.59    1.20
   1   5 -24   21.48    1.83
   0   6 -24   53.25    2.11
   1   6 -24    6.85    1.30
   0  -8 -23    2.91    1.12
  -1  -7 -23    2.57    1.08
   0  -7 -23   15.94    1.55
  -1  -6 -23   70.90    2.04
   0  -6 -23    5.46    1.11
   1  -6 -23   11.89    1.45
  -1  -5 -23    1.02    0.92
   0  -5 -23   45.92    1.76
   1  -5 -23   82.52    1.98
   2  -5 -23   35.44    1.88
  -2  -4 -23   21.72    1.58
  -1  -4 -23   76.22    1.94
   0  -4 -23   35.85    1.07
   1  -4 -23   27.49    1.57
   2  -4 -23   12.03    1.35
  -2  -3 -23   18.50    1.51
  -1  -3 -23   11.63    1.35
   0  -3 -23   18.49    0.98
   1  -3 -23   53.65    1.79
   2  -3 -23   38.84    1.89
  -2  -2 -23    3.52    1.03
  -1  -2 -23   25.23    1.44
   0  -2 -23   49.93    1.15
   1  -2 -23    1.58    0.98
   2  -2 -23   14.91    1.65
  -2  -1 -23   15.00    1.40
  -1  -1 -23   10.58    0.82
   0  -1 -23    1.23    0.62
   1  -1 -23    6.85    1.08
   2  -1 -23    5.36    1.19
  -2   0 -23    1.74    0.91
  -1   0 -23    1.73    0.60
   0   0 -23    1.64    0.89
   1   0 -23    0.11    0.94
   2   0 -23    0.79    1.04
  -2   1 -23   14.00    1.25
  -1   1 -23    9.40    0.80
   0   1 -23    3.31    0.97
   1   1 -23    6.85    1.11
   2   1 -23    4.28    1.18
  -2   2 -23    4.64    0.65
  -1   2 -23   25.93    0.98
   0   2 -23   48.96    1.73
   1   2 -23    1.52    1.04
   2   2 -23   16.08    1.77
  -2   3 -23   27.10    1.82
  -1   3 -23   14.36    1.15
   0   3 -23   21.62    1.69
   1   3 -23   56.86    1.99
   2   3 -23   37.66    1.96
  -2   4 -23   32.19    1.87
  -1   4 -23   81.06    2.12
   0   4 -23   38.06    1.82
   1   4 -23   28.31    1.78
   2   4 -23   12.40    1.43
  -2   5 -23    6.39    1.22
  -1   5 -23    4.29    1.22
   0   5 -23   50.67    1.95
   1   5 -23   86.11    2.31
   2   5 -23   35.16    1.95
  -1   6 -23   82.50    2.36
   0   6 -23    7.16    1.23
   1   6 -23   15.99    1.86
   0   7 -23   22.03    1.97
   1   7 -23   31.04    1.90
   0  -9 -22   13.29    1.40
  -1  -8 -22    1.23    1.06
   0  -8 -22    5.67    1.15
  -1  -7 -22   56.17    1.94
   0  -7 -22    1.19    1.02
   1  -7 -22   14.86    1.56
  -1  -6 -22   16.88    1.53
   0  -6 -22   35.49    1.68
   1  -6 -22   20.17    1.45
   2  -6 -22   17.18    1.70
  -2  -5 -22   14.74    1.51
  -1  -5 -22   48.32    1.76
   0  -5 -22    3.44    0.97
   1  -5 -22   75.63    1.86
   2  -5 -22    6.81    1.19
  -2  -4 -22   83.78    2.09
  -1  -4 -22   18.67    1.40
   0  -4 -22  134.58    1.50
   1  -4 -22    2.32    0.91
   2  -4 -22    6.79    1.18
  -2  -3 -22   61.21    1.86
  -1  -3 -22   11.99    1.30
   0  -3 -22   47.61    1.09
   1  -3 -22  164.44    2.40
   2  -3 -22   41.53    1.83
  -2  -2 -22  126.34    2.24
  -1  -2 -22   10.82    1.20
   0  -2 -22  161.69    1.61
   1  -2 -22    8.35    1.07
   2  -2 -22    1.58    1.03
  -3  -1 -22    4.06    1.09
  -2  -1 -22   42.03    1.61
  -1  -1 -22    9.67    0.75
   0  -1 -22   13.37    0.90
   1  -1 -22  156.21    2.38
   2  -1 -22   65.26    2.01
  -3   0 -22    4.50    1.05
  -2   0 -22   97.50    1.97
  -1   0 -22   14.45    0.87
   0   0 -22  143.75    2.21
   1   0 -22    1.08    0.91
   2   0 -22   13.41    1.58
  -2   1 -22   39.54    1.49
  -1   1 -22    9.20    0.74
   0   1 -22   14.39    1.41
   1   1 -22  154.07    2.46
   2   1 -22   64.49    2.05
  -2   2 -22  128.24    1.97
  -1   2 -22   11.69    0.85
   0   2 -22  166.17    2.45
   1   2 -22    6.79    1.11
   2   2 -22    2.51    1.14
  -2   3 -22   66.93    2.02
  -1   3 -22   12.42    0.87
   0   3 -22   51.79    1.85
   1   3 -22  162.48    2.60
   2   3 -22   39.44    1.91
  -2   4 -22   86.08    2.24
  -1   4 -22   23.97    1.79
   0   4 -22  133.35    2.35
   1   4 -22    2.16    1.05
   2   4 -22    6.51    1.24
  -2   5 -22   23.35    1.82
  -1   5 -22   53.20    2.08
   0   5 -22    5.30    1.10
   1   5 -22   82.27    2.24
   2   5 -22    7.66    1.31
  -2   6 -22   20.20    1.82
  -1   6 -22   23.67    1.82
   0   6 -22   43.00    2.02
   1   6 -22   24.44    1.79
   2   6 -22   19.09    1.80
  -1   7 -22   60.30    2.09
   0   7 -22    3.09    1.21
   1   7 -22   23.37    1.85
   2   7 -22    1.91    1.19
   0   8 -22    8.63    1.37
   1   8 -22   17.51    1.82
  -1  -9 -21    2.29    1.11
   0  -9 -21   12.66    1.54
  -1  -8 -21   21.25    1.57
   0  -8 -21   12.02    1.27
  -1  -7 -21   10.25    1.17
   0  -7 -21   22.19    1.54
   1  -7 -21    5.03    0.97
   2  -7 -21   22.94    1.65
  -2  -6 -21   10.73    1.25
  -1  -6 -21   25.07    1.50
   0  -6 -21   25.05    1.52
   1  -6 -21   35.81    1.53
   2  -6 -21   24.73    1.72
  -2  -5 -21   37.16    1.67
  -1  -5 -21   23.16    1.44
   0  -5 -21   98.17    2.05
   1  -5 -21    8.13    1.01
   2  -5 -21   59.54    1.95
  -2  -4 -21   11.22    1.39
  -1  -4 -21   18.16    1.33
   0  -4 -21   37.06    1.00
   1  -4 -21  101.80    1.96
   2  -4 -21   36.20    1.73
  -2  -3 -21   31.24    1.54
  -1  -3 -21   10.96    1.25
   0  -3 -21   94.42    1.28
   1  -3 -21    3.62    0.90
   2  -3 -21   38.65    1.76
  -3  -2 -21   24.32    1.59
  -2  -2 -21    1.01    0.85
  -1  -2 -21    2.87    0.53
   0  -2 -21   32.25    0.97
   1  -2 -21   13.99    1.35
   2  -2 -21   16.83    1.52
   3  -2 -21    3.40    1.29
  -3  -1 -21    4.82    1.04
  -2  -1 -21    2.72    0.88
  -1  -1 -21    2.06    0.50
   0  -1 -21    6.87    0.66
   1  -1 -21    1.74    0.87
   2  -1 -21    3.89    1.03
   3  -1 -21    2.20    1.22
  -3   0 -21    1.25    0.92
  -2   0 -21    0.62    0.80
  -1   0 -21    1.01    0.51
   0   0 -21   -1.07    0.53
   1   0 -21    0.81    0.86
   2   0 -21    0.64    0.98
   3   0 -21    1.25    1.17
  -3   1 -21    3.42    1.00
  -2   1 -21    3.97    0.63
  -1   1 -21    2.42    0.53
   0   1 -21    7.87    0.97
   1   1 -21    1.74    0.91
   2   1 -21    2.32    1.06
   3   1 -21    3.26    1.23
  -2   2 -21    3.66    0.81
  -1   2 -21    3.50    0.56
   0   2 -21   30.47    1.60
   1   2 -21   12.61    1.19
   2   2 -21   16.18    1.60
   3   2 -21    2.31    1.17
  -2   3 -21   38.16    1.77
  -1   3 -21   12.86    1.01
   0   3 -21   94.06    2.02
   1   3 -21    3.05    0.98
   2   3 -21   36.96    1.85
   3   3 -21   21.34    1.84
  -2   4 -21   19.22    1.72
  -1   4 -21   24.92    1.69
   0   4 -21   40.54    1.69
   1   4 -21  105.04    2.24
   2   4 -21   34.85    1.82
   3   4 -21   19.53    1.77
  -2   5 -21   44.60    1.94
  -1   5 -21   24.87    1.71
   0   5 -21  101.28    2.23
   1   5 -21    9.05    1.18
   2   5 -21   55.48    2.05
  -2   6 -21   15.92    1.83
  -1   6 -21   30.76    1.82
   0   6 -21   31.53    1.84
   1   6 -21   37.53    1.86
   2   6 -21   26.83    1.81
  -1   7 -21   15.93    1.69
   0   7 -21   29.08    1.89
   1   7 -21    8.98    1.28
   2   7 -21   28.76    1.91
  -1   8 -21   25.85    1.80
   0   8 -21   19.16    1.95
   1   8 -21   11.23    1.34
   2   8 -21    8.44    1.29
   0   9 -21   21.09    1.96
   1   9 -21    5.49    1.25
  -1  -9 -20    3.83    1.05
   0  -9 -20    2.92    1.05
  -1  -8 -20    3.19    0.99
   0  -8 -20   84.35    2.07
   2  -8 -20   12.54    1.28
  -2  -7 -20   14.01    1.45
  -1  -7 -20    1.72    0.92
   0  -7 -20    2.31    0.95
   1  -7 -20   13.54    1.33
   2  -7 -20   41.85    1.78
  -2  -6 -20   48.74    1.74
  -1  -6 -20    1.88    0.89
   0  -6 -20   96.58    2.04
   1  -6 -20    4.54    0.90
   2  -6 -20    9.11    1.21
  -2  -5 -20   14.63    1.40
  -1  -5 -20   51.87    1.63
   0  -5 -20    1.38    0.53
   1  -5 -20  141.56    2.12
   2  -5 -20   36.75    1.69
  -2  -4 -20   77.30    1.90
  -1  -4 -20   73.73    1.75
   0  -4 -20   82.35    1.19
   1  -4 -20   71.04    1.69
   2  -4 -20   33.55    1.63
   3  -4 -20   57.92    2.22
  -3  -3 -20    1.83    0.96
  -2  -3 -20    4.02    0.94
  -1  -3 -20  216.74    2.52
   0  -3 -20    8.08    0.72
   1  -3 -20  276.69    2.74
   2  -3 -20    0.39    0.92
   3  -3 -20    0.17    1.14
  -3  -2 -20   25.30    1.49
  -2  -2 -20   49.62    1.60
  -1  -2 -20   97.56    1.20
   0  -2 -20    1.04    0.51
   1  -2 -20   86.39    1.81
   2  -2 -20   49.12    1.73
   3  -2 -20  106.52    2.48
  -3  -1 -20    7.93    1.06
  -2  -1 -20    0.99    0.80
  -1  -1 -20  206.35    1.62
   0  -1 -20   14.42    0.82
   1  -1 -20  243.88    2.66
   2  -1 -20    3.96    1.00
   3  -1 -20    3.64    1.18
  -3   0 -20   22.00    1.42
  -2   0 -20   37.97    1.41
  -1   0 -20   33.27    0.88
   0   0 -20   38.75    0.97
   1   0 -20    7.04    0.95
   2   0 -20   42.01    1.72
   3   0 -20  140.23    2.68
  -3   1 -20    6.97    1.02
  -2   1 -20    3.36    0.57
  -1   1 -20  204.48    1.76
   0   1 -20   13.19    1.27
   1   1 -20  235.13    2.70
   2   1 -20    4.59    1.06
   3   1 -20    4.39    1.22
  -2   2 -20   50.72    1.13
  -1   2 -20  100.57    1.27
   0   2 -20    0.38    0.84
   1   2 -20   80.60    1.90
   2   2 -20   46.14    1.79
   3   2 -20  104.66    2.42
  -2   3 -20    6.69    1.06
  -1   3 -20  217.28    1.69
   0   3 -20    7.75    0.96
   1   3 -20  265.05    2.89
   2   3 -20    0.34    0.98
   3   3 -20    2.33    1.12
  -3   4 -20   32.79    1.91
  -2   4 -20   83.03    2.11
  -1   4 -20   70.52    1.28
   0   4 -20   86.35    2.01
   1   4 -20   74.50    1.98
   2   4 -20   33.32    1.72
   3   4 -20   58.02    2.05
  -2   5 -20   18.55    1.72
  -1   5 -20   53.67    1.86
   0   5 -20    2.82    1.00
   1   5 -20  139.02    2.38
   2   5 -20   34.72    1.79
   3   5 -20    7.40    1.22
  -2   6 -20   50.85    2.09
  -1   6 -20    4.08    1.00
   0   6 -20   97.66    2.25
   1   6 -20    6.17    1.12
   2   6 -20   10.60    1.27
  -2   7 -20   19.34    1.87
  -1   7 -20    4.90    1.13
   0   7 -20    4.96    1.18
   1   7 -20   18.04    1.76
   2   7 -20   45.92    1.97
  -1   8 -20    5.90    1.23
   0   8 -20   94.48    2.44
   1   8 -20    2.29    1.13
   2   8 -20   17.24    1.77
  -1   9 -20    5.49    1.19
   0   9 -20    7.02    1.27
   1   9 -20    5.14    1.20
   1  10 -20   20.85    1.92
  -1 -10 -19    2.84    1.03
  -1  -9 -19    2.72    0.98
   0  -9 -19   30.00    1.62
  -2  -8 -19   17.44    1.45
  -1  -8 -19    4.23    0.99
   0  -8 -19   11.85    1.36
  -2  -7 -19    4.54    0.97
  -1  -7 -19   -0.05    0.83
   0  -7 -19   63.96    1.76
   1  -7 -19   49.86    1.55
   2  -7 -19    0.14    0.95
  -2  -6 -19   89.29    2.00
  -1  -6 -19   31.39    1.45
   0  -6 -19    6.45    0.95
   1  -6 -19   -0.16    0.77
   2  -6 -19   35.45    1.67
  -2  -5 -19   23.20    1.38
  -1  -5 -19    2.74    0.82
   0  -5 -19  174.29    1.51
   1  -5 -19   98.46    1.79
   2  -5 -19    9.33    1.09
   3  -5 -19    2.12    1.19
  -3  -4 -19    9.90    1.21
  -2  -4 -19   91.09    1.89
  -1  -4 -19   96.34    1.84
   0  -4 -19    9.71    0.75
   1  -4 -19    2.32    0.79
   2  -4 -19   52.42    1.73
   3  -4 -19   71.17    2.21
  -3  -3 -19    6.95    1.08
  -2  -3 -19   48.44    1.52
  -1  -3 -19   40.81    1.38
   0  -3 -19  113.39    1.27
   1  -3 -19   45.07    1.45
   2  -3 -19    9.22    1.07
   3  -3 -19    3.15    1.17
  -3  -2 -19    4.66    1.00
  -2  -2 -19   35.32    1.40
  -1  -2 -19   18.93    0.79
   0  -2 -19   12.63    0.77
   1  -2 -19   22.86    1.28
   2  -2 -19   41.30    1.60
   3  -2 -19   18.56    1.68
  -3  -1 -19    1.69    0.89
  -2  -1 -19   10.55    1.14
  -1  -1 -19   36.31    0.90
   0  -1 -19    8.71    0.73
   1  -1 -19    5.51    0.87
   2  -1 -19    1.21    0.87
   3  -1 -19    0.55    1.07
  -3   0 -19    1.13    0.83
  -2   0 -19    0.57    0.73
  -1   0 -19    0.56    0.46
   0   0 -19   -0.72    0.46
   1   0 -19   -0.11    0.73
   2   0 -19    1.15    0.87
   3   0 -19    0.98    1.06
  -3   1 -19    1.85    0.84
  -2   1 -19   13.53    0.89
  -1   1 -19   35.11    0.88
   0   1 -19    9.55    0.93
   1   1 -19    5.60    0.89
   2   1 -19    0.36    0.89
   3   1 -19    2.61    1.13
  -2   2 -19   36.02    1.07
  -1   2 -19   17.61    0.80
   0   2 -19   11.23    1.22
   1   2 -19   19.71    1.34
   2   2 -19   41.70    1.68
   3   2 -19   21.56    1.70
  -2   3 -19   53.26    1.77
  -1   3 -19   40.83    0.94
   0   3 -19  112.85    1.99
   1   3 -19   44.17    1.58
   2   3 -19   10.02    1.16
   3   3 -19    4.22    1.13
  -3   4 -19   14.97    1.68
  -2   4 -19   96.24    2.13
  -1   4 -19   95.19    1.19
   0   4 -19    9.60    1.05
   1   4 -19    2.19    0.92
   2   4 -19   51.09    1.80
   3   4 -19   70.23    2.08
  -3   5 -19   14.90    1.70
  -2   5 -19   25.72    1.70
  -1   5 -19    3.45    0.99
   0   5 -19  179.76    2.52
   1   5 -19  103.78    2.14
   2   5 -19    8.79    1.14
   3   5 -19    2.89    1.07
  -2   6 -19   86.95    2.17
  -1   6 -19   34.52    1.68
   0   6 -19    8.16    1.13
   1   6 -19    2.32    1.03
   2   6 -19   38.14    1.79
  -2   7 -19    6.36    1.24
  -1   7 -19    2.10    1.03
   0   7 -19   65.30    2.01
   1   7 -19   59.09    2.02
   2   7 -19    1.70    1.05
  -2   8 -19   18.93    1.82
  -1   8 -19    3.95    1.14
   0   8 -19   18.08    1.72
   1   8 -19    6.59    1.17
   2   8 -19   25.48    1.77
  -1   9 -19    5.95    1.19
   0   9 -19   36.80    1.94
   1   9 -19    3.23    1.11
   0  10 -19   13.98    1.74
   1  10 -19   27.57    1.81
  -1 -10 -18   43.12    1.73
  -2  -9 -18   33.48    1.62
  -1  -9 -18    3.38    0.97
   0  -9 -18   33.00    1.58
  -2  -8 -18   43.14    1.68
  -1  -8 -18   14.83    1.35
   0  -8 -18   63.50    1.78
   1  -8 -18    0.09    0.77
  -2  -7 -18   16.15    1.36
  -1  -7 -18   31.15    1.44
   0  -7 -18   10.69    1.25
   1  -7 -18   77.14    1.67
   2  -7 -18    5.29    1.02
  -2  -6 -18   34.22    1.46
  -1  -6 -18   17.23    1.25
   0  -6 -18   49.38    1.54
   1  -6 -18   58.44    1.49
   2  -6 -18   18.79    1.44
   3  -6 -18   57.34    2.16
  -3  -5 -18   15.46    1.53
  -2  -5 -18    4.74    0.90
  -1  -5 -18  145.77    2.12
   0  -5 -18    4.45    0.52
   1  -5 -18  108.08    1.78
   2  -5 -18   11.75    1.11
   3  -5 -18    0.04    1.10
  -3  -4 -18   71.05    1.99
  -2  -4 -18   13.40    1.18
  -1  -4 -18    3.11    0.77
   0  -4 -18   96.55    1.15
   1  -4 -18   88.58    1.66
   2  -4 -18  130.69    2.17
   3  -4 -18   24.81    1.73
  -3  -3 -18   36.24    1.60
  -2  -3 -18    6.97    0.88
  -1  -3 -18  216.47    1.53
   0  -3 -18   87.80    1.11
   1  -3 -18   70.06    1.54
   2  -3 -18  108.33    2.02
   3  -3 -18    1.46    1.09
  -3  -2 -18  112.04    2.14
  -2  -2 -18    1.04    0.71
  -1  -2 -18    2.53    0.45
   0  -2 -18  109.43    1.20
   1  -2 -18   50.53    1.44
   2  -2 -18  289.09    2.91
   3  -2 -18    2.11    1.07
  -3  -1 -18   23.49    1.39
  -2  -1 -18   12.52    1.09
  -1  -1 -18  363.00    1.92
   0  -1 -18   28.52    0.81
   1  -1 -18    2.46    0.74
   2  -1 -18   57.21    1.67
   3  -1 -18    2.23    1.06
  -3   0 -18   95.66    1.94
  -2   0 -18    8.18    0.96
  -1   0 -18    2.26    0.46
   0   0 -18   57.71    0.96
   1   0 -18   69.87    1.59
   2   0 -18  364.62    3.24
   3   0 -18    1.54    1.05
  -3   1 -18   22.70    1.29
  -2   1 -18   13.22    0.78
  -1   1 -18  369.33    1.97
   0   1 -18   29.49    0.84
   1   1 -18    1.68    0.76
   2   1 -18   54.46    1.71
   3   1 -18    1.97    1.01
  -2   2 -18    1.29    0.50
  -1   2 -18    2.01    0.47
   0   2 -18  101.57    1.73
   1   2 -18   47.27    1.49
   2   2 -18  278.54    2.94
   3   2 -18    3.59    1.05
  -3   3 -18   40.41    1.80
  -2   3 -18    9.46    0.78
  -1   3 -18  214.30    1.55
   0   3 -18   89.75    1.80
   1   3 -18   66.48    1.69
   2   3 -18  103.62    2.08
   3   3 -18    1.40    1.04
  -3   4 -18   70.38    2.10
  -2   4 -18   17.31    1.47
  -1   4 -18    4.16    0.52
   0   4 -18   97.29    1.92
   1   4 -18   82.99    1.82
   2   4 -18  127.70    2.25
   3   4 -18   25.40    1.64
  -3   5 -18   16.84    1.76
  -2   5 -18    4.94    1.06
  -1   5 -18  144.68    2.24
   0   5 -18    5.37    0.99
   1   5 -18  111.08    2.12
   2   5 -18   10.98    1.13
   3   5 -18    0.76    0.99
  -3   6 -18   11.18    1.36
  -2   6 -18   35.87    1.81
  -1   6 -18   19.67    1.55
   0   6 -18   48.12    1.72
   1   6 -18   64.69    1.90
   2   6 -18   19.20    1.55
  -2   7 -18   18.48    1.76
  -1   7 -18   30.50    1.71
   0   7 -18   12.68    1.52
   1   7 -18   81.27    2.01
   2   7 -18    6.70    1.16
  -2   8 -18   45.37    2.02
  -1   8 -18   18.04    1.69
   0   8 -18   62.17    1.94
   1   8 -18    2.18    0.95
   2   8 -18    1.80    1.03
  -1   9 -18    5.06    1.16
   0   9 -18   37.02    1.75
   1   9 -18   62.60    1.94
  -1  10 -18   44.94    2.02
   0  10 -18   72.10    2.08
   1  10 -18   21.78    1.66
   0  11 -18   76.75    2.11
  -1 -10 -17   19.23    1.45
  -2  -9 -17   29.66    1.54
  -1  -9 -17   10.33    1.13
   0  -9 -17    0.83    0.86
  -2  -8 -17    0.57    0.82
  -1  -8 -17    2.11    0.83
   0  -8 -17   32.28    1.45
   1  -8 -17   75.31    1.62
  -2  -7 -17   46.03    1.61
  -1  -7 -17  110.54    1.97
   0  -7 -17    0.34    0.75
   1  -7 -17    1.86    0.72
   2  -7 -17   11.27    1.35
  -3  -6 -17   24.62    1.61
  -2  -6 -17    0.59    0.79
  -1  -6 -17    9.57    0.96
   0  -6 -17   12.77    0.73
   1  -6 -17  243.26    2.36
   2  -6 -17   24.35    1.43
   3  -6 -17    7.02    1.24
  -3  -5 -17    1.35    0.95
  -2  -5 -17   80.51    1.79
  -1  -5 -17  127.15    1.95
   0  -5 -17   28.79    0.79
   1  -5 -17    6.57    0.80
   2  -5 -17   23.24    1.37
   3  -5 -17   47.03    1.93
  -3  -4 -17   34.73    1.62
  -2  -4 -17    1.16    0.76
  -1  -4 -17    0.82    0.68
   0  -4 -17   16.00    0.70
   1  -4 -17  284.12    2.48
   2  -4 -17   10.21    1.25
   3  -4 -17    2.38    1.09
  -3  -3 -17    2.72    0.91
  -2  -3 -17   77.03    1.65
  -1  -3 -17   22.80    0.72
   0  -3 -17   18.06    0.71
   1  -3 -17    8.16    1.00
   2  -3 -17  107.35    1.95
   3  -3 -17   31.55    1.73
  -3  -2 -17    4.19    0.91
  -2  -2 -17    3.43    0.75
  -1  -2 -17    3.32    0.43
   0  -2 -17   88.46    1.07
   1  -2 -17  105.07    1.71
   2  -2 -17   -0.22    0.76
   3  -2 -17    2.73    1.01
  -3  -1 -17    6.85    0.96
  -2  -1 -17   15.34    1.07
  -1  -1 -17    1.39    0.42
   0  -1 -17    2.83    0.46
   1  -1 -17   11.26    1.04
   2  -1 -17   83.05    1.77
   3  -1 -17    7.34    1.11
  -4   0 -17    2.21    0.98
  -3   0 -17    1.75    0.80
  -2   0 -17    1.41    0.45
  -1   0 -17    0.06    0.41
   0   0 -17   11.24    0.88
   1   0 -17    0.58    0.64
   2   0 -17    0.56    0.78
   3   0 -17    0.15    0.94
  -3   1 -17    5.78    0.88
  -2   1 -17   16.68    0.78
  -1   1 -17    1.65    0.45
   0   1 -17    2.47    0.46
   1   1 -17   11.21    1.11
   2   1 -17   83.24    1.82
   3   1 -17    7.20    1.08
   4   1 -17    3.03    1.29
  -2   2 -17    4.00    0.53
  -1   2 -17    2.94    0.47
   0   2 -17   87.80    1.64
   1   2 -17   97.61    1.73
   2   2 -17    0.89    0.80
   3   2 -17    3.11    0.99
   4   2 -17    0.54    1.13
  -3   3 -17    3.77    1.01
  -2   3 -17   76.61    1.09
  -1   3 -17   21.63    0.75
   0   3 -17   16.69    1.22
   1   3 -17    7.98    0.92
   2   3 -17  106.89    2.02
   3   3 -17   33.76    1.66
  -3   4 -17   33.68    1.73
  -2   4 -17    2.58    0.91
  -1   4 -17    1.32    0.43
   0   4 -17   15.53    1.32
   1   4 -17  285.98    2.82
   2   4 -17   10.77    1.07
   3   4 -17    1.47    0.94
  -3   5 -17    1.61    1.11
  -2   5 -17   76.43    1.92
  -1   5 -17  123.70    2.06
   0   5 -17   30.34    1.47
   1   5 -17    6.12    0.96
   2   5 -17   23.39    1.46
   3   5 -17   45.16    1.74
  -3   6 -17   24.34    1.86
  -2   6 -17    1.57    1.00
  -1   6 -17    9.56    1.10
   0   6 -17   14.18    1.39
   1   6 -17  255.40    2.84
   2   6 -17   25.92    1.53
  -2   7 -17   44.09    1.95
  -1   7 -17  110.31    2.16
   0   7 -17    1.75    0.85
   1   7 -17    3.14    0.90
   2   7 -17   12.94    1.47
  -2   8 -17    1.69    1.15
  -1   8 -17    3.18    1.04
   0   8 -17   30.74    1.59
   1   8 -17   82.33    2.00
   2   8 -17    3.79    1.05
  -2   9 -17   29.20    1.94
  -1   9 -17   14.89    1.67
   0   9 -17    2.21    0.96
   1   9 -17   12.48    1.53
  -1  10 -17   23.80    1.84
   0  10 -17   13.35    1.51
   1  10 -17   20.93    1.62
   0  11 -17   22.63    1.67
  -2 -10 -16   24.77    1.45
  -1 -10 -16   71.03    1.87
  -2  -9 -16    1.60    0.85
  -1  -9 -16  117.02    2.09
   0  -9 -16    8.13    1.00
  -2  -8 -16   41.38    1.60
  -1  -8 -16   68.52    1.69
   0  -8 -16    0.46    0.76
   1  -8 -16   29.43    1.23
  -3  -7 -16    3.06    1.05
  -2  -7 -16    0.85    0.78
  -1  -7 -16  197.36    2.40
   0  -7 -16    1.56    0.77
   1  -7 -16  188.09    2.12
   2  -7 -16   10.35    1.27
  -3  -6 -16   74.67    2.03
  -2  -6 -16   42.09    1.46
  -1  -6 -16    1.55    0.71
   0  -6 -16   35.41    0.80
   1  -6 -16   34.42    1.19
   2  -6 -16   45.37    1.55
  -3  -5 -16   26.29    1.58
  -2  -5 -16   11.73    1.13
  -1  -5 -16   89.65    1.65
   0  -5 -16   11.38    0.64
   1  -5 -16   83.25    1.50
   2  -5 -16  102.16    1.91
   3  -5 -16    9.13    1.23
  -3  -4 -16   44.75    1.69
  -2  -4 -16   33.07    1.31
  -1  -4 -16    9.46    0.91
   0  -4 -16  154.04    1.25
   1  -4 -16    0.23    0.60
   2  -4 -16   52.50    1.55
   3  -4 -16   18.26    1.55
  -3  -3 -16   50.69    1.68
  -2  -3 -16  111.21    1.79
  -1  -3 -16   31.80    0.72
   0  -3 -16    0.60    0.40
   1  -3 -16   10.19    0.94
   2  -3 -16   98.63    1.82
   3  -3 -16   58.32    1.88
  -3  -2 -16   11.68    1.29
  -2  -2 -16   16.89    1.07
  -1  -2 -16    2.62    0.41
   0  -2 -16  772.24    2.59
   1  -2 -16    1.04    0.61
   2  -2 -16   69.46    1.62
   3  -2 -16   21.80    1.50
  -4  -1 -16   21.21    1.55
  -3  -1 -16  141.02    2.12
  -2  -1 -16  212.27    2.22
  -1  -1 -16   11.65    0.61
   0  -1 -16    6.91    0.54
   1  -1 -16    0.80    0.62
   2  -1 -16  288.78    2.73
   3  -1 -16  163.17    2.49
   4  -1 -16   29.86    1.89
  -4   0 -16   24.08    1.53
  -3   0 -16    7.39    0.90
  -2   0 -16    8.16    0.61
  -1   0 -16    5.28    0.48
   0   0 -16 1797.15    3.90
   1   0 -16    8.45    0.94
   2   0 -16   70.94    1.61
   3   0 -16    4.15    0.98
   4   0 -16   23.69    1.79
  -3   1 -16  137.85    1.98
  -2   1 -16  203.60    1.93
  -1   1 -16    9.77    0.65
   0   1 -16    6.80    0.56
   1   1 -16    0.80    0.68
   2   1 -16  283.42    2.72
   3   1 -16  161.84    2.43
   4   1 -16   29.74    1.86
  -3   2 -16   11.00    1.05
  -2   2 -16   18.58    0.77
  -1   2 -16    2.34    0.43
   0   2 -16  776.21    3.90
   1   2 -16    0.95    0.67
   2   2 -16   71.52    1.67
   3   2 -16   21.35    1.47
   4   2 -16   18.96    1.70
  -3   3 -16   49.41    1.74
  -2   3 -16  112.12    1.20
  -1   3 -16   31.58    0.76
   0   3 -16   -0.37    0.68
   1   3 -16   10.23    0.89
   2   3 -16   94.30    1.87
   3   3 -16   60.77    1.80
  -3   4 -16   41.15    1.75
  -2   4 -16   32.06    1.52
  -1   4 -16    8.55    0.57
   0   4 -16  147.16    1.98
   1   4 -16    0.23    0.74
   2   4 -16   49.87    1.59
   3   4 -16   21.19    1.46
  -3   5 -16   26.17    1.72
  -2   5 -16   12.85    1.42
  -1   5 -16   89.10    1.82
   0   5 -16   11.25    1.16
   1   5 -16   82.24    1.80
   2   5 -16   97.31    1.95
   3   5 -16    7.97    1.05
  -3   6 -16   66.69    2.13
  -2   6 -16   39.82    1.73
  -1   6 -16    2.77    0.88
   0   6 -16   36.38    1.48
   1   6 -16   33.02    1.43
   2   6 -16   46.22    1.65
  -3   7 -16    0.40    1.17
  -2   7 -16    1.51    1.04
  -1   7 -16  187.10    2.51
   0   7 -16    1.99    0.83
   1   7 -16  185.93    2.42
   2   7 -16   13.53    1.41
  -2   8 -16   40.00    1.93
  -1   8 -16   63.87    1.95
   0   8 -16    2.63    0.85
   1   8 -16   35.55    1.58
   2   8 -16   42.29    1.69
  -2   9 -16    1.64    1.15
  -1   9 -16  112.09    2.36
   0   9 -16    8.36    1.07
   1   9 -16  164.51    2.48
  -1  10 -16   67.19    2.15
   0  10 -16    3.16    0.95
   1  10 -16   33.35    1.72
  -1  11 -16   43.54    1.98
   0  11 -16    4.71    1.00
   0  12 -16    4.96    1.05
   0 -12 -15    2.58    0.84
  -2 -11 -15    1.66    0.91
   0 -11 -15    1.49    0.77
   2 -11 -15    3.01    1.23
  -2 -10 -15    1.01    0.84
  -1 -10 -15   40.44    1.53
   0 -10 -15    1.89    0.70
   2 -10 -15    1.14    1.08
  -2  -9 -15    2.47    0.88
  -1  -9 -15    6.07    0.92
   0  -9 -15    0.68    0.77
   2  -9 -15   35.49    1.58
  -2  -8 -15   10.51    1.25
  -1  -8 -15  158.88    2.19
   0  -8 -15   19.73    1.24
   1  -8 -15   16.07    1.13
   2  -8 -15    9.92    1.13
   3  -8 -15   14.08    1.39
  -3  -7 -15   73.78    2.01
  -2  -7 -15    2.67    0.81
  -1  -7 -15   29.47    1.22
   0  -7 -15   31.77    1.27
   1  -7 -15  111.30    1.21
   2  -7 -15  126.26    1.42
   3  -7 -15    7.14    1.14
  -3  -6 -15   14.90    1.41
  -2  -6 -15   14.23    1.16
  -1  -6 -15  218.13    2.32
   0  -6 -15   38.12    0.77
   1  -6 -15   16.14    0.68
   2  -6 -15   40.39    0.95
   3  -6 -15   25.76    1.37
  -3  -5 -15   39.02    1.64
  -2  -5 -15   16.21    1.11
  -1  -5 -15   51.56    1.28
   0  -5 -15   32.81    0.72
   1  -5 -15   48.84    0.82
   2  -5 -15   71.70    1.06
   3  -5 -15    0.86    0.67
  -3  -4 -15   14.85    1.35
  -2  -4 -15    9.00    0.88
  -1  -4 -15  138.85    1.80
   0  -4 -15    0.47    0.37
   1  -4 -15    1.22    0.60
   2  -4 -15   15.92    0.71
   3  -4 -15   16.54    0.92
   4  -4 -15   20.48    1.53
  -3  -3 -15    5.00    0.94
  -2  -3 -15    3.65    0.71
  -1  -3 -15   22.45    0.98
   0  -3 -15   25.69    0.70
   1  -3 -15   41.59    1.14
   2  -3 -15   15.28    0.68
   3  -3 -15    0.45    0.59
   4  -3 -15    8.49    1.24
  -4  -2 -15    2.64    1.00
  -3  -2 -15    6.34    0.92
  -2  -2 -15   27.95    1.11
  -1  -2 -15   52.45    0.81
   0  -2 -15    1.16    0.37
   1  -2 -15   27.24    1.07
   2  -2 -15    3.14    0.45
   3  -2 -15   52.74    1.07
   4  -2 -15    7.63    0.87
  -4  -1 -15   13.78    1.43
  -3  -1 -15    1.95    0.78
  -2  -1 -15    3.62    0.45
  -1  -1 -15    0.98    0.38
   0  -1 -15   28.54    0.70
   1  -1 -15   23.63    1.04
   2  -1 -15    5.03    0.49
   3  -1 -15    1.72    0.57
   4  -1 -15    4.60    0.78
  -4   0 -15    2.54    0.95
  -3   0 -15    0.61    0.71
  -2   0 -15    1.68    0.43
  -1   0 -15    0.53    0.38
   0   0 -15    1.70    0.39
   1   0 -15   -0.34    0.56
   2   0 -15    0.77    0.39
   3   0 -15    2.26    0.56
   4   0 -15    2.24    0.73
  -3   1 -15    2.09    0.71
  -2   1 -15    2.72    0.46
  -1   1 -15    0.12    0.39
   0   1 -15   26.83    0.69
   1   1 -15   24.76    1.12
   2   1 -15    5.44    0.79
   3   1 -15    1.78    0.57
   4   1 -15    5.07    0.82
  -3   2 -15    6.59    0.62
  -2   2 -15   28.20    0.79
  -1   2 -15   50.36    0.83
   0   2 -15    0.28    0.63
   1   2 -15   25.31    1.15
   2   2 -15    2.24    0.74
   3   2 -15   54.35    1.07
   4   2 -15    6.28    1.23
  -3   3 -15    3.60    0.93
  -2   3 -15    4.22    0.50
  -1   3 -15   21.52    0.68
   0   3 -15   23.34    1.20
   1   3 -15   36.99    1.24
   2   3 -15   16.76    1.22
   3   3 -15    0.50    0.83
  -3   4 -15   13.30    1.47
  -2   4 -15    8.63    0.97
  -1   4 -15  139.17    1.16
   0   4 -15    0.13    0.68
   1   4 -15    0.98    0.75
   2   4 -15   18.49    1.25
   3   4 -15   17.98    1.35
  -3   5 -15   35.28    1.76
  -2   5 -15   16.46    1.41
  -1   5 -15   49.92    1.53
   0   5 -15   33.20    1.29
   1   5 -15   44.66    1.42
   2   5 -15   73.51    1.72
   3   5 -15    1.53    0.84
  -3   6 -15   10.73    1.28
  -2   6 -15   11.65    1.43
  -1   6 -15  207.79    2.44
   0   6 -15   36.26    1.36
   1   6 -15   15.41    1.22
   2   6 -15   41.92    1.55
  -3   7 -15   64.67    2.17
  -2   7 -15    0.00    0.97
  -1   7 -15   30.01    1.55
   0   7 -15   33.02    1.46
   1   7 -15  111.04    1.98
   2   7 -15  125.96    2.11
  -2   8 -15    7.74    1.21
  -1   8 -15  151.57    2.41
   0   8 -15   22.82    1.42
   1   8 -15   20.60    1.44
   2   8 -15   12.25    1.35
  -2   9 -15    1.45    1.14
  -1   9 -15    6.86    1.14
   0   9 -15    3.29    0.94
   1   9 -15   71.17    1.87
  -2  10 -15    1.17    1.21
  -1  10 -15   39.03    1.92
   0  10 -15    4.94    1.00
   1  10 -15   14.39    1.49
  -1  11 -15    3.49    1.16
   0  11 -15    6.76    1.09
   0  12 -15    7.24    1.08
   0 -12 -14    4.57    0.88
  -2 -11 -14    1.79    0.87
  -1 -11 -14   63.21    1.75
   0 -11 -14   25.71    1.34
   2 -11 -14    3.58    1.25
  -2 -10 -14    6.19    0.99
  -1 -10 -14    0.73    0.51
   0 -10 -14   36.69    1.34
   2 -10 -14   71.09    1.91
  -2  -9 -14    0.80    0.81
  -1  -9 -14  129.52    2.01
   0  -9 -14   96.61    1.22
   2  -9 -14   30.15    1.50
   3  -9 -14    0.06    1.17
  -3  -8 -14   69.06    1.94
  -2  -8 -14    0.44    0.73
  -1  -8 -14    1.44    0.68
   0  -8 -14  208.41    2.32
   1  -8 -14  135.17    1.93
   2  -8 -14  159.01    2.21
   3  -8 -14   -0.18    0.98
  -3  -7 -14   49.01    1.74
  -2  -7 -14   29.63    1.33
  -1  -7 -14  169.32    2.09
   0  -7 -14   50.92    1.36
   1  -7 -14   50.18    0.89
   2  -7 -14   72.96    1.15
   3  -7 -14    0.76    1.02
  -3  -6 -14   43.61    1.60
  -2  -6 -14   52.99    1.47
  -1  -6 -14    4.51    0.68
   0  -6 -14  148.62    1.23
   1  -6 -14   13.62    0.66
   2  -6 -14  114.19    1.27
   3  -6 -14   24.87    1.37
  -3  -5 -14    3.49    0.93
  -2  -5 -14   81.80    1.61
  -1  -5 -14   66.20    1.34
   0  -5 -14    7.41    0.52
   1  -5 -14   80.28    0.91
   2  -5 -14   46.65    0.91
   3  -5 -14    7.25    0.75
   4  -5 -14   22.84    1.78
  -3  -4 -14    7.89    1.01
  -2  -4 -14   90.84    1.59
  -1  -4 -14    6.63    0.79
   0  -4 -14   91.76    0.94
   1  -4 -14    0.08    0.35
   2  -4 -14    4.87    0.52
   3  -4 -14   38.19    1.02
   4  -4 -14    2.18    1.12
  -4  -3 -14   38.01    1.72
  -3  -3 -14    0.70    0.74
  -2  -3 -14   55.08    1.30
  -1  -3 -14   11.33    0.81
   0  -3 -14   45.79    0.75
   1  -3 -14  165.83    1.07
   2  -3 -14   25.12    0.71
   3  -3 -14   63.82    1.15
   4  -3 -14    6.33    1.20
  -4  -2 -14    3.22    0.97
  -3  -2 -14    1.62    0.76
  -2  -2 -14  257.56    2.28
  -1  -2 -14  112.02    1.05
   0  -2 -14  273.53    1.88
   1  -2 -14    2.49    0.59
   2  -2 -14   12.48    0.61
   3  -2 -14  191.64    1.68
   4  -2 -14    1.23    0.75
  -4  -1 -14  103.17    2.13
  -3  -1 -14    3.40    0.76
  -2  -1 -14  116.60    1.06
  -1  -1 -14    7.74    0.54
   0  -1 -14  269.39    1.45
   1  -1 -14  987.29    4.04
   2  -1 -14   57.53    0.82
   3  -1 -14  190.12    1.64
   4  -1 -14    2.13    0.74
  -4   0 -14    5.11    0.99
  -3   0 -14    3.35    0.75
  -2   0 -14  614.46    3.42
  -1   0 -14  185.24    1.56
   0   0 -14  391.92    1.75
   1   0 -14   58.35    1.24
   2   0 -14   12.96    0.58
   3   0 -14  544.49    2.89
   4   0 -14    2.65    0.79
  -3   1 -14    2.47    0.71
  -2   1 -14  115.44    1.10
  -1   1 -14    6.90    0.50
   0   1 -14  272.16    1.72
   1   1 -14  995.11    4.18
   2   1 -14   56.38    0.81
   3   1 -14  190.17    1.62
   4   1 -14    1.01    0.75
  -3   2 -14    2.45    0.52
  -2   2 -14  259.40    1.63
  -1   2 -14  109.59    1.10
   0   2 -14  277.20    2.30
   1   2 -14    2.31    0.65
   2   2 -14   12.78    0.57
   3   2 -14  192.22    2.28
   4   2 -14    3.66    1.11
  -3   3 -14   -0.32    0.85
  -2   3 -14   58.52    0.89
  -1   3 -14   10.98    0.58
   0   3 -14   42.68    1.22
   1   3 -14  154.44    1.89
   2   3 -14   25.33    0.69
   3   3 -14   65.77    1.09
   4   3 -14    9.67    1.25
  -3   4 -14    4.78    1.04
  -2   4 -14   88.49    1.74
  -1   4 -14    7.06    0.51
   0   4 -14   88.78    1.57
   1   4 -14   -1.43    0.65
   2   4 -14    5.23    0.51
   3   4 -14   41.20    0.99
   4   4 -14    4.52    1.16
  -3   5 -14    1.50    1.02
  -2   5 -14   81.71    1.80
  -1   5 -14   66.41    1.57
   0   5 -14    7.54    0.85
   1   5 -14   75.00    1.55
   2   5 -14   46.94    0.91
   3   5 -14    9.28    0.73
   4   5 -14   32.11    1.68
  -3   6 -14   35.98    1.78
  -2   6 -14   49.70    1.66
  -1   6 -14    4.44    0.87
   0   6 -14  143.09    1.98
   1   6 -14   12.40    1.20
   2   6 -14  115.26    1.30
   3   6 -14   26.11    1.38
  -3   7 -14   39.19    1.91
  -2   7 -14   29.22    1.61
  -1   7 -14  161.74    2.28
   0   7 -14   49.17    1.51
   1   7 -14   49.85    1.54
   2   7 -14   74.70    1.71
  -3   8 -14   59.93    2.17
  -2   8 -14   -0.31    1.02
  -1   8 -14    1.65    0.93
   0   8 -14  192.66    2.38
   1   8 -14  144.94    2.20
  -2   9 -14    0.23    1.14
  -1   9 -14  122.62    2.26
   0   9 -14   92.41    1.91
   1   9 -14   14.22    1.36
  -2  10 -14    3.66    1.24
  -1  10 -14    2.59    1.09
   0  10 -14   37.74    1.59
   1  10 -14   68.73    1.82
  -1  11 -14   66.57    2.20
   0  11 -14   29.11    1.59
  -1  12 -14    3.14    1.19
   0  12 -14   14.35    1.51
  -1 -12 -13    8.17    1.01
   0 -12 -13    7.43    0.95
  -2 -11 -13    1.51    0.87
  -1 -11 -13    9.78    0.99
   0 -11 -13    8.99    0.93
   2 -11 -13    4.95    1.25
  -2 -10 -13    1.06    0.81
  -1 -10 -13    7.25    0.61
   0 -10 -13   12.61    1.10
   2 -10 -13    8.60    1.33
  -2  -9 -13    7.88    0.94
  -1  -9 -13    0.38    0.44
   0  -9 -13   82.37    1.12
   1  -9 -13    9.07    0.70
   2  -9 -13   34.61    1.52
   3  -9 -13    2.31    1.18
  -3  -8 -13   37.81    1.62
  -2  -8 -13   20.03    1.24
  -1  -8 -13   59.28    1.42
   0  -8 -13   51.46    0.93
   1  -8 -13   26.82    0.77
   2  -8 -13   47.37    1.48
   3  -8 -13   15.65    1.41
  -3  -7 -13   51.40    1.68
  -2  -7 -13   34.80    1.31
  -1  -7 -13   52.99    1.29
   0  -7 -13  211.87    1.47
   1  -7 -13    7.67    0.57
   2  -7 -13   97.78    1.70
   3  -7 -13   11.60    1.31
  -3  -6 -13   54.49    1.65
  -2  -6 -13   49.01    1.38
  -1  -6 -13   52.42    1.24
   0  -6 -13   61.72    0.80
   1  -6 -13  128.20    1.13
   2  -6 -13   97.21    1.18
   3  -6 -13    3.48    1.00
  -3  -5 -13   16.56    1.31
  -2  -5 -13   31.75    1.17
  -1  -5 -13  109.23    1.57
   0  -5 -13   85.93    0.88
   1  -5 -13    9.74    0.55
   2  -5 -13   98.52    1.13
   3  -5 -13   20.45    0.95
   4  -5 -13   17.09    1.56
  -3  -4 -13   44.55    1.51
  -2  -4 -13   20.04    1.01
  -1  -4 -13    6.24    0.65
   0  -4 -13  125.18    1.00
   1  -4 -13   34.22    0.65
   2  -4 -13   75.33    0.97
   3  -4 -13   13.34    0.84
   4  -4 -13    5.40    1.19
  -4  -3 -13    5.99    1.10
  -3  -3 -13    6.17    0.90
  -2  -3 -13   17.36    0.95
  -1  -3 -13  107.92    1.44
   0  -3 -13    9.34    0.51
   1  -3 -13   10.16    0.47
   2  -3 -13  128.91    1.14
   3  -3 -13    8.39    0.70
   4  -3 -13    7.17    1.21
  -4  -2 -13    3.37    1.01
  -3  -2 -13   13.93    1.15
  -2  -2 -13   46.33    1.15
  -1  -2 -13   12.48    0.51
   0  -2 -13   57.81    0.75
   1  -2 -13   43.34    0.61
   2  -2 -13   36.30    0.72
   3  -2 -13    1.09    0.55
   4  -2 -13    3.23    1.02
  -3  -1 -13    0.84    0.69
  -2  -1 -13    7.96    0.81
  -1  -1 -13   37.56    0.66
   0  -1 -13    5.52    0.46
   1  -1 -13   45.63    1.07
   2  -1 -13   50.49    0.79
   3  -1 -13    0.87    0.52
   4  -1 -13   10.11    1.15
  -4   0 -13    2.55    0.91
  -3   0 -13    0.94    0.66
  -2   0 -13    0.54    0.39
  -1   0 -13    0.04    0.32
   0   0 -13   -0.07    0.31
   1   0 -13    0.26    0.48
   2   0 -13    0.36    0.36
   3   0 -13    6.52    0.82
   4   0 -13    2.27    0.71
  -4   1 -13    4.25    0.90
  -3   1 -13    1.36    0.64
  -2   1 -13    7.62    0.60
  -1   1 -13   37.98    0.75
   0   1 -13    6.20    0.45
   1   1 -13   44.48    1.14
   2   1 -13   49.96    0.77
   3   1 -13    2.30    0.54
   4   1 -13    5.77    0.78
  -3   2 -13   13.17    0.77
  -2   2 -13   47.58    0.81
  -1   2 -13   11.69    0.58
   0   2 -13   58.90    0.78
   1   2 -13   41.79    1.14
   2   2 -13   36.92    0.73
   3   2 -13    1.61    0.52
   4   2 -13    2.96    1.08
  -3   3 -13    4.13    0.92
  -2   3 -13   18.10    0.66
  -1   3 -13  106.84    0.97
   0   3 -13    7.82    0.89
   1   3 -13    9.29    0.93
   2   3 -13  130.82    1.14
   3   3 -13   10.27    0.78
   4   3 -13    7.72    1.22
  -3   4 -13   37.07    1.58
  -2   4 -13   19.07    1.24
  -1   4 -13    5.54    0.47
   0   4 -13  112.68    1.57
   1   4 -13   31.96    0.67
   2   4 -13   76.02    0.97
   3   4 -13   14.86    0.81
   4   4 -13    7.41    1.28
  -4   5 -13   -0.01    1.24
  -3   5 -13   12.28    1.47
  -2   5 -13   30.06    1.45
  -1   5 -13  111.38    1.78
   0   5 -13   82.56    1.55
   1   5 -13    9.08    0.56
   2   5 -13  100.16    1.13
   3   5 -13   23.70    1.27
   4   5 -13   24.51    1.71
  -3   6 -13   47.96    1.85
  -2   6 -13   47.01    1.62
  -1   6 -13   51.68    1.51
   0   6 -13   60.84    1.48
   1   6 -13  129.74    1.38
   2   6 -13   99.18    1.19
   3   6 -13    3.69    0.97
  -3   7 -13   44.09    1.95
  -2   7 -13   31.56    1.60
  -1   7 -13   52.03    1.61
   0   7 -13  200.39    2.26
   1   7 -13    8.82    0.64
   2   7 -13  101.81    1.25
   3   7 -13   15.61    1.41
  -3   8 -13   31.35    1.98
  -2   8 -13   17.27    1.64
  -1   8 -13   55.84    1.72
   0   8 -13   49.86    1.56
   1   8 -13   28.12    0.93
   2   8 -13   51.72    1.55
   3   8 -13   21.23    1.58
  -2   9 -13    5.83    1.24
  -1   9 -13    0.93    0.95
   0   9 -13   79.70    1.80
   1   9 -13   13.30    1.28
   2   9 -13   34.64    1.53
   3   9 -13    4.83    1.26
  -2  10 -13   -0.99    1.18
  -1  10 -13    8.42    1.19
   0  10 -13   17.26    1.42
   1  10 -13    5.55    0.93
  -1  11 -13   11.08    1.32
   0  11 -13   13.45    1.47
  -1  12 -13   10.62    1.33
   0  12 -13   16.20    1.49
   0 -13 -12   -0.01    0.82
  -1 -12 -12    0.31    0.80
   0 -12 -12  143.56    2.27
  -2 -11 -12   39.29    1.54
  -1 -11 -12    0.12    0.73
   0 -11 -12   -0.05    0.69
   2 -11 -12   41.01    1.74
  -2 -10 -12   16.50    1.24
  -1 -10 -12   24.18    0.87
   0 -10 -12  241.66    2.48
   1 -10 -12   -0.24    0.60
   2 -10 -12   13.21    1.46
  -3  -9 -12   81.89    1.95
  -2  -9 -12   92.70    1.83
  -1  -9 -12   10.65    0.71
   0  -9 -12    1.47    0.45
   1  -9 -12    2.98    0.52
   2  -9 -12  123.01    2.13
   3  -9 -12   43.10    1.73
  -3  -8 -12   15.17    1.36
  -2  -8 -12   42.95    1.38
  -1  -8 -12   26.53    0.78
   0  -8 -12  325.29    1.80
   1  -8 -12    4.83    0.48
   2  -8 -12   63.12    1.61
   3  -8 -12   25.67    1.50
  -3  -7 -12   53.50    1.70
  -2  -7 -12  153.18    2.06
  -1  -7 -12  144.31    1.57
   0  -7 -12    0.93    0.36
   1  -7 -12   35.75    0.60
   2  -7 -12   89.21    1.65
   3  -7 -12   40.55    1.55
  -3  -6 -12   11.58    1.27
  -2  -6 -12    4.96    0.72
  -1  -6 -12   13.57    0.86
   0  -6 -12  213.55    1.03
   1  -6 -12   21.17    0.65
   2  -6 -12  134.42    1.30
   3  -6 -12   26.66    1.37
  -3  -5 -12    5.67    0.86
  -2  -5 -12   61.08    1.31
  -1  -5 -12  299.40    2.33
   0  -5 -12    0.30    0.31
   1  -5 -12   70.84    0.84
   2  -5 -12   11.50    0.66
   3  -5 -12    5.24    0.99
   4  -5 -12   32.59    1.70
  -4  -4 -12   12.94    1.45
  -3  -4 -12   19.23    1.23
  -2  -4 -12   22.61    0.95
  -1  -4 -12   50.43    1.09
   0  -4 -12   23.13    0.55
   1  -4 -12   50.69    0.70
   2  -4 -12   54.49    0.86
   3  -4 -12   56.83    1.10
   4  -4 -12   18.05    1.47
  -4  -3 -12   45.10    1.67
  -3  -3 -12    4.43    0.76
  -2  -3 -12    0.70    0.54
  -1  -3 -12  163.99    1.65
   0  -3 -12    3.45    0.34
   1  -3 -12  541.93    1.86
   2  -3 -12   12.05    0.59
   3  -3 -12    8.35    0.68
   4  -3 -12   25.09    1.55
  -4  -2 -12   31.55    1.51
  -3  -2 -12   95.17    1.66
  -2  -2 -12  255.49    2.10
  -1  -2 -12  178.04    1.67
   0  -2 -12    0.47    0.29
   1  -2 -12  113.68    0.83
   2  -2 -12   46.10    0.76
   3  -2 -12  153.08    1.45
   4  -2 -12   60.83    1.80
  -4  -1 -12  103.11    2.00
  -3  -1 -12   17.51    1.07
  -2  -1 -12   29.62    0.96
  -1  -1 -12  421.14    1.61
   0  -1 -12    4.04    0.35
   1  -1 -12 1255.57    2.59
   2  -1 -12    0.66    0.36
   3  -1 -12    4.98    0.58
   4  -1 -12  111.57    1.57
  -4   0 -12   54.86    1.62
  -3   0 -12  189.07    2.11
  -2   0 -12  414.99    3.22
  -1   0 -12  489.38    1.73
   0   0 -12    6.44    0.43
   1   0 -12  422.76    2.51
   2   0 -12  115.47    1.01
   3   0 -12  206.49    1.59
   4   0 -12   86.63    1.44
  -4   1 -12  103.98    1.93
  -3   1 -12   17.17    0.79
  -2   1 -12   29.49    0.70
  -1   1 -12  423.21    2.44
   0   1 -12    3.92    0.34
   1   1 -12 1264.92    4.32
   2   1 -12    1.45    0.37
   3   1 -12    5.73    0.58
   4   1 -12  114.29    1.56
  -3   2 -12   97.16    1.15
  -2   2 -12  263.48    1.45
  -1   2 -12  177.02    1.13
   0   2 -12   -0.07    0.29
   1   2 -12  110.27    0.78
   2   2 -12   44.40    0.75
   3   2 -12  157.66    1.42
   4   2 -12   63.57    1.86
  -3   3 -12    3.09    0.88
  -2   3 -12    1.32    0.40
  -1   3 -12  164.75    1.09
   0   3 -12    2.82    0.57
   1   3 -12  541.69    1.71
   2   3 -12   12.81    0.61
   3   3 -12    9.44    0.75
   4   3 -12   30.01    1.59
  -3   4 -12   13.91    1.32
  -2   4 -12   23.25    0.65
  -1   4 -12   51.97    0.72
   0   4 -12   19.96    1.03
   1   4 -12   50.45    0.87
   2   4 -12   56.02    0.87
   3   4 -12   59.64    1.04
   4   4 -12   21.76    1.55
  -4   5 -12   15.41    1.45
  -3   5 -12    3.38    0.95
  -2   5 -12   62.64    1.62
  -1   5 -12  299.29    1.40
   0   5 -12   -0.28    0.40
   1   5 -12   67.72    0.89
   2   5 -12   12.42    0.69
   3   5 -12    5.75    0.97
   4   5 -12   40.20    1.82
  -3   6 -12    6.84    1.10
  -2   6 -12    4.08    0.96
  -1   6 -12   12.53    1.18
   0   6 -12  196.39    2.09
   1   6 -12   21.22    0.75
   2   6 -12  135.08    1.71
   3   6 -12   27.58    1.42
   4   6 -12    2.25    1.16
  -3   7 -12   43.42    1.80
  -2   7 -12  154.29    2.38
  -1   7 -12  137.81    2.02
   0   7 -12    1.21    0.47
   1   7 -12   37.83    0.89
   2   7 -12   95.70    1.20
   3   7 -12   46.16    1.68
  -3   8 -12    9.51    1.30
  -2   8 -12   41.37    1.77
  -1   8 -12   26.50    1.47
   0   8 -12  313.58    1.81
   1   8 -12    6.34    0.65
   2   8 -12   67.63    1.66
   3   8 -12   31.47    1.67
  -3   9 -12   69.72    2.27
  -2   9 -12   84.99    2.17
  -1   9 -12   11.87    1.14
   0   9 -12    1.17    0.58
   1   9 -12    6.34    0.79
   2   9 -12  129.46    2.18
   3   9 -12   50.35    1.87
  -2  10 -12   12.97    1.40
  -1  10 -12   24.48    1.62
   0  10 -12  229.21    3.45
   1  10 -12    2.24    0.85
   2  10 -12   13.54    1.46
   3  10 -12    5.86    1.35
  -2  11 -12   32.84    2.05
  -1  11 -12    0.93    1.08
   0  11 -12    2.42    0.95
   1  11 -12    3.19    1.14
   2  11 -12   44.24    1.78
  -1  12 -12    2.11    1.16
   0  12 -12  133.26    2.32
   2  12 -12    3.20    1.37
   0 -13 -11    0.05    0.79
  -1 -12 -11   24.63    1.47
   0 -12 -11    0.96    0.74
  -2 -11 -11   10.92    0.85
  -1 -11 -11    0.87    0.73
   0 -11 -11   17.79    1.21
   1 -11 -11    0.50    0.66
   2 -11 -11   19.17    1.52
  -2 -10 -11   69.09    1.20
  -1 -10 -11    0.46    0.46
   0 -10 -11    9.59    1.04
   1 -10 -11    0.06    0.58
   2 -10 -11   12.35    1.43
  -3  -9 -11    5.52    0.97
  -2  -9 -11   20.29    0.84
  -1  -9 -11    4.56    0.50
   0  -9 -11  158.57    1.35
   1  -9 -11   30.19    0.81
   2  -9 -11    5.58    1.06
   3  -9 -11    2.01    1.13
  -3  -8 -11   14.62    1.36
  -2  -8 -11   98.95    1.75
  -1  -8 -11   66.38    0.98
   0  -8 -11    0.78    0.37
   1  -8 -11   18.34    0.67
   2  -8 -11   52.14    1.50
   3  -8 -11   51.40    1.72
  -3  -7 -11   16.99    1.37
  -2  -7 -11   51.35    1.33
  -1  -7 -11    1.22    0.36
   0  -7 -11  388.39    1.80
   1  -7 -11    5.66    0.47
   2  -7 -11   80.58    1.59
   3  -7 -11    8.40    1.13
  -3  -6 -11   30.25    1.35
  -2  -6 -11   33.33    1.13
  -1  -6 -11  123.99    1.11
   0  -6 -11   75.48    0.86
   1  -6 -11   29.89    0.52
   2  -6 -11  121.99    1.23
   3  -6 -11   67.86    1.69
   4  -6 -11    6.48    1.33
  -4  -5 -11   19.88    1.54
  -3  -5 -11   21.04    1.22
  -2  -5 -11   52.76    1.24
  -1  -5 -11    6.32    0.64
   0  -5 -11  213.77    0.95
   1  -5 -11   40.46    0.68
   2  -5 -11   99.13    1.08
   3  -5 -11   23.27    1.26
   4  -5 -11   27.54    1.61
  -4  -4 -11   11.39    1.42
  -3  -4 -11   12.10    1.08
  -2  -4 -11   52.59    1.19
  -1  -4 -11   38.07    0.94
   0  -4 -11  110.40    0.86
   1  -4 -11    3.37    0.36
   2  -4 -11   61.87    0.88
   3  -4 -11  101.01    1.28
   4  -4 -11   16.56    1.46
  -4  -3 -11   28.46    1.55
  -3  -3 -11    7.37    0.84
  -2  -3 -11    9.13    0.78
  -1  -3 -11   39.86    0.91
   0  -3 -11   66.21    0.69
   1  -3 -11  186.33    1.05
   2  -3 -11   33.67    0.71
   3  -3 -11   15.98    0.80
   4  -3 -11    7.98    1.26
  -4  -2 -11   15.68    1.33
  -3  -2 -11    1.02    0.65
  -2  -2 -11   36.30    1.00
  -1  -2 -11   47.96    0.94
   0  -2 -11   35.25    0.56
   1  -2 -11   60.18    0.63
   2  -2 -11   16.65    0.59
   3  -2 -11   97.41    1.22
   4  -2 -11   12.27    1.38
  -4  -1 -11   12.49    1.30
  -3  -1 -11    2.75    0.67
  -2  -1 -11    0.83    0.48
  -1  -1 -11  128.72    0.90
   0  -1 -11   15.37    0.45
   1  -1 -11   37.30    0.50
   2  -1 -11   15.67    0.57
   3  -1 -11    2.16    0.52
   4  -1 -11   14.71    1.34
  -4   0 -11    2.38    0.81
  -3   0 -11    1.64    0.62
  -2   0 -11   -0.06    0.35
  -1   0 -11    0.17    0.28
   0   0 -11    0.10    0.24
   1   0 -11    0.17    0.21
   2   0 -11    0.34    0.36
   3   0 -11    0.52    0.49
   4   0 -11    2.71    0.71
  -4   1 -11   12.64    1.15
  -3   1 -11    1.57    0.47
  -2   1 -11    0.23    0.37
  -1   1 -11  132.15    0.94
   0   1 -11   14.40    0.46
   1   1 -11   37.80    0.95
   2   1 -11   15.01    0.55
   3   1 -11    2.45    0.52
   4   1 -11    5.44    1.03
  -3   2 -11    0.20    0.47
  -2   2 -11   37.07    0.72
  -1   2 -11   46.78    0.66
   0   2 -11   33.91    0.57
   1   2 -11   57.72    0.60
   2   2 -11   16.68    0.59
   3   2 -11   95.84    1.15
   4   2 -11   14.19    1.44
  -3   3 -11    5.49    0.88
  -2   3 -11   10.98    0.57
  -1   3 -11   42.79    0.65
   0   3 -11   64.47    1.17
   1   3 -11  185.06    1.05
   2   3 -11   33.56    0.71
   3   3 -11   17.88    0.78
   4   3 -11   13.48    1.46
  -3   4 -11    8.19    0.96
  -2   4 -11   52.35    0.76
  -1   4 -11   39.03    0.62
   0   4 -11  105.41    1.45
   1   4 -11    3.46    0.40
   2   4 -11   62.15    0.89
   3   4 -11  106.21    1.25
   4   4 -11   21.39    1.59
  -4   5 -11    9.00    1.24
  -3   5 -11   15.47    1.30
  -2   5 -11   50.58    1.45
  -1   5 -11    5.81    0.79
   0   5 -11  221.76    1.86
   1   5 -11   40.23    0.77
   2   5 -11   99.35    1.09
   3   5 -11   26.65    1.33
   4   5 -11   31.63    1.72
  -4   6 -11    2.13    1.18
  -3   6 -11   23.61    1.44
  -2   6 -11   32.14    1.39
  -1   6 -11  128.54    1.84
   0   6 -11   75.47    1.01
   1   6 -11   29.86    0.84
   2   6 -11  122.74    1.23
   3   6 -11   75.29    1.80
   4   6 -11    7.43    1.26
  -3   7 -11    9.62    1.16
  -2   7 -11   49.45    1.59
  -1   7 -11    1.51    0.80
   0   7 -11  392.12    3.70
   1   7 -11    6.44    0.58
   2   7 -11   83.64    1.12
   3   7 -11    9.57    1.23
  -3   8 -11    6.53    1.18
  -2   8 -11   91.95    1.99
  -1   8 -11   64.23    1.70
   0   8 -11    1.02    0.51
   1   8 -11   18.55    0.85
   2   8 -11   58.29    1.62
   3   8 -11   57.69    1.88
  -3   9 -11   -0.08    1.16
  -2   9 -11   16.71    1.63
  -1   9 -11    6.13    0.62
   0   9 -11  157.58    1.71
   1   9 -11   30.29    0.93
   2   9 -11    6.12    1.12
   3   9 -11    1.93    1.18
  -2  10 -11   64.40    2.17
  -1  10 -11    1.40    0.61
   0  10 -11   13.57    1.08
   1  10 -11    1.33    0.66
   2  10 -11   14.21    1.35
   3  10 -11   23.28    1.76
  -2  11 -11    7.19    1.34
  -1  11 -11    2.16    0.73
   0  11 -11   19.36    0.99
   1  11 -11    0.09    1.03
   2  11 -11   18.85    1.59
  -1  12 -11   25.37    1.85
   0  12 -11    3.23    1.08
   1  12 -11    2.53    1.20
   2  12 -11   -1.72    1.20
  -1  13 -11    3.04    1.23
   1  13 -11   18.34    1.67
   0 -13 -10    4.19    0.90
  -1 -12 -10   19.52    1.37
   0 -12 -10   39.15    1.50
   1 -12 -10    2.46    0.75
   2 -12 -10    6.07    1.38
  -2 -11 -10   21.35    0.98
  -1 -11 -10    4.11    0.80
   0 -11 -10   30.61    1.30
   1 -11 -10  218.75    2.27
   2 -11 -10   16.38    1.50
  -3 -10 -10    2.30    0.88
  -2 -10 -10  254.85    1.94
  -1 -10 -10    9.44    0.63
   0 -10 -10   55.16    1.40
   1 -10 -10    2.17    0.52
   2 -10 -10   18.21    1.45
   3 -10 -10   65.30    2.10
  -3  -9 -10    1.58    0.88
  -2  -9 -10   29.84    0.89
  -1  -9 -10   10.04    0.67
   0  -9 -10  131.89    1.33
   1  -9 -10  200.15    1.61
   2  -9 -10   26.29    1.39
   3  -9 -10   32.85    1.67
  -3  -8 -10    7.41    0.98
  -2  -8 -10  189.24    1.55
  -1  -8 -10   41.40    0.81
   0  -8 -10   73.27    0.91
   1  -8 -10    8.86    0.60
   2  -8 -10   -0.06    0.83
   3  -8 -10   74.28    1.89
  -3  -7 -10    6.34    0.92
  -2  -7 -10   39.88    1.23
  -1  -7 -10   31.80    0.70
   0  -7 -10   45.72    0.74
   1  -7 -10  182.66    1.26
   2  -7 -10   65.33    1.46
   3  -7 -10   40.18    1.55
  -3  -6 -10   34.62    1.39
  -2  -6 -10   52.30    1.27
  -1  -6 -10   46.57    0.75
   0  -6 -10  292.31    1.46
   1  -6 -10   20.17    0.47
   2  -6 -10   42.77    1.19
   3  -6 -10   40.75    1.45
   4  -6 -10    0.74    1.16
  -4  -5 -10   39.20    1.68
  -3  -5 -10   46.89    1.40
  -2  -5 -10   26.62    0.97
  -1  -5 -10  104.03    1.37
   0  -5 -10    6.07    0.33
   1  -5 -10  150.89    0.97
   2  -5 -10  184.33    1.36
   3  -5 -10   20.66    1.21
   4  -5 -10   23.76    1.61
  -4  -4 -10    7.69    1.04
  -3  -4 -10   78.44    1.56
  -2  -4 -10    3.69    0.59
  -1  -4 -10   25.25    0.80
   0  -4 -10  313.16    1.65
   1  -4 -10   49.01    0.65
   2  -4 -10  328.18    1.68
   3  -4 -10   35.71    1.29
   4  -4 -10    1.96    1.15
  -4  -3 -10   15.10    1.34
  -3  -3 -10   42.91    1.26
  -2  -3 -10   21.39    0.84
  -1  -3 -10  892.21    3.35
   0  -3 -10   28.77    0.78
   1  -3 -10   25.33    0.50
   2  -3 -10   46.52    0.76
   3  -3 -10    0.57    0.52
   4  -3 -10  135.43    2.41
  -4  -2 -10   22.18    1.37
  -3  -2 -10  170.98    1.98
  -2  -2 -10    5.18    0.58
  -1  -2 -10    1.30    0.40
   0  -2 -10  191.61    1.01
   1  -2 -10  489.83    2.02
   2  -2 -10  642.16    2.15
   3  -2 -10   16.68    0.78
   4  -2 -10    3.68    1.11
  -4  -1 -10    3.69    0.86
  -3  -1 -10   64.38    1.35
  -2  -1 -10   29.41    0.84
  -1  -1 -10 1018.40   10.96
   0  -1 -10  336.73    1.31
   1  -1 -10    8.96    0.33
   2  -1 -10   34.38    0.66
   3  -1 -10    6.52    0.58
   4  -1 -10  194.57    2.62
  -4   0 -10   14.57    1.22
  -3   0 -10  255.92    2.22
  -2   0 -10   13.54    0.55
  -1   0 -10   35.40    0.55
   0   0 -10  320.09    2.34
   1   0 -10  590.32    1.53
   2   0 -10  490.20    1.83
   3   0 -10    0.70    0.46
   4   0 -10   12.55    1.30
  -4   1 -10    3.54    0.82
  -3   1 -10   62.88    0.99
  -2   1 -10   32.20    0.67
  -1   1 -10 1073.21    2.49
   0   1 -10  343.05    1.35
   1   1 -10    9.64    0.34
   2   1 -10   34.80    0.66
   3   1 -10    6.25    0.55
   4   1 -10  200.76    1.88
  -3   2 -10  170.75    1.34
  -2   2 -10    5.52    0.47
  -1   2 -10    1.14    0.29
   0   2 -10  191.45    2.56
   1   2 -10  487.47    2.51
   2   2 -10  635.77    4.32
   3   2 -10   16.55    0.76
   4   2 -10    3.69    1.10
  -3   3 -10   43.44    0.89
  -2   3 -10   22.54    0.62
  -1   3 -10  902.75    2.46
   0   3 -10   31.79    0.91
   1   3 -10   25.72    0.53
   2   3 -10   45.77    0.76
   3   3 -10    1.44    0.49
   4   3 -10  147.53    2.55
  -4   4 -10    0.79    1.03
  -3   4 -10   75.60    1.62
  -2   4 -10    4.52    0.40
  -1   4 -10   26.27    0.53
   0   4 -10  323.18    1.97
   1   4 -10   48.90    1.02
   2   4 -10  328.28    1.65
   3   4 -10   36.81    0.89
   4   4 -10    3.58    1.20
  -4   5 -10   22.67    1.64
  -3   5 -10   43.71    1.60
  -2   5 -10   25.19    1.17
  -1   5 -10  104.57    1.60
   0   5 -10    5.70    0.45
   1   5 -10  153.06    3.05
   2   5 -10  186.10    1.35
   3   5 -10   20.60    1.28
   4   5 -10   27.28    1.65
  -3   6 -10   30.39    1.60
  -2   6 -10   48.22    1.42
  -1   6 -10   49.03    1.40
   0   6 -10  289.79    1.96
   1   6 -10   19.37    0.74
   2   6 -10   45.49    0.88
   3   6 -10   43.69    1.58
   4   6 -10    2.25    1.10
  -3   7 -10    1.73    1.05
  -2   7 -10   33.18    1.37
  -1   7 -10   32.95    1.34
   0   7 -10   46.19    0.86
   1   7 -10  186.29    2.23
   2   7 -10   68.71    1.03
   3   7 -10   42.58    1.68
  -3   8 -10    4.11    1.10
  -2   8 -10  181.12    2.40
  -1   8 -10   41.48    1.50
   0   8 -10   74.65    1.06
   1   8 -10   10.39    0.71
   2   8 -10    0.21    0.89
   3   8 -10   79.76    2.03
  -3   9 -10   -1.88    1.05
  -2   9 -10   25.17    1.55
  -1   9 -10   10.64    1.08
   0   9 -10  129.47    1.32
   1   9 -10  187.91    1.80
   2   9 -10   26.48    1.43
   3   9 -10   33.48    1.79
  -2  10 -10  236.82    2.95
  -1  10 -10    9.65    0.79
   0  10 -10   52.37    1.09
   1  10 -10    1.15    0.96
   2  10 -10   16.78    1.50
   3  10 -10   71.03    2.16
  -2  11 -10   16.32    1.82
  -1  11 -10    6.20    0.76
   0  11 -10   30.10    1.09
   1  11 -10  207.46    2.72
   2  11 -10   18.03    1.64
  -1  12 -10   16.99    1.15
   0  12 -10   40.02    1.35
   1  12 -10    2.33    1.18
   2  12 -10    5.13    1.40
  -1  13 -10   -0.06    0.78
   0  13 -10    1.39    0.92
   1  13 -10   82.03    2.20
  -1 -13  -9    5.02    0.91
   0 -13  -9   41.96    1.56
   1 -13  -9   21.27    1.38
  -2 -12  -9   19.38    1.45
  -1 -12  -9   29.24    1.44
   0 -12  -9    7.65    0.90
   1 -12  -9    8.13    0.87
   2 -12  -9   16.91    1.63
  -2 -11  -9    6.60    0.91
  -1 -11  -9    3.25    0.74
   0 -11  -9   48.94    1.40
   1 -11  -9   16.84    1.10
   2 -11  -9    1.17    1.20
  -3 -10  -9    2.92    0.90
  -2 -10  -9   53.97    1.09
  -1 -10  -9    6.87    0.58
   0 -10  -9    0.70    0.59
   1 -10  -9   89.23    1.17
   2 -10  -9   -0.02    1.03
   3 -10  -9   14.90    1.65
  -3  -9  -9    1.56    0.83
  -2  -9  -9   39.98    0.93
  -1  -9  -9   44.98    0.86
   0  -9  -9    2.25    0.41
   1  -9  -9    1.46    0.43
   2  -9  -9   11.24    1.17
   3  -9  -9   17.49    1.56
  -3  -8  -9   23.54    1.39
  -2  -8  -9    4.67    0.51
  -1  -8  -9    0.51    0.34
   0  -8  -9    3.24    0.37
   1  -8  -9  259.63    1.54
   2  -8  -9    0.42    0.82
   3  -8  -9    2.24    1.06
  -3  -7  -9    1.14    0.77
  -2  -7  -9  156.35    1.34
  -1  -7  -9   18.75    0.59
   0  -7  -9   79.31    0.86
   1  -7  -9    0.39    0.33
   2  -7  -9   10.79    1.00
   3  -7  -9   73.31    1.80
  -4  -6  -9   34.63    1.64
  -3  -6  -9   42.48    1.39
  -2  -6  -9   11.99    0.86
  -1  -6  -9    5.90    0.48
   0  -6  -9  153.97    0.80
   1  -6  -9  341.92    1.50
   2  -6  -9    3.06    0.74
   3  -6  -9    8.58    1.06
   4  -6  -9    0.14    1.16
  -4  -5  -9   23.92    1.53
  -3  -5  -9    8.84    1.02
  -2  -5  -9  199.94    1.92
  -1  -5  -9  196.99    1.20
   0  -5  -9   22.67    0.38
   1  -5  -9    8.71    0.35
   2  -5  -9   50.72    0.83
   3  -5  -9  174.91    2.22
   4  -5  -9   17.70    1.54
  -4  -4  -9   45.95    1.70
  -3  -4  -9   90.50    1.64
  -2  -4  -9    5.20    0.59
  -1  -4  -9   10.03    0.62
   0  -4  -9  580.07    1.48
   1  -4  -9  208.08    0.83
   2  -4  -9  114.44    1.06
   3  -4  -9    2.21    0.81
   4  -4  -9    0.71    1.12
  -4  -3  -9   13.34    1.35
  -3  -3  -9    1.39    0.64
  -2  -3  -9   64.86    1.16
  -1  -3  -9  600.19    2.65
   0  -3  -9    9.38    0.35
   1  -3  -9    4.02    0.30
   2  -3  -9    6.31    0.46
   3  -3  -9   86.17    1.14
   4  -3  -9   33.28    1.65
  -4  -2  -9   16.97    1.36
  -3  -2  -9   93.38    1.56
  -2  -2  -9   -0.14    0.44
  -1  -2  -9   21.65    0.65
   0  -2  -9   20.27    0.42
   1  -2  -9   62.13    0.59
   2  -2  -9  100.97    0.94
   3  -2  -9    0.78    0.47
   4  -2  -9    3.64    1.11
  -4  -1  -9    1.26    0.86
  -3  -1  -9    8.21    0.93
  -2  -1  -9    3.58    0.51
  -1  -1  -9  102.45    0.73
   0  -1  -9   31.58    0.46
   1  -1  -9   15.67    0.36
   2  -1  -9   15.59    0.53
   3  -1  -9    4.49    0.53
   4  -1  -9   17.17    1.39
  -4   0  -9    1.30    0.81
  -3   0  -9    0.69    0.59
  -2   0  -9    0.05    0.32
  -1   0  -9   -0.06    0.24
   0   0  -9    0.10    0.22
   1   0  -9    0.05    0.19
   2   0  -9    0.15    0.32
   3   0  -9    0.43    0.45
   4   0  -9    3.16    1.00
  -4   1  -9    1.27    0.78
  -3   1  -9    6.87    0.59
  -2   1  -9    3.83    0.38
  -1   1  -9  106.53    0.78
   0   1  -9   31.89    0.51
   1   1  -9   14.90    0.35
   2   1  -9   16.07    0.55
   3   1  -9    4.39    0.52
   4   1  -9   16.09    1.47
  -3   2  -9   93.38    1.06
  -2   2  -9    0.23    0.34
  -1   2  -9   21.53    0.46
   0   2  -9   19.87    0.43
   1   2  -9   62.12    0.64
   2   2  -9   96.41    1.08
   3   2  -9    1.37    0.47
   4   2  -9    2.66    1.08
  -3   3  -9    0.84    0.44
  -2   3  -9   65.34    0.76
  -1   3  -9  610.96    1.69
   0   3  -9    8.31    0.71
   1   3  -9    4.35    0.35
   2   3  -9    6.32    0.45
   3   3  -9   87.52    1.16
   4   3  -9   37.65    1.72
  -4   4  -9   32.43    1.65
  -3   4  -9   85.22    1.73
  -2   4  -9    5.78    0.47
  -1   4  -9   10.22    0.40
   0   4  -9  602.27    7.25
   1   4  -9  209.99    3.95
   2   4  -9  116.08    1.05
   3   4  -9    2.60    0.50
   4   4  -9    1.19    1.12
  -4   5  -9   13.90    1.34
  -2   5  -9  216.60    2.22
  -1   5  -9  207.89    1.99
   0   5  -9   23.46    0.59
   1   5  -9    8.21    0.58
   2   5  -9   51.66    0.84
   3   5  -9  178.32    2.31
   4   5  -9   22.41    1.63
  -4   6  -9   23.91    1.88
  -3   6  -9   35.28    1.51
  -2   6  -9   12.54    1.21
  -1   6  -9    7.19    0.83
   0   6  -9  154.31    1.21
   1   6  -9  337.86    2.55
   2   6  -9    3.92    0.49
   3   6  -9    8.23    1.12
   4   6  -9    2.43    1.20
  -3   7  -9   -2.57    0.92
  -2   7  -9  160.05    2.17
  -1   7  -9   20.47    1.24
   0   7  -9   79.31    0.98
   1   7  -9    1.02    0.47
   2   7  -9   12.33    0.71
   3   7  -9   74.88    1.91
  -3   8  -9   15.14    1.69
  -2   8  -9    3.07    0.89
  -1   8  -9   -0.18    0.82
   0   8  -9    3.56    0.53
   1   8  -9  246.37    4.03
   2   8  -9   -0.16    0.88
   3   8  -9    3.17    1.17
  -3   9  -9   -2.65    1.11
  -2   9  -9   35.14    1.54
  -1   9  -9   42.83    1.64
   0   9  -9    2.35    0.56
   1   9  -9    0.21    0.86
   2   9  -9   10.68    1.22
   3   9  -9   22.20    1.70
  -2  10  -9   48.94    1.77
  -1  10  -9    8.58    0.71
   0  10  -9    0.64    0.58
   1  10  -9   87.82    1.89
   2  10  -9   -1.83    1.09
   3  10  -9   17.58    1.79
  -2  11  -9    3.75    1.20
  -1  11  -9    4.71    0.72
   0  11  -9   47.63    1.13
   1  11  -9   13.78    1.41
   2  11  -9    0.87    1.24
  -2  12  -9   15.18    1.60
  -1  12  -9   27.43    1.18
   0  12  -9    9.76    0.91
   1  12  -9    7.90    1.32
   2  12  -9   18.13    1.80
  -1  13  -9    5.12    0.89
   0  13  -9   32.69    1.59
   1  13  -9   15.82    1.66
  -1 -13  -8   81.30    1.97
   0 -13  -8    1.73    0.80
   1 -13  -8  117.93    2.04
  -2 -12  -8   48.25    1.77
  -1 -12  -8   57.74    1.68
   0 -12  -8   21.54    1.28
   1 -12  -8   41.77    1.36
   2 -12  -8   32.66    1.80
  -2 -11  -8    6.57    0.91
  -1 -11  -8  251.77    2.65
   0 -11  -8    3.65    0.70
   1 -11  -8  290.79    2.49
   2 -11  -8    8.44    1.37
  -3 -10  -8   39.40    1.59
  -2 -10  -8   46.37    1.02
  -1 -10  -8   90.50    1.65
   0 -10  -8    2.13    0.60
   1 -10  -8  124.13    1.52
   2 -10  -8   20.37    1.44
   3 -10  -8   48.94    1.96
  -3  -9  -8    3.13    0.88
  -2  -9  -8    8.80    0.63
  -1  -9  -8  163.00    1.35
   0  -9  -8   -0.08    0.45
   1  -9  -8  175.30    1.36
   2  -9  -8    0.34    0.91
   3  -9  -8    4.85    1.23
  -3  -8  -8   23.69    1.34
  -2  -8  -8   16.71    0.72
  -1  -8  -8   79.50    0.94
   0  -8  -8   73.32    0.84
   1  -8  -8  128.83    1.11
   2  -8  -8    7.71    0.95
   3  -8  -8   21.10    1.47
  -3  -7  -8    5.78    0.88
  -2  -7  -8    3.25    0.43
  -1  -7  -8   46.60    0.74
   0  -7  -8    0.22    0.29
   1  -7  -8   71.11    0.82
   2  -7  -8    0.28    0.70
   3  -7  -8    4.02    1.02
  -4  -6  -8    2.30    0.98
  -3  -6  -8   40.71    1.37
  -2  -6  -8   85.89    0.99
  -1  -6  -8   51.42    0.72
   0  -6  -8  256.01    1.27
   1  -6  -8   16.59    0.50
   2  -6  -8  103.10    1.57
   3  -6  -8   93.65    1.83
   4  -6  -8    2.51    1.20
  -4  -5  -8   51.13    1.81
  -3  -5  -8   50.79    1.39
  -2  -5  -8   90.56    1.35
  -1  -5  -8  112.32    0.90
   0  -5  -8    6.90    0.29
   1  -5  -8  107.05    0.66
   2  -5  -8   47.33    1.14
   3  -5  -8   69.75    1.60
   4  -5  -8   43.41    1.84
  -4  -4  -8    8.05    1.05
  -3  -4  -8   81.72    1.57
  -2  -4  -8  118.89    1.45
  -1  -4  -8    1.68    0.26
   0  -4  -8 1418.84    2.78
   1  -4  -8    4.26    0.26
   2  -4  -8  209.03    1.33
   3  -4  -8  110.77    1.80
   4  -4  -8   13.09    1.49
  -4  -3  -8   30.32    1.53
  -3  -3  -8  194.90    2.11
  -2  -3  -8  253.74    1.96
  -1  -3  -8  134.35    1.25
   0  -3  -8   16.17    0.29
   1  -3  -8   91.92    0.71
   2  -3  -8  479.39    1.86
   3  -3  -8  187.23    2.13
   4  -3  -8   46.82    1.75
  -4  -2  -8   16.69    1.32
  -3  -2  -8   61.83    1.33
  -2  -2  -8   44.46    0.96
  -1  -2  -8   52.89    0.81
   0  -2  -8 1481.82    3.75
   1  -2  -8    6.93    0.32
   2  -2  -8   96.17    0.89
   3  -2  -8   23.56    0.77
   4  -2  -8   32.75    1.67
  -4  -1  -8    1.22    0.83
  -3  -1  -8   94.11    1.50
  -2  -1  -8  350.07    2.12
  -1  -1  -8  118.16    0.72
   0  -1  -8    0.97    0.19
   1  -1  -8   57.11    0.51
   2  -1  -8  469.05    1.72
   3  -1  -8   95.92    1.10
   4  -1  -8   13.73    1.35
  -4   0  -8   19.71    1.30
  -3   0  -8   34.21    1.11
  -2   0  -8   41.47    0.62
  -1   0  -8   86.80    0.66
   0   0  -8  117.12    0.73
   1   0  -8  103.23    0.64
   2   0  -8   76.24    0.78
   3   0  -8   13.23    0.70
   4   0  -8   40.15    1.65
  -4   1  -8    0.47    0.78
  -3   1  -8   95.02    1.04
  -2   1  -8  354.90    5.65
  -1   1  -8  124.65    0.78
   0   1  -8    0.15    0.19
   1   1  -8   57.42    0.56
   2   1  -8  460.84    4.04
   3   1  -8   95.46    1.08
   4   1  -8   14.29    1.46
  -3   2  -8   63.59    0.99
  -2   2  -8   47.46    1.31
  -1   2  -8   56.02    0.57
   0   2  -8 1454.60   12.67
   1   2  -8    6.84    0.35
   2   2  -8   97.87    0.89
   3   2  -8   23.75    0.75
   4   2  -8   28.48    1.58
  -3   3  -8  194.35    1.45
  -2   3  -8  256.55    2.74
  -1   3  -8  139.63    0.95
   0   3  -8   15.94    0.73
   1   3  -8   95.56    0.77
   2   3  -8  495.48    1.86
   3   3  -8  193.05    1.43
   4   3  -8   46.79    1.78
  -4   4  -8    2.67    1.16
  -3   4  -8   77.41    1.57
  -2   4  -8  122.30    2.32
  -1   4  -8    1.58    0.56
   0   4  -8 1468.96    7.95
   1   4  -8    4.91    0.38
   2   4  -8  213.78    1.32
   3   4  -8  115.53    1.24
   4   4  -8   13.99    1.55
  -4   5  -8   42.11    1.93
  -3   5  -8   49.01    1.57
  -2   5  -8  101.43    1.64
  -1   5  -8  120.06    1.52
   0   5  -8    7.33    0.47
   1   5  -8  106.24    3.00
   2   5  -8   51.67    0.83
   3   5  -8   71.82    1.72
   4   5  -8   44.59    1.80
  -4   6  -8   -3.38    1.16
  -3   6  -8   36.32    1.58
  -2   6  -8   87.94    1.59
  -1   6  -8   54.26    1.31
   0   6  -8  253.75    1.37
   1   6  -8   16.25    0.66
   2   6  -8  108.17    1.08
   3   6  -8   97.33    1.98
   4   6  -8    3.67    1.33
  -4   7  -8   22.82    1.93
  -3   7  -8    1.77    1.09
  -2   7  -8    2.46    0.79
  -1   7  -8   48.30    1.36
   0   7  -8    0.55    0.43
   1   7  -8   68.59    1.46
   2   7  -8    0.41    0.81
   3   7  -8    4.35    1.09
   4   7  -8   29.92    1.94
  -3   8  -8   16.05    1.57
  -2   8  -8   16.89    1.41
  -1   8  -8   80.38    1.63
   0   8  -8   72.16    1.00
   1   8  -8  125.88    2.34
   2   8  -8    7.28    1.05
   3   8  -8   21.48    1.63
  -3   9  -8   -1.73    1.04
  -2   9  -8    5.97    1.08
  -1   9  -8  163.74    2.17
   0   9  -8    0.80    0.52
   1   9  -8  169.68    1.79
   2   9  -8   -0.91    0.97
   3   9  -8    5.73    1.33
  -3  10  -8   29.16    1.96
  -2  10  -8   38.82    1.66
  -1  10  -8   89.82    1.96
   0  10  -8    3.07    0.62
   1  10  -8  124.26    2.11
   2  10  -8   18.15    1.59
   3  10  -8   52.73    2.06
  -2  11  -8    3.90    1.11
  -1  11  -8  252.83    1.99
   0  11  -8    4.46    0.68
   1  11  -8  276.98    3.06
   2  11  -8    6.02    1.35
  -2  12  -8   37.39    1.97
  -1  12  -8   53.94    1.30
   0  12  -8   19.82    1.44
   1  12  -8   36.42    1.74
   2  12  -8   31.50    1.92
  -1  13  -8   77.18    1.53
   0  13  -8   -0.69    1.08
   1  13  -8  106.54    2.43
   0  14  -8    1.23    1.29
   1 -14  -7    1.86    0.82
  -1 -13  -7   15.29    1.31
   0 -13  -7   86.30    1.90
   1 -13  -7    2.27    0.75
  -2 -12  -7   28.93    1.52
  -1 -12  -7   11.69    1.17
   0 -12  -7   19.24    1.21
   1 -12  -7   18.43    1.12
   2 -12  -7   24.94    1.74
  -3 -11  -7    4.67    0.82
  -2 -11  -7   10.47    1.24
  -1 -11  -7   53.19    1.48
   0 -11  -7   67.37    1.48
   1 -11  -7    2.06    0.58
   2 -11  -7   15.63    1.56
  -3 -10  -7    2.69    0.61
  -2 -10  -7    1.44    0.47
  -1 -10  -7   55.26    1.38
   0 -10  -7    0.27    0.54
   1 -10  -7   52.10    0.94
   2 -10  -7   34.96    1.56
   3 -10  -7    1.03    1.22
  -3  -9  -7   28.78    1.39
  -2  -9  -7    1.29    0.43
  -1  -9  -7   19.07    0.64
   0  -9  -7    5.83    0.60
   1  -9  -7    9.62    0.63
   2  -9  -7   35.50    1.43
   3  -9  -7   -0.37    1.09
  -3  -8  -7   10.06    1.14
  -2  -8  -7    1.65    0.42
  -1  -8  -7  157.56    1.19
   0  -8  -7    1.74    0.32
   1  -8  -7   13.01    0.58
   2  -8  -7    1.11    0.79
   3  -8  -7   20.15    1.47
  -3  -7  -7   48.85    1.48
  -2  -7  -7    3.39    0.42
  -1  -7  -7    0.88    0.30
   0  -7  -7   83.17    0.80
   1  -7  -7   26.26    0.60
   2  -7  -7   99.14    1.64
   3  -7  -7    0.53    0.93
   4  -7  -7   11.31    1.47
  -4  -6  -7    1.46    0.94
  -3  -6  -7    5.41    0.85
  -2  -6  -7   23.86    0.66
  -1  -6  -7  395.52    1.63
   0  -6  -7   60.96    0.67
   1  -6  -7   15.66    0.47
   2  -6  -7   13.54    0.94
   3  -6  -7   74.01    1.70
   4  -6  -7   41.28    1.86
  -4  -5  -7   25.84    1.53
  -3  -5  -7  151.22    2.01
  -2  -5  -7   13.09    0.81
  -1  -5  -7    1.44    0.26
   0  -5  -7  155.19    0.91
   1  -5  -7  468.21    1.28
   2  -5  -7  252.79    2.13
   3  -5  -7    1.98    0.83
   4  -5  -7   31.48    1.71
  -4  -4  -7    0.87    0.92
  -3  -4  -7    1.27    0.69
  -2  -4  -7  155.05    1.60
  -1  -4  -7  446.21    1.96
   0  -4  -7  776.68    3.02
   1  -4  -7   98.24    0.56
   2  -4  -7   26.60    0.65
   3  -4  -7  194.53    2.24
   4  -4  -7   52.41    1.88
  -4  -3  -7   22.89    1.50
  -3  -3  -7  121.31    1.77
  -2  -3  -7   52.88    1.03
  -1  -3  -7    7.15    0.47
   0  -3  -7   64.93    0.45
   1  -3  -7  785.86    1.99
   2  -3  -7  169.62    1.14
   3  -3  -7    1.67    0.74
   4  -3  -7   29.52    1.59
  -4  -2  -7    1.14    0.90
  -3  -2  -7    2.08    0.69
  -2  -2  -7   27.10    0.81
  -1  -2  -7  140.84    1.18
   0  -2  -7  230.95    0.73
   1  -2  -7    2.73    0.24
   2  -2  -7   51.79    0.78
   3  -2  -7   58.26    0.95
   4  -2  -7   19.96    1.48
  -4  -1  -7    4.71    0.91
  -3  -1  -7    7.70    0.76
  -2  -1  -7   24.57    0.76
  -1  -1  -7    4.01    0.37
   0  -1  -7    3.60    0.27
   1  -1  -7   72.50    0.55
   2  -1  -7   11.25    0.48
   3  -1  -7    4.11    0.50
   4  -1  -7    5.49    1.09
  -4   0  -7    1.46    0.81
  -3   0  -7    0.06    0.58
  -2   0  -7    0.56    0.31
  -1   0  -7    0.30    0.21
   0   0  -7    0.08    0.19
   1   0  -7   -0.17    0.18
   2   0  -7    0.37    0.29
   3   0  -7    0.68    0.43
   4   0  -7    2.31    1.02
  -4   1  -7    5.29    0.88
  -3   1  -7    6.81    0.56
  -2   1  -7   26.89    0.60
  -1   1  -7    3.96    0.31
   0   1  -7    3.42    0.25
   1   1  -7   72.90    0.56
   2   1  -7   11.90    0.47
   3   1  -7    3.47    0.46
   4   1  -7    4.99    1.11
  -4   2  -7    1.70    0.78
  -3   2  -7    0.25    0.42
  -2   2  -7   27.95    0.56
  -1   2  -7  140.03    0.77
   0   2  -7  233.99    1.49
   1   2  -7    2.68    0.27
   2   2  -7   52.50    0.69
   3   2  -7   56.66    0.88
   4   2  -7   20.87    1.55
  -4   3  -7   13.96    1.22
  -3   3  -7  117.89    1.11
  -2   3  -7   55.10    0.67
  -1   3  -7    7.42    0.31
   0   3  -7   67.60    0.57
   1   3  -7  794.96    5.58
   2   3  -7  170.39    1.11
   3   3  -7    1.87    0.45
   4   3  -7   32.67    1.75
  -4   4  -7   -2.54    0.95
  -3   4  -7   -0.11    0.71
  -2   4  -7  156.63    1.67
  -1   4  -7  444.89    2.30
   0   4  -7  795.47    2.76
   1   4  -7  100.36    1.97
   2   4  -7   28.02    0.64
   3   4  -7  191.13    2.28
   4   4  -7   52.23    1.89
  -4   5  -7   16.48    1.59
  -3   5  -7  146.09    2.00
  -2   5  -7   15.51    0.99
  -1   5  -7    2.41    0.57
   0   5  -7  158.03    1.00
   1   5  -7  461.20    8.27
   2   5  -7  258.53    1.44
   3   5  -7    1.84    0.90
   4   5  -7   32.30    1.73
  -3   6  -7    2.75    0.88
  -2   6  -7   24.66    1.12
  -1   6  -7  401.71    2.50
   0   6  -7   62.99    0.80
   1   6  -7   15.37    0.63
   2   6  -7   15.07    1.11
   3   6  -7   76.98    1.85
   4   6  -7   46.35    1.99
  -4   7  -7   11.08    1.43
  -3   7  -7   43.80    1.62
  -2   7  -7    3.57    0.81
  -1   7  -7    0.81    0.67
   0   7  -7   84.51    0.96
   1   7  -7   24.69    0.78
   2   7  -7   98.37    1.76
   3   7  -7    2.00    1.05
   4   7  -7   16.49    1.79
  -3   8  -7    5.14    1.12
  -2   8  -7    0.79    0.89
  -1   8  -7  158.11    1.91
   0   8  -7    2.17    0.50
   1   8  -7   13.93    0.72
   2   8  -7    0.84    0.92
   3   8  -7   20.82    1.60
  -3   9  -7   22.08    1.81
  -2   9  -7   -1.35    0.82
  -1   9  -7   17.67    1.26
   0   9  -7    6.82    0.60
   1   9  -7   12.31    0.72
   2   9  -7   36.00    1.62
   3   9  -7    0.55    1.22
  -3  10  -7    0.01    1.14
  -2  10  -7   -1.35    1.01
  -1  10  -7   54.46    1.65
   0  10  -7    0.47    0.56
   1  10  -7   53.33    1.63
   2  10  -7   31.22    1.70
   3  10  -7    0.67    1.32
  -2  11  -7    9.80    1.21
  -1  11  -7   54.64    1.21
   0  11  -7   63.47    1.20
   1  11  -7    3.26    1.06
   2  11  -7   13.51    1.52
  -2  12  -7   16.13    1.64
  -1  12  -7   13.88    0.94
   0  12  -7   18.25    1.40
   1  12  -7   18.45    1.58
   2  12  -7   20.74    1.88
  -1  13  -7   14.31    1.21
   0  13  -7   72.76    2.06
   1  13  -7    1.41    1.24
   0  14  -7    4.79    1.39
   0 -14  -6   11.79    1.35
   1 -14  -6   17.14    1.31
  -1 -13  -6  135.69    2.30
   0 -13  -6   14.07    1.27
   1 -13  -6    0.63    0.71
  -2 -12  -6    4.77    0.87
  -1 -12  -6    5.53    0.80
   0 -12  -6   47.98    1.41
   1 -12  -6   57.61    1.46
   2 -12  -6  173.81    2.82
  -3 -11  -6   40.89    1.17
  -2 -11  -6   11.50    1.20
  -1 -11  -6  351.25    2.98
   0 -11  -6   76.86    1.50
   1 -11  -6    1.96    0.58
   2 -11  -6   35.60    1.73
  -3 -10  -6   86.08    1.37
  -2 -10  -6   14.67    0.77
  -1 -10  -6    9.37    0.96
   0 -10  -6   56.18    1.26
   1 -10  -6   54.01    0.96
   2 -10  -6  314.21    3.17
   3 -10  -6    0.77    1.24
  -3  -9  -6   29.07    0.97
  -2  -9  -6   18.47    0.75
  -1  -9  -6  240.47    1.48
   0  -9  -6   79.85    1.29
   1  -9  -6   17.51    0.68
   2  -9  -6   31.74    1.43
   3  -9  -6   10.93    1.36
  -3  -8  -6   68.33    1.66
  -2  -8  -6    0.80    0.38
  -1  -8  -6    7.81    0.49
   0  -8  -6   12.26    0.50
   1  -8  -6   22.73    0.65
   2  -8  -6  153.63    2.08
   3  -8  -6   18.30    1.43
  -4  -7  -6    4.39    1.08
  -3  -7  -6   22.61    1.26
  -2  -7  -6   26.44    0.70
  -1  -7  -6  189.96    1.22
   0  -7  -6   13.55    0.46
   1  -7  -6   41.46    0.68
   2  -7  -6   17.44    1.04
   3  -7  -6    6.71    1.08
   4  -7  -6   25.25    1.79
  -4  -6  -6    1.78    1.00
  -3  -6  -6   58.44    1.52
  -2  -6  -6   27.01    0.67
  -1  -6  -6    6.76    0.41
   0  -6  -6  295.49    1.25
   1  -6  -6  106.74    0.84
   2  -6  -6   35.40    1.10
   3  -6  -6   50.80    1.53
   4  -6  -6    2.19    1.20
  -4  -5  -6   46.41    1.80
  -3  -5  -6   38.20    1.32
  -2  -5  -6  114.16    1.01
  -1  -5  -6  258.83    1.99
   0  -5  -6   13.30    0.37
   1  -5  -6  266.11    1.24
   2  -5  -6   28.73    0.97
   3  -5  -6  113.83    1.87
   4  -5  -6   54.65    1.91
  -4  -4  -6    3.68    0.99
  -3  -4  -6   57.23    1.43
  -2  -4  -6  516.19    2.74
  -1  -4  -6  116.16    1.33
   0  -4  -6  883.75    2.55
   1  -4  -6   28.04    0.34
   2  -4  -6   13.16    0.79
   3  -4  -6  218.52    2.33
   4  -4  -6   10.11    1.38
  -4  -3  -6  136.84    2.31
  -3  -3  -6    7.12    0.82
  -2  -3  -6  211.09    1.75
  -1  -3  -6   52.89    0.55
   0  -3  -6  195.89    0.82
   1  -3  -6 1669.68    5.81
   2  -3  -6  109.66    0.94
   3  -3  -6  117.75    1.78
   4  -3  -6   25.35    1.59
  -4  -2  -6    2.20    0.89
  -3  -2  -6    6.32    0.72
  -2  -2  -6  819.91    3.18
  -1  -2  -6  223.18    1.38
   0  -2  -6  536.36    1.17
   1  -2  -6   20.50    0.37
   2  -2  -6    2.55    0.33
   3  -2  -6  255.56    2.35
   4  -2  -6   21.89    1.48
  -4  -1  -6  146.73    2.23
  -3  -1  -6    0.57    0.60
  -2  -1  -6   79.36    1.10
  -1  -1  -6   30.63    0.59
   0  -1  -6   89.39    0.55
   1  -1  -6  769.61    3.89
   2  -1  -6  139.93    0.96
   3  -1  -6   75.35    1.00
   4  -1  -6    5.26    1.12
  -4   0  -6    2.59    0.87
  -3   0  -6    6.90    0.49
  -2   0  -6  302.92    1.22
  -1   0  -6  229.90    1.32
   0   0  -6  572.19    1.55
   1   0  -6    3.86    0.24
   2   0  -6   44.17    0.61
   3   0  -6  117.56    1.31
   4   0  -6   13.49    1.47
  -4   1  -6  142.95    2.08
  -3   1  -6   -0.43    0.40
  -2   1  -6   81.42    0.73
  -1   1  -6   33.64    0.90
   0   1  -6   90.79    1.02
   1   1  -6  764.89    3.18
   2   1  -6  134.32    1.61
   3   1  -6   71.61    0.96
   4   1  -6    4.73    1.13
  -4   2  -6    2.38    0.80
  -3   2  -6    5.99    0.60
  -2   2  -6  817.17    2.93
  -1   2  -6  231.31    5.05
   0   2  -6  543.32    2.07
   1   2  -6   20.29    0.40
   2   2  -6    2.44    0.32
   3   2  -6  258.33    2.67
   4   2  -6   19.54    1.58
  -4   3  -6  118.95    2.06
  -3   3  -6    6.17    0.56
  -2   3  -6  206.90    1.05
  -1   3  -6   52.14    0.52
   0   3  -6  201.13    0.88
   1   3  -6 1662.17    8.59
   2   3  -6  110.36    0.89
   3   3  -6  119.93    1.18
   4   3  -6   27.56    1.75
  -4   4  -6   -1.16    0.93
  -3   4  -6   52.89    1.38
  -2   4  -6  490.14    3.88
  -1   4  -6  123.65    1.31
   0   4  -6  904.19    2.09
   1   4  -6   29.27    0.66
   2   4  -6   14.84    0.55
   3   4  -6  220.17    2.40
   4   4  -6    8.42    1.28
  -4   5  -6   34.01    1.65
  -3   5  -6   34.95    1.33
  -2   5  -6  124.18    1.60
  -1   5  -6  283.54    1.98
   0   5  -6   13.75    0.48
   1   5  -6  268.12    2.41
   2   5  -6   30.79    1.18
   3   5  -6  122.49    2.10
   4   5  -6   58.73    2.05
  -3   6  -6   52.62    1.52
  -2   6  -6   30.12    1.13
  -1   6  -6    9.26    0.93
   0   6  -6  302.89    1.43
   1   6  -6  103.56    2.13
   2   6  -6   35.62    1.29
   3   6  -6   53.78    1.69
   4   6  -6    3.60    1.27
  -4   7  -6   -2.30    1.08
  -3   7  -6   16.79    1.34
  -2   7  -6   26.32    1.19
  -1   7  -6  213.45    2.07
   0   7  -6   14.48    0.65
   1   7  -6   39.26    0.80
   2   7  -6   18.94    1.22
   3   7  -6    5.91    1.18
   4   7  -6   31.37    1.91
  -3   8  -6   60.23    1.85
  -2   8  -6   -0.39    0.74
  -1   8  -6    9.72    1.12
   0   8  -6   13.33    0.71
   1   8  -6   21.73    0.73
   2   8  -6  157.28    2.29
   3   8  -6   19.09    1.60
  -3   9  -6   22.08    1.62
  -2   9  -6   15.93    1.47
  -1   9  -6  245.36    2.34
   0   9  -6   81.21    1.09
   1   9  -6   18.58    0.76
   2   9  -6   30.72    1.56
   3   9  -6    9.18    1.38
  -3  10  -6   82.19    2.52
  -2  10  -6   10.55    1.11
  -1  10  -6    7.60    0.96
   0  10  -6   57.00    1.06
   1  10  -6   54.35    1.66
   2  10  -6  319.47    3.42
   3  10  -6    0.12    1.27
  -2  11  -6    7.77    1.27
  -1  11  -6  343.91    5.98
   0  11  -6   73.90    1.28
   1  11  -6    0.02    1.03
   2  11  -6   32.09    1.85
  -2  12  -6    1.56    1.16
  -1  12  -6    7.68    1.01
   0  12  -6   49.55    1.70
   1  12  -6   51.58    1.84
   2  12  -6  177.28    3.02
  -1  13  -6  136.84    1.78
   0  13  -6   13.57    1.56
   1  13  -6   -0.60    1.24
   0  14  -6   11.22    1.47
   0 -14  -5    3.65    0.84
   1 -14  -5   60.03    1.69
  -1 -13  -5   43.31    1.65
   0 -13  -5    3.28    0.78
   1 -13  -5    3.90    0.78
  -2 -12  -5    0.69    0.75
  -1 -12  -5   12.14    1.21
   1 -12  -5   82.08    1.62
   2 -12  -5    6.31    1.36
  -3 -11  -5   34.58    1.11
  -2 -11  -5   27.97    1.37
  -1 -11  -5    0.98    0.62
   0 -11  -5   38.59    1.23
   1 -11  -5    0.26    0.56
   2 -11  -5   25.71    1.63
  -3 -10  -5   16.35    0.91
  -2 -10  -5   26.61    0.84
  -1 -10  -5   24.46    1.08
   0 -10  -5    3.41    0.58
   1 -10  -5    0.26    0.45
   2 -10  -5   69.62    1.87
   3 -10  -5    0.28    1.20
  -3  -9  -5    4.89    0.59
  -2  -9  -5    1.74    0.41
  -1  -9  -5   35.22    0.69
   0  -9  -5  107.12    1.47
   1  -9  -5    1.04    0.40
   2  -9  -5   50.66    1.60
   3  -9  -5    8.22    1.24
  -3  -8  -5   31.25    0.95
  -2  -8  -5   49.03    0.86
  -1  -8  -5   33.04    0.66
   0  -8  -5    6.01    0.40
   1  -8  -5   70.05    0.88
   2  -8  -5   70.93    1.59
   3  -8  -5    0.52    0.98
  -4  -7  -5    6.28    1.16
  -3  -7  -5   13.42    1.21
  -2  -7  -5   85.69    0.98
  -1  -7  -5    6.33    0.41
   0  -7  -5  238.45    1.17
   1  -7  -5   10.52    0.51
   2  -7  -5   74.81    1.47
   3  -7  -5   32.24    1.48
   4  -7  -5   10.07    1.49
  -4  -6  -5   12.78    1.52
  -3  -6  -5   71.72    1.62
  -2  -6  -5   88.95    0.95
  -1  -6  -5   58.28    0.67
   0  -6  -5  185.30    0.97
   1  -6  -5  149.74    0.96
   2  -6  -5   45.26    1.17
   3  -6  -5   22.65    1.30
   4  -6  -5   18.26    1.66
  -4  -5  -5   19.84    1.59
  -3  -5  -5   58.66    1.46
  -2  -5  -5  183.29    1.21
  -1  -5  -5   57.91    0.61
   0  -5  -5  491.77    1.42
   1  -5  -5    3.31    0.27
   2  -5  -5  156.75    1.70
   3  -5  -5   50.89    1.45
   4  -5  -5   34.47    1.78
  -4  -4  -5   30.79    1.64
  -3  -4  -5  146.32    1.90
  -2  -4  -5   78.07    0.82
  -1  -4  -5   69.06    0.62
   0  -4  -5  212.65    0.68
   1  -4  -5  293.80    0.87
   2  -4  -5  124.60    1.49
   3  -4  -5   43.76    1.34
   4  -4  -5   33.51    1.77
  -3  -3  -5   45.66    1.26
  -2  -3  -5  101.25    1.26
  -1  -3  -5  179.46    1.78
   0  -3  -5  370.66    1.70
   1  -3  -5  103.93    0.74
   2  -3  -5   51.56    0.70
   3  -3  -5   30.12    1.20
   4  -3  -5   71.67    1.98
  -4  -2  -5   12.46    1.32
  -3  -2  -5  133.25    1.74
  -2  -2  -5   73.18    1.10
  -1  -2  -5   13.62    0.47
   0  -2  -5  109.24    0.47
   1  -2  -5   58.00    0.50
   2  -2  -5   82.96    0.79
   3  -2  -5    2.10    0.72
   4  -2  -5   41.81    1.65
  -4  -1  -5    3.59    0.88
  -3  -1  -5    6.86    0.76
  -2  -1  -5   10.19    0.64
  -1  -1  -5    6.99    0.41
   0  -1  -5   18.89    0.30
   1  -1  -5  384.55    1.09
   2  -1  -5    0.76    0.28
   3  -1  -5   10.65    1.00
   4  -1  -5   19.07    1.52
  -4   0  -5    1.44    0.83
  -3   0  -5   -0.62    0.39
  -2   0  -5    0.21    0.26
  -1   0  -5    0.38    0.18
   0   0  -5   -0.17    0.19
   1   0  -5    0.16    0.17
   2   0  -5    0.08    0.25
   3   0  -5    1.15    0.41
   4   0  -5    4.63    1.14
  -4   1  -5    3.61    0.84
  -3   1  -5    6.65    0.50
  -2   1  -5   10.10    0.44
  -1   1  -5    7.67    0.42
   0   1  -5   20.17    0.53
   1   1  -5  391.20    1.12
   2   1  -5    0.50    0.27
   3   1  -5   10.38    0.63
   4   1  -5   17.37    1.49
  -4   2  -5   10.90    1.21
  -3   2  -5  132.23    1.13
  -2   2  -5   72.13    0.69
  -1   2  -5   14.59    0.42
   0   2  -5  112.69    0.58
   1   2  -5   57.45    1.21
   2   2  -5   80.90    0.74
   3   2  -5    1.49    0.65
   4   2  -5   40.30    1.74
  -4   3  -5    3.51    0.93
  -3   3  -5   45.65    0.82
  -2   3  -5  103.97    0.79
  -1   3  -5  187.29    1.35
   0   3  -5  375.98    1.13
   1   3  -5  107.82    1.38
   2   3  -5   51.39    0.64
   3   3  -5   33.55    0.75
   4   3  -5   75.20    2.12
  -4   4  -5   18.49    1.45
  -3   4  -5  140.19    1.86
  -2   4  -5   79.46    1.40
  -1   4  -5   73.33    1.01
   0   4  -5  218.83    2.17
   1   4  -5  290.68    6.37
   2   4  -5  122.03    1.57
   3   4  -5   49.73    1.45
   4   4  -5   37.45    1.81
  -4   5  -5   10.88    1.19
  -3   5  -5   54.71    1.46
  -2   5  -5  195.48    1.87
  -1   5  -5   63.22    1.03
   0   5  -5  511.27    2.69
   1   5  -5    4.19    0.37
   2   5  -5  163.21    1.93
   3   5  -5   58.33    1.64
   4   5  -5   41.59    1.95
  -4   6  -5    6.55    1.19
  -3   6  -5   64.38    1.59
  -2   6  -5   99.02    1.55
  -1   6  -5   66.47    1.19
   0   6  -5  190.91    1.15
   1   6  -5  152.88    1.73
   2   6  -5   45.87    1.35
   3   6  -5   24.66    1.42
   4   6  -5   23.23    1.81
  -4   7  -5    0.86    1.12
  -3   7  -5   11.22    1.05
  -2   7  -5   86.58    1.52
  -1   7  -5    8.10    0.81
   0   7  -5  242.63    1.96
   1   7  -5   11.37    0.99
   2   7  -5   76.07    1.67
   3   7  -5   32.26    1.61
   4   7  -5   12.32    1.57
  -3   8  -5   25.75    1.48
  -2   8  -5   48.70    1.42
  -1   8  -5   33.40    1.18
   0   8  -5    7.27    0.57
   1   8  -5   69.29    1.58
   2   8  -5   73.93    1.77
   3   8  -5    0.52    1.09
  -3   9  -5    1.08    1.02
  -2   9  -5    0.13    0.84
  -1   9  -5   36.71    1.35
   0   9  -5  106.16    1.18
   1   9  -5    2.51    0.91
   2   9  -5   51.58    1.75
   3   9  -5    7.79    1.38
  -3  10  -5   10.40    1.32
  -2  10  -5   23.58    1.56
  -1  10  -5   24.39    1.32
   0  10  -5    3.31    0.58
   1  10  -5    1.08    0.99
   2  10  -5   79.62    2.09
   3  10  -5   -0.17    1.27
  -2  11  -5   23.75    1.63
  -1  11  -5   -0.38    0.85
   0  11  -5   36.95    1.01
   1  11  -5   -0.19    1.02
   2  11  -5   22.05    1.76
  -2  12  -5   -3.11    1.14
  -1  12  -5   14.54    1.14
   0  12  -5    4.90    1.08
   1  12  -5   77.55    2.11
   2  12  -5    9.23    1.50
  -1  13  -5   45.98    1.77
   0  13  -5    2.90    1.14
   1  13  -5    3.16    1.29
   0  14  -5    2.66    1.35
   0 -14  -4  104.70    2.13
   1 -14  -4    6.14    0.88
  -1 -13  -4   15.72    1.37
   0 -13  -4   -0.18    0.70
   1 -13  -4    3.65    0.81
  -2 -12  -4    2.70    0.80
  -1 -12  -4   34.53    1.46
   0 -12  -4  264.79    2.62
   1 -12  -4    1.88    0.68
   2 -12  -4   17.02    1.64
  -3 -11  -4  105.28    1.46
  -2 -11  -4  123.79    2.05
  -1 -11  -4    0.91    0.60
   0 -11  -4    6.38    0.73
   1 -11  -4    2.34    0.65
   2 -11  -4  126.31    2.37
  -3 -10  -4   12.51    0.90
  -2 -10  -4   20.94    0.79
  -1 -10  -4   16.62    1.01
   0 -10  -4  360.01    2.61
   1 -10  -4   50.10    0.95
   2 -10  -4   53.67    1.74
   3 -10  -4    3.98    1.32
  -3  -9  -4   53.39    1.12
  -2  -9  -4  144.36    1.30
  -1  -9  -4    9.64    0.54
   0  -9  -4    6.64    0.77
   1  -9  -4    4.71    0.47
   2  -9  -4  145.16    2.19
   3  -9  -4   89.85    2.10
  -3  -8  -4   17.37    0.87
  -2  -8  -4   52.31    0.87
  -1  -8  -4    2.53    0.32
   0  -8  -4  372.23    1.65
   1  -8  -4   15.50    0.61
   2  -8  -4   51.98    1.46
   3  -8  -4    8.05    1.16
  -4  -7  -4   31.48    1.72
  -3  -7  -4   31.90    0.91
  -2  -7  -4   64.45    0.87
  -1  -7  -4    5.81    0.44
   0  -7  -4    5.77    0.37
   1  -7  -4  149.58    1.06
   2  -7  -4  192.49    2.09
   3  -7  -4   48.50    1.60
   4  -7  -4   25.84    1.77
  -4  -6  -4    1.48    1.02
  -3  -6  -4   37.39    1.32
  -2  -6  -4  307.02    1.57
  -1  -6  -4   17.39    0.47
   0  -6  -4  379.20    1.30
   1  -6  -4    8.92    0.42
   2  -6  -4    1.17    0.30
   3  -6  -4   28.14    1.31
   4  -6  -4    3.85    1.30
  -4  -5  -4   62.69    1.88
  -3  -5  -4    4.87    0.76
  -2  -5  -4   20.23    0.57
  -1  -5  -4   64.34    0.63
   0  -5  -4   13.21    0.33
   1  -5  -4  873.63    4.61
   2  -5  -4  149.38    0.88
   3  -5  -4    9.41    1.13
   4  -5  -4   42.28    1.84
  -4  -4  -4   32.98    1.58
  -3  -4  -4  103.19    1.68
  -2  -4  -4  253.13    1.30
  -1  -4  -4  258.62    1.07
   0  -4  -4  236.18    0.76
   1  -4  -4  222.10    0.89
   2  -4  -4   59.82    0.94
   3  -4  -4   79.49    1.59
   4  -4  -4   28.38    1.74
  -4  -3  -4   78.28    1.87
  -3  -3  -4    6.56    0.79
  -2  -3  -4   18.89    0.79
  -1  -3  -4 1590.70    4.81
   0  -3  -4    1.37    0.21
   1  -3  -4  574.99    3.12
   2  -3  -4    3.98    0.59
   3  -3  -4   -0.79    0.70
   4  -3  -4  111.54    2.27
  -4  -2  -4   68.87    1.78
  -3  -2  -4  145.85    1.78
  -2  -2  -4   58.03    0.98
  -1  -2  -4  343.42    1.14
   0  -2  -4    1.59    0.18
   1  -2  -4  483.39    2.13
   2  -2  -4  476.16    1.90
   3  -2  -4  231.21    2.27
   4  -2  -4   56.98    1.78
  -4  -1  -4   97.77    1.95
  -3  -1  -4    7.83    0.79
  -2  -1  -4    4.08    0.48
  -1  -1  -4 1877.40   21.53
   0  -1  -4    2.25    0.22
   1  -1  -4  756.64    3.13
   2  -1  -4   58.27    0.66
   3  -1  -4   35.58    1.22
   4  -1  -4  102.35    2.13
  -4   0  -4   54.74    1.63
  -3   0  -4  145.84    1.13
  -2   0  -4   98.60    0.73
  -1   0  -4  175.20    2.59
   0   0  -4  167.61    1.12
   1   0  -4  250.91    1.21
   2   0  -4  495.19    1.60
   3   0  -4  349.63    2.59
   4   0  -4   79.95    2.07
  -4   1  -4   99.72    1.89
  -3   1  -4    7.28    0.51
  -2   1  -4    4.33    0.32
  -1   1  -4 1895.22   16.59
   0   1  -4    1.91    0.19
   1   1  -4  760.06    2.52
   2   1  -4   58.42    0.63
   3   1  -4   34.99    1.22
   4   1  -4   98.62    2.13
  -4   2  -4   67.41    1.64
  -3   2  -4  149.10    1.18
  -2   2  -4   59.78    0.95
  -1   2  -4  342.30    1.49
   0   2  -4    1.55    0.22
   1   2  -4  501.61    7.30
   2   2  -4  471.77    1.54
   3   2  -4  232.19    3.96
   4   2  -4   53.04    1.81
  -4   3  -4   69.67    1.71
  -3   3  -4    8.40    0.58
  -2   3  -4   21.21    0.67
  -1   3  -4 1623.32    5.75
   0   3  -4    0.99    0.24
   1   3  -4  587.83    6.32
   2   3  -4    3.38    0.62
   3   3  -4    1.41    0.76
   4   3  -4  119.69    2.42
  -4   4  -4   24.21    1.47
  -3   4  -4  101.47    1.60
  -2   4  -4  254.78    2.00
  -1   4  -4  277.95    1.65
   0   4  -4  250.79    3.39
   1   4  -4  232.96    1.71
   2   4  -4   67.23    1.30
   3   4  -4   81.97    1.70
   4   4  -4   32.25    1.78
  -4   5  -4   50.89    1.74
  -3   5  -4    3.92    0.79
  -2   5  -4   26.30    0.99
  -1   5  -4   69.99    1.00
   0   5  -4   14.83    0.47
   1   5  -4  906.68    3.53
   2   5  -4  159.90    1.91
   3   5  -4   12.86    1.26
   4   5  -4   50.25    2.06
  -4   6  -4   -2.30    0.97
  -3   6  -4   36.31    1.40
  -2   6  -4  328.58    2.39
  -1   6  -4   19.01    0.81
   0   6  -4  396.47    2.04
   1   6  -4   11.28    0.89
   2   6  -4    0.92    0.78
   3   6  -4   29.86    1.47
   4   6  -4    4.93    1.35
  -4   7  -4   19.72    1.65
  -3   7  -4   26.67    1.37
  -2   7  -4   71.10    1.45
  -1   7  -4    7.19    0.87
   0   7  -4    7.57    0.55
   1   7  -4  156.71    1.94
   2   7  -4  196.73    2.33
   3   7  -4   50.31    1.79
   4   7  -4   31.58    1.93
  -3   8  -4   13.42    1.37
  -2   8  -4   59.49    1.47
  -1   8  -4    2.96    0.67
   0   8  -4  382.17    2.19
   1   8  -4   19.40    1.18
   2   8  -4   53.26    1.63
   3   8  -4    6.88    1.30
  -3   9  -4   43.51    1.73
  -2   9  -4  144.65    2.04
  -1   9  -4   10.90    0.97
   0   9  -4    7.81    0.63
   1   9  -4    6.88    1.04
   2   9  -4  147.98    2.39
   3   9  -4   93.88    2.33
  -3  10  -4    7.55    1.28
  -2  10  -4   15.00    1.36
  -1  10  -4   14.45    1.21
   0  10  -4  348.78    1.97
   1  10  -4   48.06    1.67
   2  10  -4   56.56    1.89
   3  10  -4    1.78    1.32
  -2  11  -4  124.37    2.39
  -1  11  -4   -1.88    0.82
   0  11  -4    6.96    0.69
   1  11  -4    2.78    1.13
   2  11  -4  131.57    2.62
  -2  12  -4   -1.60    1.12
  -1  12  -4   34.28    1.60
   0  12  -4  263.05    3.04
   1  12  -4    2.13    1.15
   2  12  -4   19.26    1.87
  -2  13  -4   32.43    1.97
  -1  13  -4   19.60    1.25
   0  13  -4    0.54    1.06
   1  13  -4    4.26    1.35
   0  14  -4   98.34    2.40
   0 -14  -3   44.85    1.66
   1 -14  -3   18.48    1.32
  -2 -13  -3    0.67    0.83
  -1 -13  -3    0.70    0.76
   0 -13  -3    6.66    0.89
   1 -13  -3   23.05    1.34
  -2 -12  -3    6.48    0.88
  -1 -12  -3   28.30    1.40
   0 -12  -3   27.31    1.30
   1 -12  -3   22.93    1.24
   2 -12  -3    0.06    1.20
  -3 -11  -3   21.86    0.97
  -2 -11  -3   15.67    1.24
  -1 -11  -3    2.52    0.66
   0 -11  -3   22.95    1.12
   1 -11  -3   21.49    1.13
   2 -11  -3    0.58    1.11
   3 -11  -3   21.76    1.83
  -3 -10  -3   13.28    0.93
  -2 -10  -3    7.60    0.76
  -1 -10  -3   10.16    0.94
   0 -10  -3   52.11    1.26
   1 -10  -3   46.05    0.95
   2 -10  -3    1.01    1.02
   3 -10  -3   14.66    1.69
  -3  -9  -3    2.77    0.56
  -2  -9  -3   43.34    0.88
  -1  -9  -3   17.12    0.57
   0  -9  -3  104.13    1.41
   1  -9  -3    3.09    0.45
   2  -9  -3   31.72    1.47
   3  -9  -3   80.35    2.04
  -3  -8  -3   16.58    0.85
  -2  -8  -3   69.99    0.95
  -1  -8  -3   15.14    0.54
   0  -8  -3   96.72    1.27
   1  -8  -3   46.64    0.78
   2  -8  -3   48.05    0.80
   3  -8  -3   53.41    1.73
  -4  -7  -3   44.39    1.87
  -3  -7  -3   11.04    0.75
  -2  -7  -3   55.25    0.81
  -1  -7  -3    0.58    0.27
   0  -7  -3  283.66    2.18
   1  -7  -3  236.83    1.28
   2  -7  -3   11.66    0.54
   3  -7  -3   48.89    1.60
   4  -7  -3   15.97    1.73
  -4  -6  -3   21.06    1.58
  -3  -6  -3    2.34    0.78
  -2  -6  -3  342.25    1.62
  -1  -6  -3  191.94    1.07
   0  -6  -3   20.57    0.39
   1  -6  -3   28.30    0.64
   2  -6  -3   84.04    1.05
   3  -6  -3  121.34    1.96
   4  -6  -3   21.58    1.71
  -4  -5  -3   56.19    1.81
  -3  -5  -3   30.83    1.22
  -2  -5  -3  106.75    0.94
  -1  -5  -3   23.93    0.44
   0  -5  -3  488.21    1.29
   1  -5  -3  433.98    1.38
   2  -5  -3   22.51    0.49
   3  -5  -3    7.11    0.97
   4  -5  -3   12.49    1.46
  -4  -4  -3   11.22    1.38
  -3  -4  -3    1.24    0.64
  -2  -4  -3  263.16    1.29
  -1  -4  -3  320.96    1.17
   0  -4  -3  117.61    0.56
   1  -4  -3    1.67    0.19
   2  -4  -3   74.82    1.19
   3  -4  -3  121.69    1.84
   4  -4  -3    3.11    1.27
  -4  -3  -3   28.76    1.52
  -3  -3  -3   27.72    1.16
  -2  -3  -3  292.78    1.97
  -1  -3  -3  315.44    1.07
   0  -3  -3  334.42    2.26
   1  -3  -3  140.06    1.49
   2  -3  -3   29.69    0.85
   3  -3  -3    2.82    0.80
   4  -3  -3   38.25    1.80
  -4  -2  -3    2.86    0.93
  -3  -2  -3   24.18    1.12
  -2  -2  -3   95.94    1.19
  -1  -2  -3   78.28    0.54
   0  -2  -3  151.54    0.47
   1  -2  -3  110.00    1.38
   2  -2  -3  369.87    2.14
   3  -2  -3   25.42    1.16
   4  -2  -3    4.67    1.09
  -2  -1  -3  107.92    1.19
  -1  -1  -3  884.04    3.74
   0  -1  -3   41.01    0.35
   1  -1  -3   54.14    0.44
   2  -1  -3    0.77    0.27
   3  -1  -3    2.88    0.75
   4  -1  -3   34.07    1.61
  -4   0  -3    0.29    0.81
  -2   0  -3   -0.31    0.24
  -1   0  -3    0.77    0.17
   0   0  -3    0.45    0.10
   1   0  -3    0.26    0.16
   4   0  -3    5.83    1.20
  -2   1  -3  110.48    1.56
  -1   1  -3  885.45    6.07
   0   1  -3   39.35    0.28
   1   1  -3   53.15    0.43
   2   1  -3    0.79    0.24
   3   1  -3    2.71    0.75
   4   1  -3   34.78    1.65
  -4   2  -3    1.86    0.65
  -2   2  -3   96.15    0.79
  -1   2  -3   78.29    0.55
   0   2  -3  162.42    0.99
   1   2  -3  113.74    1.62
   2   2  -3  367.57    1.33
   3   2  -3   24.86    1.06
   4   2  -3    4.81    1.10
  -4   3  -3   19.79    1.34
  -3   3  -3   30.51    1.01
  -2   3  -3  284.49    2.28
  -1   3  -3  323.38    1.58
   0   3  -3  345.69    1.46
   1   3  -3  159.00    1.32
   2   3  -3   31.43    0.97
   3   3  -3    4.30    0.85
   4   3  -3   39.85    1.82
  -4   4  -3    7.45    1.02
  -3   4  -3    2.45    0.64
  -2   4  -3  268.23    1.54
  -1   4  -3  344.84    1.78
   0   4  -3  128.32    1.03
   1   4  -3    2.45    0.48
   2   4  -3   84.22    1.41
   3   4  -3  123.98    1.96
   4   4  -3    5.52    1.25
  -4   5  -3   50.13    1.72
  -3   5  -3   31.60    1.25
  -2   5  -3  116.93    1.47
   0   5  -3  513.00    5.71
   1   5  -3  457.43    2.55
   2   5  -3   30.09    1.16
   3   5  -3    7.12    1.03
   4   5  -3   15.16    1.75
  -4   6  -3   13.20    1.51
  -3   6  -3    2.75    0.78
  -2   6  -3  360.21    2.45
  -1   6  -3  214.07    1.68
   0   6  -3   21.80    0.53
   1   6  -3   33.16    1.07
   2   6  -3   88.36    1.65
   3   6  -3  129.94    2.20
   4   6  -3   25.78    1.86
  -4   7  -3   30.91    1.76
  -3   7  -3    7.25    0.96
  -2   7  -3   71.19    1.42
  -1   7  -3    0.84    0.53
   0   7  -3  291.42    1.43
   1   7  -3  254.01    2.37
   2   7  -3   17.96    1.23
   3   7  -3   48.30    1.75
   4   7  -3   19.25    1.81
  -3   8  -3   19.21    1.38
  -2   8  -3   79.79    1.54
  -1   8  -3   15.73    0.98
   0   8  -3   98.52    1.03
   1   8  -3   50.08    1.46
   2   8  -3   51.09    1.62
   3   8  -3   52.49    1.89
  -3   9  -3    0.06    1.00
  -2   9  -3   45.70    1.42
  -1   9  -3   16.59    1.09
   0   9  -3  106.26    1.15
   1   9  -3    3.51    0.96
   2   9  -3   33.95    1.60
   3   9  -3   81.66    2.26
  -3  10  -3    7.05    1.21
  -2  10  -3    5.10    0.93
  -1  10  -3    6.02    0.97
   0  10  -3   66.88    1.60
   1  10  -3   47.62    1.65
   2  10  -3    2.29    1.14
   3  10  -3   13.51    1.59
  -2  11  -3   13.48    1.21
  -1  11  -3    0.56    0.86
   0  11  -3   19.47    1.30
   1  11  -3   19.46    1.50
   2  11  -3    3.45    1.27
   3  11  -3   18.65    1.94
  -2  12  -3    6.72    1.28
  -1  12  -3   31.28    1.74
   1  12  -3   21.28    1.64
   2  12  -3   -1.51    1.32
  -1  13  -3    0.70    1.10
   0  13  -3    8.65    1.32
   1  13  -3   22.53    1.79
   0  14  -3   60.11    2.12
   0 -14  -2   35.66    1.59
   1 -14  -2    1.00    0.82
  -2 -13  -2    4.30    0.85
  -1 -13  -2    4.09    0.86
   0 -13  -2   37.50    1.49
   1 -13  -2  111.31    2.01
  -2 -12  -2  104.62    2.06
  -1 -12  -2   32.94    1.41
   0 -12  -2   41.92    1.45
   1 -12  -2    6.54    0.83
   2 -12  -2    9.11    1.42
  -3 -11  -2    0.87    0.77
  -2 -11  -2   30.99    1.40
  -1 -11  -2    4.72    0.71
   0 -11  -2  107.66    1.70
   1 -11  -2   96.37    1.64
   2 -11  -2    0.38    1.13
   3 -11  -2   40.82    1.93
  -3 -10  -2    2.31    0.56
  -2 -10  -2  106.29    1.20
  -1 -10  -2  135.26    1.81
   0 -10  -2  122.81    1.64
   1 -10  -2   19.86    0.80
   2 -10  -2    3.25    1.09
   3 -10  -2   76.57    2.17
  -3  -9  -2    2.07    0.55
  -2  -9  -2   90.00    1.07
   0  -9  -2  128.84    1.56
   1  -9  -2  238.62    1.53
   2  -9  -2    2.12    0.45
   3  -9  -2  106.14    2.23
  -3  -8  -2    4.44    0.85
  -2  -8  -2  232.65    1.48
  -1  -8  -2  154.14    1.07
   0  -8  -2  423.96    2.43
   1  -8  -2    1.37    0.38
   2  -8  -2    0.32    0.35
   3  -8  -2  117.12    2.15
  -4  -7  -2  103.64    2.27
  -3  -7  -2    3.62    0.48
  -2  -7  -2   82.85    0.95
  -1  -7  -2  134.69    0.95
   0  -7  -2   69.70    1.04
   1  -7  -2  360.59    1.54
   2  -7  -2   33.32    0.65
   3  -7  -2   55.26    1.66
   4  -7  -2   24.64    1.80
  -4  -6  -2   19.31    1.52
  -3  -6  -2   36.24    0.84
  -2  -6  -2  207.93    1.27
  -1  -6  -2   27.77    0.50
   0  -6  -2  164.58    1.32
   1  -6  -2   72.88    0.80
   2  -6  -2  103.95    0.87
   3  -6  -2  111.43    1.89
   4  -6  -2    5.02    1.32
  -4  -5  -2   43.29    1.70
  -3  -5  -2    9.22    1.08
  -2  -5  -2   40.12    0.66
  -1  -5  -2  415.38    2.83
   0  -5  -2   16.07    0.31
   1  -5  -2  226.60    1.03
   2  -5  -2   62.27    0.65
   3  -5  -2    1.08    0.81
   4  -5  -2   38.79    1.85
  -4  -4  -2   10.87    1.13
  -3  -4  -2  119.11    1.72
  -2  -4  -2   19.41    0.53
  -1  -4  -2    0.11    0.17
   0  -4  -2  167.48    1.14
   1  -4  -2  101.20    0.64
   2  -4  -2  207.87    1.73
   3  -4  -2   23.79    1.19
   4  -4  -2    1.48    1.21
  -4  -3  -2   14.23    1.40
  -3  -3  -2  121.24    1.72
  -2  -3  -2   32.84    0.56
  -1  -3  -2  268.07    0.95
   0  -3  -2  337.86    1.80
   1  -3  -2  119.36    1.25
   2  -3  -2  230.29    1.77
   3  -3  -2   -0.10    0.71
   4  -3  -2   76.66    2.11
  -4  -2  -2    1.30    0.96
  -3  -2  -2  377.45    2.62
  -2  -2  -2   13.88    0.76
  -1  -2  -2    6.88    0.27
   0  -2  -2  874.94    2.17
   1  -2  -2  127.71    1.70
   2  -2  -2  677.93    2.85
   3  -2  -2    1.98    0.75
   4  -2  -2    3.31    1.10
  -4  -1  -2    2.63    0.89
  -3  -1  -2  202.14    1.96
  -2  -1  -2  103.68    1.18
  -1  -1  -2 2928.28    9.06
   0  -1  -2  301.17    2.18
   1  -1  -2    8.04    0.25
   2  -1  -2  308.01    1.91
   3  -1  -2    6.29    0.87
   4  -1  -2  217.57    2.75
  -4   0  -2    6.71    1.02
  -3   0  -2  661.27    2.13
  -2   0  -2   21.50    0.66
  -1   0  -2   10.44    0.26
   0   0  -2  605.65    1.52
   1   0  -2  306.05    2.43
   2   0  -2 1972.13    4.97
   3   0  -2   11.32    0.92
   4   0  -2   16.88    1.61
  -4   1  -2    3.53    0.85
  -3   1  -2  198.16    2.90
  -2   1  -2  112.58    1.35
  -1   1  -2 2908.19   21.84
   0   1  -2  308.88    0.94
   1   1  -2    7.81    0.24
   2   1  -2  308.51    1.40
   3   1  -2    2.08    0.76
   4   1  -2  220.09    2.81
  -4   2  -2    0.29    0.56
  -3   2  -2  371.40    3.06
  -2   2  -2   18.15    0.48
  -1   2  -2    7.69    0.25
   0   2  -2  918.37    3.36
   1   2  -2  139.07    1.09
   2   2  -2  695.62    3.01
   3   2  -2    2.27    0.73
   4   2  -2    3.46    1.09
  -4   3  -2   10.01    1.05
  -3   3  -2  121.85    1.06
  -1   3  -2  278.59    1.44
   0   3  -2  395.25    1.46
   1   3  -2  136.86    1.25
   2   3  -2  231.29    1.91
   3   3  -2    1.13    0.77
   4   3  -2   80.79    2.18
  -4   4  -2    7.42    1.05
  -3   4  -2  118.46    1.08
  -2   4  -2   22.60    0.48
  -1   4  -2    0.75    0.31
   0   4  -2  181.97    1.11
   1   4  -2  101.65    1.19
   2   4  -2  220.60    2.04
   3   4  -2   29.15    1.32
   4   4  -2    2.28    1.12
  -4   5  -2   37.70    1.62
  -3   5  -2   13.55    1.10
  -2   5  -2   50.91    1.11
  -1   5  -2  454.51    2.12
   0   5  -2   18.70    0.60
   1   5  -2  244.02    1.90
   2   5  -2   66.53    1.40
   3   5  -2    1.38    0.87
   4   5  -2   42.44    1.95
  -4   6  -2   12.37    1.44
  -3   6  -2   31.55    1.33
  -2   6  -2  221.04    1.96
  -1   6  -2   30.50    0.84
   0   6  -2  164.56    0.99
   1   6  -2   80.37    1.38
   2   6  -2  109.30    1.76
   3   6  -2  118.87    2.14
   4   6  -2    5.37    1.33
  -4   7  -2   87.59    2.20
  -3   7  -2    4.17    0.86
  -2   7  -2   92.45    1.49
  -1   7  -2  150.19    1.55
   0   7  -2   75.90    2.26
   1   7  -2  383.03    2.83
   2   7  -2   38.25    1.41
   3   7  -2   55.45    1.82
   4   7  -2   25.24    1.88
  -3   8  -2    0.47    0.88
  -2   8  -2  248.54    2.33
  -1   8  -2  171.59    1.76
   0   8  -2  412.88    3.22
   1   8  -2    2.89    0.87
   2   8  -2    0.95    0.89
   3   8  -2  118.28    2.37
  -2   9  -2   94.32    1.73
  -1   9  -2    5.67    0.76
   0   9  -2  130.76    1.20
   1   9  -2  234.76    2.62
   2   9  -2    4.99    1.11
   3   9  -2  108.40    2.44
  -2  10  -2  103.26    1.88
  -1  10  -2  147.81    1.94
   0  10  -2  123.38    1.28
   1  10  -2   24.06    1.45
   2  10  -2    3.03    1.22
   3  10  -2   78.89    2.29
  -2  11  -2   24.36    1.51
  -1  11  -2    0.81    0.94
   0  11  -2  104.23    1.97
   1  11  -2   88.39    2.06
   2  11  -2    2.12    1.28
   3  11  -2   42.65    2.20
  -2  12  -2   92.92    2.26
  -1  12  -2   34.82    1.27
   0  12  -2   43.69    1.64
   1  12  -2    7.37    1.36
   2  12  -2    8.99    1.63
  -1  13  -2    6.31    1.17
   0  13  -2   34.35    1.73
   1  13  -2  101.51    2.48
   0  14  -2   41.29    1.95
   0 -14  -1   23.14    1.49
   1 -14  -1    0.87    0.83
  -2 -13  -1    0.58    0.81
  -1 -13  -1    8.19    0.96
   0 -13  -1   44.62    1.60
   1 -13  -1    2.63    0.80
  -2 -12  -1   52.68    1.66
  -1 -12  -1   26.74    1.35
   0 -12  -1    2.16    0.72
   1 -12  -1    1.30    0.71
   2 -12  -1    7.61    1.40
  -3 -11  -1    0.98    0.75
  -2 -11  -1   10.33    1.16
  -1 -11  -1    9.26    1.02
   0 -11  -1    7.79    0.78
   1 -11  -1    2.32    0.64
   2 -11  -1    0.55    1.13
   3 -11  -1    4.54    1.40
  -3 -10  -1   10.83    1.13
  -2 -10  -1    1.87    0.43
  -1 -10  -1   31.59    1.11
   0 -10  -1   13.33    0.95
   1 -10  -1   56.29    0.99
   2 -10  -1    4.63    0.55
   3 -10  -1    4.81    1.35
  -3  -9  -1   13.53    0.83
  -2  -9  -1  100.58    1.10
  -1  -9  -1   93.34    1.41
   0  -9  -1    1.41    0.46
   1  -9  -1   27.83    0.90
   2  -9  -1    0.37    0.41
   3  -9  -1   56.35    1.91
  -4  -8  -1   71.44    2.14
  -3  -8  -1   33.99    0.92
  -2  -8  -1   14.15    0.62
   0  -8  -1  114.22    1.35
   1  -8  -1  364.58    1.77
   2  -8  -1   16.87    0.66
  -4  -7  -1   13.39    1.50
  -3  -7  -1    3.63    0.80
  -2  -7  -1  196.53    1.29
  -1  -7  -1  519.10    1.72
   0  -7  -1    5.38    0.58
   1  -7  -1   21.53    0.79
   2  -7  -1   12.11    0.56
   3  -7  -1  163.28    2.32
   4  -7  -1   27.76    1.84
  -4  -6  -1   96.18    2.12
  -3  -6  -1   75.98    1.02
  -2  -6  -1   27.54    0.64
   0  -6  -1   58.00    0.85
   1  -6  -1  711.02    3.45
   2  -6  -1   76.81    0.80
   4  -6  -1    1.91    1.23
  -4  -5  -1    3.73    1.05
  -3  -5  -1    5.09    0.81
  -2  -5  -1  157.21    1.06
  -1  -5  -1  180.93    0.90
   0  -5  -1  130.08    1.04
   1  -5  -1   17.69    0.41
   2  -5  -1   48.32    0.62
   3  -5  -1   68.33    1.54
   4  -5  -1   47.73    1.93
  -4  -4  -1   32.84    1.58
  -3  -4  -1   55.67    1.37
  -2  -4  -1   18.80    0.64
  -1  -4  -1    3.74    0.27
   0  -4  -1  118.26    0.61
   1  -4  -1  683.08    1.55
   2  -4  -1   10.41    0.41
   3  -4  -1   12.55    1.06
   4  -4  -1    5.26    1.31
  -4  -3  -1    7.22    1.08
  -3  -3  -1    5.68    0.75
  -2  -3  -1  138.27    1.87
  -1  -3  -1    3.63    0.23
   0  -3  -1  100.52    0.72
   1  -3  -1  108.97    0.62
   2  -3  -1  128.01    0.76
   3  -3  -1   22.11    1.13
   4  -3  -1   48.92    1.91
  -4  -2  -1    6.10    1.00
  -3  -2  -1   29.60    1.19
  -1  -2  -1   13.00    0.28
   0  -2  -1  197.47    0.93
   1  -2  -1  275.91    0.74
   3  -2  -1    1.91    0.75
   4  -2  -1    2.55    1.14
  -4  -1  -1   11.83    1.32
  -3  -1  -1   43.21    1.23
  -1  -1  -1   11.70    0.26
   0  -1  -1    4.09    0.06
   1  -1  -1   64.46    0.66
   2  -1  -1   78.99    1.07
   3  -1  -1   13.24    1.02
   4  -1  -1   30.75    1.62
  -4   0  -1    0.36    0.84
  -3   0  -1    1.40    0.48
  -2   0  -1    0.36    0.30
  -1   0  -1    0.93    0.17
   0   0  -1    0.05    0.02
   3   0  -1    0.80    0.64
   4   0  -1    4.29    1.18
  -5   1  -1    3.71    1.15
  -4   1  -1   10.26    1.20
  -3   1  -1   37.59    1.28
  -1   1  -1   11.93    0.30
   0   1  -1    4.99    0.17
   1   1  -1   64.96    0.71
   2   1  -1   71.00    1.38
   3   1  -1   11.64    0.98
   4   1  -1   31.64    1.67
  -4   2  -1    5.36    0.63
  -3   2  -1   26.52    0.70
  -2   2  -1    9.11    0.56
  -1   2  -1   14.86    0.37
   0   2  -1  232.78    0.85
   1   2  -1  305.05    1.56
   3   2  -1    2.32    0.75
   4   2  -1    3.51    1.06
  -4   3  -1    4.05    0.69
  -3   3  -1    7.68    0.73
  -2   3  -1  140.80    1.55
  -1   3  -1    4.15    0.43
   0   3  -1  111.59    0.73
   1   3  -1  127.34    1.22
   2   3  -1  140.31    1.56
   3   3  -1   22.41    1.19
   4   3  -1   53.28    1.90
  -4   4  -1   26.24    1.45
  -3   4  -1   50.00    0.87
  -2   4  -1   15.27    0.47
  -1   4  -1    4.94    0.47
   0   4  -1  129.26    0.88
   1   4  -1  683.92    2.83
   2   4  -1   18.24    0.96
   3   4  -1   16.35    1.22
   4   4  -1    6.47    1.29
  -4   5  -1    1.63    0.94
  -3   5  -1    4.69    0.74
  -2   5  -1  158.26    1.59
  -1   5  -1  214.55    1.50
   0   5  -1  139.92    1.03
   1   5  -1   33.64    0.93
   2   5  -1   50.67    1.30
   3   5  -1   69.41    1.67
   4   5  -1   50.21    2.06
  -4   6  -1   92.29    2.12
  -3   6  -1   69.98    1.57
  -2   6  -1   28.28    1.07
  -1   6  -1    0.06    0.40
   0   6  -1   57.91    0.81
   1   6  -1  696.12    3.46
   2   6  -1   80.21    1.60
   4   6  -1    1.76    1.28
  -4   7  -1    7.48    1.15
  -3   7  -1    2.82    0.83
  -2   7  -1  202.77    1.99
  -1   7  -1  588.30    2.74
   0   7  -1    7.51    0.50
   2   7  -1   17.48    1.22
   3   7  -1  163.91    2.50
   4   7  -1   28.79    1.91
  -3   8  -1   27.84    1.44
  -2   8  -1   17.02    1.08
  -1   8  -1   21.37    0.99
   0   8  -1  123.73    1.05
   1   8  -1  362.26    3.01
   2   8  -1   20.38    1.35
   3   8  -1    7.01    1.24
  -3   9  -1    4.49    1.05
  -2   9  -1   99.03    1.73
  -1   9  -1   87.59    1.45
   1   9  -1   42.03    1.52
   2   9  -1    2.29    1.04
   3   9  -1   57.78    2.01
  -3  10  -1    5.03    1.14
  -2  10  -1    0.08    0.80
  -1  10  -1   20.33    1.14
   0  10  -1   26.69    1.24
   1  10  -1   58.61    1.78
   2  10  -1    5.99    1.28
   3  10  -1    4.70    1.34
  -2  11  -1    7.81    1.06
  -1  11  -1    2.43    0.88
   0  11  -1   23.38    1.39
   1  11  -1    6.97    1.17
   2  11  -1    3.92    1.31
   3  11  -1    5.02    1.47
  -2  12  -1   42.41    1.75
  -1  12  -1   27.15    1.16
   0  12  -1    8.36    1.13
   1  12  -1    2.77    1.24
   2  12  -1    6.56    1.54
  -1  13  -1    7.14    1.21
   0  13  -1   48.98    1.88
   1  13  -1    6.01    1.39
   0  14  -1   27.23    1.76
   0 -14   0    2.62    0.90
   1 -14   0    8.25    1.02
  -2 -13   0    3.90    0.87
  -1 -13   0   71.71    1.84
   1 -13   0   69.42    1.75
   2 -13   0    2.64    1.51
  -3 -12   0   22.28    1.43
  -2 -12   0   22.38    1.40
  -1 -12   0   31.88    1.35
   0 -12   0    0.82    0.69
   1 -12   0   39.51    1.39
   2 -12   0   21.36    1.75
  -3 -11   0    4.37    0.81
  -2 -11   0    9.61    1.17
  -1 -11   0   84.21    1.63
   0 -11   0   -0.17    0.58
   1 -11   0   85.85    1.56
   2 -11   0   10.75    0.84
   3 -11   0    5.43    1.38
  -3 -10   0   55.24    1.14
  -2 -10   0   35.05    0.84
  -1 -10   0  110.68    1.65
   0 -10   0   -0.26    0.49
   1 -10   0  121.47    1.28
   2 -10   0   34.05    0.90
   3 -10   0   48.20    1.99
  -3  -9   0   17.40    0.86
  -2  -9   0    8.95    0.62
  -1  -9   0  408.61    2.65
   0  -9   0   -0.28    0.42
   1  -9   0  420.82    1.96
   2  -9   0    6.76    0.54
   3  -9   0   19.32    1.64
  -4  -8   0   42.54    1.82
  -3  -8   0  164.49    1.47
  -2  -8   0  135.86    1.17
  -1  -8   0  148.49    1.01
   1  -8   0  148.20    1.22
   2  -8   0  132.34    1.17
   3  -8   0  153.45    2.36
   4  -8   0   42.30    2.12
  -4  -7   0   35.44    1.69
  -3  -7   0    9.49    0.91
  -2  -7   0   11.22    0.55
  -1  -7   0  790.15    4.64
   0  -7   0   -0.48    0.30
   1  -7   0  806.75    3.28
   2  -7   0   10.86    0.57
   4  -7   0   32.84    1.89
  -4  -6   0   15.14    1.48
  -3  -6   0  132.23    1.24
  -2  -6   0   90.94    0.89
  -1  -6   0   70.27    0.88
   0  -6   0   84.61    0.94
   2  -6   0   85.63    0.85
   3  -6   0  126.20    1.99
   4  -6   0   17.01    1.66
  -4  -5   0   21.91    1.49
  -3  -5   0   35.00    0.82
  -2  -5   0   82.97    0.80
  -1  -5   0  236.72    1.04
   0  -5   0    0.12    0.23
   1  -5   0  251.51    1.10
   2  -5   0   77.89    0.73
   3  -5   0   34.93    1.31
   4  -5   0   22.77    1.75
  -4  -4   0    7.26    1.10
  -3  -4   0   57.36    1.40
  -2  -4   0   78.07    1.96
   0  -4   0  101.96    0.83
   2  -4   0   73.68    0.67
   3  -4   0   52.00    1.38
   4  -4   0   10.28    1.42
  -4  -3   0   20.74    1.42
  -3  -3   0   86.28    1.52
  -2  -3   0  248.86    1.16
  -1  -3   0   24.96    0.34
   0  -3   0    0.44    0.15
   1  -3   0   27.21    0.41
   2  -3   0  233.50    1.00
   3  -3   0   79.06    1.54
   4  -3   0   24.55    1.74
  -4  -2   0   37.09    1.50
  -3  -2   0   28.29    1.11
  -2  -2   0  182.15    1.46
   0  -2   0 3609.73   17.48
   2  -2   0  139.71    2.54
   3  -2   0   23.37    1.14
   4  -2   0   38.94    1.76
  -4  -1   0   61.22    1.66
  -3  -1   0  475.17    3.86
  -2  -1   0  912.33    1.90
  -1  -1   0   15.76    0.26
   0  -1   0    4.01    0.32
   1  -1   0   14.22    0.22
   2  -1   0  847.80    3.52
   3  -1   0  458.93    3.02
   4  -1   0   68.14    1.89
  -4   0   0   45.75    1.53
  -3   0   0   12.82    0.80
  -1   0   0   37.78    0.49
   1   0   0   36.51    0.30
   2   0   0  128.60    0.71
   3   0   0   11.09    0.96
   4   0   0   55.23    1.92
  -5   1   0    5.41    1.17
  -4   1   0   60.91    1.08
  -3   1   0  468.97    2.91
  -2   1   0  907.08    1.91
  -1   1   0   17.00    0.27
   0   1   0    3.61    0.11
   1   1   0   17.02    0.49
   2   1   0  873.15    3.87
   3   1   0  442.57    2.95
   4   1   0   70.12    1.91
  -4   2   0   34.79    0.94
  -3   2   0   25.37    0.66
  -2   2   0  172.25    2.88
   0   2   0 3611.80   20.64
   2   2   0  158.68    1.52
   3   2   0   26.10    1.14
   4   2   0   38.86    1.72
  -4   3   0   17.66    0.87
  -3   3   0   81.57    0.92
  -2   3   0  247.09    1.06
   0   3   0    0.71    0.19
   1   3   0   30.10    0.71
   2   3   0  248.39    1.99
   3   3   0   79.28    1.58
   4   3   0   27.79    1.75
  -4   4   0    5.76    0.97
  -3   4   0   52.45    0.82
  -2   4   0   78.80    0.71
   0   4   0  103.51    0.76
   2   4   0   76.42    1.35
   3   4   0   56.14    1.54
   4   4   0    9.99    1.34
  -4   5   0   18.73    1.42
  -3   5   0   33.10    1.18
  -2   5   0   88.63    1.28
  -1   5   0  253.92    1.56
   0   5   0    0.27    0.26
   1   5   0  240.07    1.91
   2   5   0   80.62    1.47
   3   5   0   35.70    1.41
   4   5   0   28.23    1.82
  -4   6   0   12.11    1.19
  -3   6   0  125.85    1.90
  -2   6   0   87.02    1.32
   0   6   0   89.25    1.80
   2   6   0   89.66    1.67
   3   6   0  127.65    2.19
   4   6   0   17.44    1.78
  -4   7   0   28.33    1.68
  -3   7   0    4.84    0.86
  -2   7   0   10.16    0.92
  -1   7   0  835.35    3.19
   0   7   0   -0.18    0.31
   1   7   0  796.72    4.01
   2   7   0   11.50    1.18
   3   7   0   16.31    1.45
   4   7   0   37.33    1.98
  -3   8   0  160.63    2.33
  -2   8   0  134.21    1.80
  -1   8   0  151.36    1.60
   0   8   0    3.88    0.46
   1   8   0  164.08    2.17
   2   8   0  131.46    2.18
   3   8   0  153.47    2.58
  -3   9   0    9.65    1.12
  -2   9   0    4.86    0.81
  -1   9   0  435.65    2.69
   0   9   0   -0.51    0.44
   1   9   0  427.73    3.43
   2   9   0    8.63    1.26
   3   9   0   19.11    1.67
  -3  10   0   43.33    1.77
  -2  10   0   31.62    1.38
  -1  10   0  113.77    1.67
   0  10   0    1.33    0.78
   1  10   0  114.24    2.16
   2  10   0   32.62    1.74
   3  10   0   47.38    2.05
  -3  11   0   -0.51    1.13
  -2  11   0    5.35    1.03
  -1  11   0   75.48    1.63
   0  11   0    1.45    0.91
   1  11   0   86.17    2.10
   2  11   0   10.36    1.48
   3  11   0    5.45    1.51
  -2  12   0   12.92    1.49
  -1  12   0   34.88    1.86
   0  12   0    0.14    0.92
   1  12   0   31.56    1.74
   2  12   0   18.93    1.88
  -1  13   0   64.94    1.95
   0  13   0    4.94    1.24
   1  13   0   68.69    2.22
   0  14   0    1.03    1.22
   0 -14   1   30.83    1.56
   1 -14   1   35.50    1.62
  -2 -13   1   27.86    1.52
   0 -13   1   49.95    1.63
   1 -13   1    7.32    0.96
   2 -13   1   -0.60    1.33
  -2 -12   1    9.52    0.99
  -1 -12   1    2.43    0.72
   0 -12   1   10.16    1.21
   1 -12   1   30.88    1.32
   2 -12   1   52.89    1.24
  -3 -11   1    3.77    0.85
   1 -11   1    6.81    0.76
   2 -11   1   12.35    0.86
   3 -11   1    2.83    1.33
  -3 -10   1    3.31    0.55
  -2 -10   1   10.15    1.05
  -1 -10   1   57.19    1.31
   1 -10   1   26.12    0.83
   2 -10   1    3.28    1.06
   3 -10   1   16.01    1.74
  -3  -9   1   60.49    1.10
  -1  -9   1   40.37    1.09
   1  -9   1   95.49    1.68
   2  -9   1  101.18    1.15
  -4  -8   1   11.94    1.43
  -3  -8   1    3.35    0.62
  -2  -8   1   20.67    0.65
  -1  -8   1  354.57    1.57
   0  -8   1  131.83    1.40
   1  -8   1   26.22    0.69
   2  -8   1   20.84    0.71
   3  -8   1   45.63    1.68
   4  -8   1   60.83    2.22
  -4  -7   1   29.13    1.63
  -3  -7   1  171.64    2.10
  -2  -7   1   18.73    0.87
   0  -7   1    6.85    0.57
   1  -7   1  572.23    2.31
   2  -7   1  198.20    1.29
   4  -7   1   18.28    1.78
  -4  -6   1   -0.13    0.97
  -2  -6   1   79.84    0.82
  -1  -6   1  681.22    1.78
   0  -6   1   55.63    0.83
   1  -6   1    1.72    0.49
   2  -6   1   27.35    0.61
   3  -6   1   76.79    1.69
   4  -6   1   89.48    2.24
  -4  -5   1   48.86    1.70
  -3  -5   1   72.74    1.50
  -2  -5   1   52.22    0.68
  -1  -5   1   27.78    0.98
   0  -5   1  128.04    1.05
   1  -5   1  202.20    1.13
   2  -5   1  151.59    0.98
   3  -5   1    9.14    1.09
   4  -5   1    7.35    1.31
  -4  -4   1    4.48    0.98
  -3  -4   1   12.98    1.04
  -2  -4   1   14.03    0.56
  -1  -4   1  661.08    1.84
   0  -4   1  117.30    0.89
   1  -4   1    5.97    0.29
   2  -4   1   15.08    0.46
   3  -4   1   49.62    1.37
   4  -4   1   29.86    1.82
  -4  -3   1   45.22    1.59
  -3  -3   1   23.32    1.12
  -2  -3   1  135.91    0.89
  -1  -3   1  113.10    1.18
   0  -3   1  102.11    2.73
   1  -3   1    5.67    0.35
   2  -3   1  131.77    1.31
   3  -3   1    6.10    0.87
   4  -3   1   16.81    1.66
  -4  -2   1    0.42    0.86
  -3  -2   1    2.38    0.63
  -1  -2   1  266.58    4.25
   0  -2   1  200.67    5.34
   1  -2   1   13.56    0.26
   2  -2   1    9.28    0.66
   3  -2   1   24.09    1.16
   4  -2   1   13.19    1.51
  -4  -1   1   17.95    1.33
  -3  -1   1   11.86    0.58
  -2  -1   1   82.58    1.01
  -1  -1   1   61.73    0.58
   0  -1   1    4.02    0.13
   1  -1   1   12.41    0.23
   2  -1   1   70.85    1.75
   3  -1   1   41.30    1.26
  -4   0   1    0.84    0.82
  -3   0   1    0.50    0.37
   0   0   1    0.24    0.03
   3   0   1    1.44    0.72
   4   0   1    4.03    1.15
  -5   1   1    2.85    1.10
  -4   1   1   17.05    0.84
  -3   1   1   12.68    0.59
  -2   1   1   81.48    0.65
  -1   1   1   65.97    0.56
   1   1   1   12.19    0.50
   2   1   1   70.67    1.37
   3   1   1   39.17    1.22
   4   1   1   26.83    1.63
  -4   2   1    0.04    0.53
  -3   2   1    2.06    0.38
  -1   2   1  273.44    0.77
   0   2   1  193.09    0.63
   1   2   1   14.68    0.61
   3   2   1   25.16    1.14
   4   2   1   12.48    1.51
  -4   3   1   45.02    1.04
  -3   3   1   22.84    0.66
  -2   3   1  137.08    0.83
  -1   3   1  110.19    0.88
   0   3   1  101.70    0.62
   1   3   1    4.58    0.52
   2   3   1  140.98    1.57
   3   3   1    9.65    1.04
   4   3   1   18.72    1.64
  -4   4   1    2.70    0.84
  -3   4   1   10.66    0.61
  -2   4   1   12.15    0.53
  -1   4   1  674.68    2.23
   0   4   1  123.90    0.80
   2   4   1   23.21    1.01
   3   4   1   54.95    0.95
   4   4   1   32.30    1.77
  -4   5   1   46.18    1.62
  -3   5   1   74.85    1.49
  -2   5   1   49.66    0.58
  -1   5   1   17.97    0.61
   0   5   1  134.46    0.94
   1   5   1  197.77    1.80
   2   5   1  151.44    1.85
   3   5   1    9.50    1.18
   4   5   1    5.71    1.27
  -4   6   1   -0.91    0.92
  -3   6   1    2.84    0.73
  -2   6   1   88.61    1.38
  -1   6   1  752.21    2.83
   0   6   1   57.18    0.76
   2   6   1   31.89    1.31
   3   6   1   79.29    1.87
   4   6   1   91.46    2.37
  -4   7   1   23.39    1.60
  -3   7   1  173.11    2.25
  -2   7   1   12.04    0.86
  -1   7   1   25.20    0.86
   0   7   1    6.77    0.40
   1   7   1  556.85    3.41
   2   7   1  192.34    2.35
   4   7   1   16.18    1.79
  -3   8   1    3.02    0.83
  -2   8   1   16.09    1.06
  -1   8   1  386.26    2.34
   0   8   1  112.49    0.98
   1   8   1   48.69    1.41
   2   8   1   16.66    1.36
   3   8   1   40.03    1.79
  -3   9   1   54.89    1.72
  -2   9   1   -0.38    0.70
  -1   9   1   27.75    1.02
   0   9   1   -0.07    0.43
   1   9   1   94.54    1.79
   2   9   1   98.19    2.10
   3   9   1   16.47    1.66
  -3  10   1    1.32    0.99
  -2  10   1    2.63    0.85
  -1  10   1   52.79    1.32
   0  10   1   11.09    0.68
   1  10   1   30.48    1.52
   2  10   1    0.83    1.13
   3  10   1   10.43    1.48
  -3  11   1   -0.72    1.09
  -2  11   1   -2.04    0.86
  -1  11   1   -1.20    0.75
   0  11   1    8.75    1.08
   1  11   1    9.92    1.39
   2  11   1   15.34    1.68
   3  11   1    2.41    1.40
  -2  12   1    2.51    1.04
   0  12   1    3.44    1.04
   1  12   1   23.01    1.73
   2  12   1   45.40    2.21
  -2  13   1   12.43    1.39
  -1  13   1    3.65    1.10
   0  13   1   41.00    1.83
   1  13   1    9.06    1.51
   0  14   1   19.91    1.76
   0 -14   2   46.45    1.73
   1 -14   2    4.27    0.96
  -2 -13   2   27.70    1.59
  -1 -13   2  107.02    2.11
   0 -13   2   37.58    1.54
   1 -13   2    3.64    0.86
   2 -13   2    3.66    1.41
  -2 -12   2    9.42    0.95
  -1 -12   2    6.96    0.83
   0 -12   2   45.08    1.45
   1 -12   2   38.36    1.42
   2 -12   2  103.25    1.48
  -2 -11   2    2.43    0.69
  -1 -11   2   87.20    1.64
   0 -11   2  109.52    1.71
   1 -11   2    4.37    0.70
   2 -11   2   30.74    1.03
   3 -11   2    1.33    1.32
  -3 -10   2   91.72    1.87
  -1 -10   2   25.33    1.06
   0 -10   2  131.31    1.70
   1 -10   2  152.91    1.42
   2 -10   2  111.56    1.44
   3 -10   2    4.34    1.33
  -3  -9   2  115.39    1.93
  -1  -9   2  235.20    2.09
   0  -9   2  129.52    1.50
   1  -9   2    8.89    0.65
   2  -9   2   93.49    1.14
   3  -9   2    5.43    1.18
  -4  -8   2   16.14    1.53
  -3  -8   2  124.65    1.91
  -2  -8   2    0.86    0.52
   0  -8   2  410.37    2.37
   1  -8   2  169.70    1.24
   2  -8   2  242.78    1.51
   3  -8   2   15.02    1.43
   4  -8   2    6.74    1.45
  -4  -7   2   23.51    1.52
  -3  -7   2   54.58    1.41
  -2  -7   2   37.23    0.67
  -1  -7   2  368.20    1.40
   0  -7   2   69.46    1.00
   1  -7   2  155.05    1.41
   2  -7   2   92.07    0.97
   4  -7   2   93.48    2.35
  -4  -6   2    3.81    1.04
  -3  -6   2  123.17    1.81
  -2  -6   2  109.11    0.92
  -1  -6   2   74.07    0.65
   0  -6   2  153.83    1.26
   1  -6   2   30.86    0.57
   2  -6   2  215.92    1.25
   3  -6   2   39.75    1.43
   4  -6   2   23.09    1.69
  -4  -5   2   35.59    1.55
  -3  -5   2    0.26    0.69
  -2  -5   2   67.07    0.71
  -1  -5   2  234.27    0.97
   0  -5   2   15.35    0.49
   1  -5   2  441.94    2.29
   2  -5   2   50.44    0.68
   3  -5   2   22.01    1.21
   4  -5   2   47.47    1.92
  -4  -4   2    0.54    0.89
  -3  -4   2   25.60    1.14
  -2  -4   2  213.97    1.96
  -1  -4   2   98.68    0.61
   0  -4   2  165.63    1.05
   1  -4   2    0.20    0.18
   2  -4   2   25.87    0.53
   3  -4   2  116.29    1.77
   4  -4   2   14.14    1.69
  -4  -3   2   77.31    1.80
  -3  -3   2    0.18    0.63
  -2  -3   2  235.10    1.03
  -1  -3   2  120.65    1.66
   0  -3   2  329.02    1.26
   1  -3   2  276.74    0.95
   3  -3   2  116.71    1.75
   4  -3   2   25.65    1.71
  -4  -2   2    0.40    0.85
  -3  -2   2    2.09    0.37
  -2  -2   2  700.95    1.61
  -1  -2   2  129.08    1.60
   0  -2   2  867.53    3.76
   1  -2   2    7.73    0.25
   3  -2   2  353.26    2.67
   4  -2   2    6.36    1.13
  -4  -1   2  225.60    2.54
  -3  -1   2    1.10    0.37
  -2  -1   2  318.70    1.80
  -1  -1   2    7.86    0.18
   0  -1   2  272.38    3.41
   1  -1   2 2944.06    6.88
   2  -1   2  131.33    0.97
   3  -1   2  195.34    2.09
  -4   0   2    9.26    1.02
  -3   0   2    9.44    0.58
  -2   0   2 1984.27    7.36
  -1   0   2  312.34    1.19
   0   0   2  636.75    2.25
   1   0   2    9.40    0.37
   2   0   2   27.61    0.85
   3   0   2  605.31    3.33
   4   0   2   18.40    1.67
  -4   1   2  228.86    1.70
  -3   1   2    2.03    0.42
  -2   1   2  315.47    1.70
  -1   1   2    8.38    0.30
   1   1   2 2957.26    9.64
   2   1   2  114.26    2.35
   3   1   2  188.22    2.03
  -4   2   2    0.27    0.53
  -3   2   2    1.69    0.38
  -2   2   2  692.04    2.40
  -1   2   2  134.18    0.76
   1   2   2    8.26    0.52
   2   2   2   16.29    0.45
   3   2   2  349.15    2.73
   4   2   2    6.15    1.14
  -4   3   2   74.19    1.17
  -3   3   2    0.05    0.36
  -2   3   2  234.99    1.12
  -1   3   2  124.60    0.57
   0   3   2  336.29    1.01
   1   3   2  272.81    1.64
   2   3   2   38.18    1.02
   3   3   2  116.07    1.14
   4   3   2   24.80    1.67
  -4   4   2   -0.08    0.82
  -3   4   2   22.51    0.66
  -2   4   2  217.22    1.09
  -1   4   2  101.69    0.93
   0   4   2  171.27    0.87
   1   4   2    0.88    0.48
   2   4   2   19.54    0.98
   3   4   2  111.50    1.11
   4   4   2   16.17    1.62
  -4   5   2   35.58    1.52
  -3   5   2    0.17    0.63
  -2   5   2   66.85    0.67
  -1   5   2  228.00    1.44
   0   5   2   15.52    0.43
   1   5   2  431.91    2.55
   2   5   2   40.73    1.22
   3   5   2   12.41    1.22
   4   5   2   45.70    1.94
  -4   6   2    1.31    0.93
  -3   6   2  120.71    1.84
  -2   6   2  110.17    1.42
  -1   6   2   81.05    1.04
   0   6   2  164.37    1.12
   1   6   2   31.00    1.05
   2   6   2  206.73    2.28
   3   6   2   44.85    1.62
   4   6   2   25.37    1.87
  -4   7   2   18.80    1.58
  -3   7   2   52.56    1.47
  -2   7   2   36.91    1.11
  -1   7   2  379.04    2.13
   0   7   2   62.36    1.14
   1   7   2  145.23    1.81
   2   7   2   83.59    1.74
   3   7   2    6.30    1.12
   4   7   2   93.56    2.41
  -3   8   2  120.82    2.03
  -2   8   2   -0.16    0.58
  -1   8   2    1.46    0.52
   0   8   2  415.55    2.48
   1   8   2  153.03    2.04
   2   8   2  224.53    2.69
  -3   9   2  112.96    2.10
  -2   9   2    1.43    0.72
  -1   9   2  255.64    2.10
   0   9   2  121.82    1.08
   1   9   2   17.41    0.96
   2   9   2   86.82    2.04
   3   9   2    5.04    1.31
  -3  10   2   79.20    2.03
  -2  10   2    0.76    0.79
  -1  10   2   17.03    1.05
   0  10   2  116.60    1.89
   1  10   2  116.28    1.97
   2  10   2   99.88    2.28
   3  10   2    3.10    1.33
  -3  11   2   37.88    1.81
  -2  11   2   -2.38    0.84
  -1  11   2   89.84    1.63
   0  11   2  102.18    1.98
   1  11   2    6.06    1.23
   2  11   2   26.33    1.81
   3  11   2    0.60    1.37
  -2  12   2    4.77    1.10
  -1  12   2    0.00    0.89
   0  12   2   39.52    1.60
   1  12   2   29.28    1.75
   2  12   2   89.80    2.49
  -2  13   2   17.14    1.44
  -1  13   2  110.81    2.30
   0  13   2   36.47    1.78
   1  13   2    4.69    1.47
   0  14   2   33.08    1.88
   0 -14   3   69.56    1.89
   1 -14   3   57.38    1.82
  -2 -13   3   30.06    1.55
  -1 -13   3   24.44    1.42
   0 -13   3    8.48    0.96
   1 -13   3    1.14    0.79
   2 -13   3    1.90    0.72
  -1 -12   3   28.75    1.37
   1 -12   3   35.89    1.37
   2 -12   3   20.46    1.06
  -1 -11   3   21.71    1.12
   0 -11   3   19.94    1.11
   1 -11   3    3.70    0.71
   2 -11   3   19.89    0.96
   3 -11   3   20.12    1.82
  -3 -10   3   14.91    1.27
  -1 -10   3   44.93    1.21
   1 -10   3    8.56    0.72
   2 -10   3   17.49    0.87
   3 -10   3   13.85    1.72
  -3  -9   3   84.68    1.73
  -2  -9   3   33.97    0.75
  -1  -9   3    2.59    0.51
   0  -9   3  105.12    1.42
   1  -9   3   19.71    0.72
   2  -9   3   51.30    0.96
   3  -9   3    4.21    1.20
  -4  -8   3   12.04    1.33
  -3  -8   3   56.64    1.47
  -2  -8   3   49.95    0.77
  -1  -8   3   48.52    0.66
   0  -8   3   99.77    1.29
   1  -8   3   16.52    0.63
   2  -8   3   84.15    1.03
   3  -8   3   35.08    1.62
   4  -8   3   22.73    1.89
  -4  -7   3   14.44    1.41
  -3  -7   3   48.84    1.38
  -2  -7   3   15.58    0.54
  -1  -7   3  242.25    1.16
   0  -7   3  283.89    1.84
   1  -7   3    1.08    0.33
   2  -7   3   77.69    0.93
   3  -7   3   10.83    1.34
   4  -7   3   44.84    2.03
  -4  -6   3   22.87    1.47
  -3  -6   3  130.29    1.82
  -2  -6   3   88.41    0.84
  -1  -6   3   29.54    0.47
   0  -6   3   20.41    0.62
   1  -6   3  207.00    1.14
   2  -6   3  356.42    2.21
   4  -6   3   21.54    1.70
  -4  -5   3    9.58    1.12
  -3  -5   3    6.35    0.79
  -2  -5   3   30.01    0.82
  -1  -5   3  440.87    4.63
   0  -5   3  500.79    2.02
   1  -5   3   28.48    1.06
   2  -5   3  115.40    0.91
   3  -5   3   34.60    1.29
   4  -5   3   62.90    2.04
  -4  -4   3    2.98    0.95
  -3  -4   3  124.61    1.71
  -2  -4   3   80.82    0.70
  -1  -4   3    3.74    0.37
   0  -4   3  118.37    0.92
   1  -4   3  335.20    1.80
   2  -4   3  264.05    1.22
   4  -4   3   14.96    1.74
  -4  -3   3   32.88    1.47
  -3  -3   3    3.50    0.72
  -2  -3   3   31.21    0.50
  -1  -3   3  146.81    0.90
   1  -3   3  324.92    1.07
   2  -3   3  290.41    2.40
   3  -3   3   33.04    1.22
   4  -3   3   35.37    1.76
  -4  -2   3    0.52    0.89
  -3  -2   3   25.69    1.03
  -2  -2   3  371.24    1.14
  -1  -2   3  109.09    1.20
   0  -2   3  152.09    0.47
   1  -2   3   78.65    0.51
   2  -2   3   91.66    0.70
   3  -2   3   29.99    1.22
   4  -2   3    6.29    1.15
  -4  -1   3   23.48    1.33
  -3  -1   3    3.35    0.62
  -2  -1   3    1.18    0.35
  -1  -1   3   50.48    0.34
   0  -1   3   41.47    0.38
   1  -1   3  901.68    2.42
   2  -1   3  106.25    0.74
  -4   0   3    1.40    0.84
  -1   0   3    0.22    0.18
   0   0   3    0.61    0.10
   1   0   3    0.08    0.15
   2   0   3    0.13    0.22
   4   0   3    3.69    1.15
  -4   1   3   23.18    0.83
  -3   1   3    2.10    0.39
  -2   1   3    1.21    0.34
  -1   1   3   53.38    0.55
   1   1   3  937.24   12.87
   2   1   3  108.36    0.78
  -4   2   3    0.83    0.51
  -3   2   3   23.88    0.66
  -2   2   3  375.63    1.82
  -1   2   3  111.59    0.74
   1   2   3   81.15    0.88
   2   2   3   91.79    0.77
   3   2   3   22.93    0.67
   4   2   3    4.86    1.12
  -4   3   3   30.80    0.93
  -3   3   3    3.01    0.41
  -2   3   3   32.67    0.51
  -1   3   3  145.63    0.82
   1   3   3  310.48    1.74
   2   3   3  278.62    2.07
   3   3   3   28.48    0.72
   4   3   3   34.30    1.74
  -4   4   3    2.75    0.86
  -3   4   3  123.89    1.34
  -2   4   3   83.27    0.70
  -1   4   3    1.97    0.17
   0   4   3  118.11    0.72
   1   4   3  321.25    1.98
   2   4   3  259.07    2.14
   3   4   3    3.51    0.83
   4   4   3   15.15    1.61
  -4   5   3    9.79    1.06
  -3   5   3    5.30    0.72
  -2   5   3   26.81    0.49
  -1   5   3  437.69    1.95
   0   5   3  497.45    1.61
   1   5   3   28.23    0.93
   2   5   3  103.15    1.60
   3   5   3   35.38    0.84
   4   5   3   60.33    2.02
  -4   6   3   21.23    1.44
  -3   6   3  129.58    1.85
  -2   6   3   87.69    1.28
  -1   6   3   30.43    0.73
   1   6   3  198.53    1.96
   2   6   3  339.49    2.81
   3   6   3    4.66    1.02
   4   6   3   24.46    1.83
  -4   7   3   13.58    1.46
  -3   7   3   48.15    1.46
  -2   7   3   13.50    0.87
  -1   7   3  262.71    1.85
   0   7   3  268.53    2.08
   1   7   3    2.95    0.62
   2   7   3   55.03    1.54
   3   7   3   13.69    1.38
   4   7   3   42.38    2.01
  -3   8   3   55.45    1.59
  -2   8   3   52.01    1.31
  -1   8   3   49.17    1.03
   0   8   3   99.12    1.41
   1   8   3   14.27    0.97
   2   8   3   72.23    1.79
   3   8   3   17.82    1.52
  -3   9   3   86.58    1.98
  -2   9   3   29.45    1.21
  -1   9   3    2.43    0.59
   0   9   3  101.11    1.64
   1   9   3   13.16    0.99
   2   9   3   40.43    1.70
   3   9   3    2.91    1.29
  -3  10   3   12.24    1.21
  -2  10   3   -0.49    0.74
  -1  10   3   44.51    1.22
   0  10   3   47.46    1.42
   1  10   3   11.37    1.28
   2  10   3    4.90    1.22
   3  10   3   11.91    1.54
  -3  11   3   13.68    1.61
  -2  11   3   -1.00    0.88
  -1  11   3   16.64    1.15
   0  11   3   21.88    1.37
   1  11   3    3.64    1.18
   2  11   3   15.39    1.58
   3  11   3   17.92    1.84
  -1  12   3   12.36    1.27
   0  12   3   24.71    1.52
   1  12   3   26.98    1.77
   2  12   3    5.54    1.49
  -2  13   3   14.56    1.53
  -1  13   3   29.46    1.68
   0  13   3    9.93    1.38
   1  13   3   -1.49    1.29
   0  14   3   42.92    1.96
   0 -14   4  109.09    2.23
  -2 -13   4   55.43    1.76
  -1 -13   4    5.61    0.90
   0 -13   4    0.99    0.73
   1 -13   4   21.74    1.40
   2 -13   4   42.28    1.32
  -2 -12   4   24.01    1.39
   0 -12   4  270.83    2.69
   1 -12   4   37.46    1.39
   2 -12   4    2.68    0.70
  -2 -11   4  139.33    2.03
  -1 -11   4    3.71    0.68
   0 -11   4   10.21    1.00
   1 -11   4    0.27    0.63
   2 -11   4  121.39    1.53
   3 -11   4   91.38    2.40
  -3 -10   4    3.14    0.88
  -2 -10   4   60.45    1.40
  -1 -10   4   49.61    1.25
   0 -10   4  359.06    2.62
   1 -10   4   18.93    0.81
   2 -10   4   21.46    0.89
   3 -10   4   11.95    1.53
  -3  -9   4   99.82    1.80
  -2  -9   4  149.43    1.24
  -1  -9   4    4.73    0.56
   0  -9   4   10.17    0.77
   1  -9   4   10.30    0.67
   2  -9   4  154.35    1.62
   3  -9   4   47.06    1.83
  -3  -8   4    6.31    0.87
  -2  -8   4   54.84    0.81
  -1  -8   4   16.76    0.50
   0  -8   4  367.11    2.28
   1  -8   4    2.48    0.40
   2  -8   4   65.73    0.96
   3  -8   4   20.48    1.55
   4  -8   4   16.24    1.84
  -4  -7   4   26.40    1.52
  -3  -7   4   48.43    1.34
  -2  -7   4  198.93    1.23
  -1  -7   4  143.59    0.90
   0  -7   4    6.28    0.58
   1  -7   4    7.61    0.50
   2  -7   4   71.58    0.91
   3  -7   4   30.76    1.50
   4  -7   4   32.11    1.90
  -4  -6   4    0.92    0.95
  -3  -6   4   27.43    1.16
  -2  -6   4    1.74    0.30
  -1  -6   4   10.71    0.38
   0  -6   4  387.46    1.99
   1  -6   4   18.77    0.51
   2  -6   4  332.88    3.76
   3  -6   4   41.54    1.47
   4  -6   4    4.26    1.24
  -4  -5   4   43.69    1.65
  -3  -5   4   10.64    0.98
  -2  -5   4  158.53    0.99
  -1  -5   4  876.60    2.04
   0  -5   4   13.34    0.50
   1  -5   4   68.48    0.66
   2  -5   4   24.71    0.59
   3  -5   4    6.17    0.93
   4  -5   4   59.41    2.01
  -4  -4   4   25.53    1.42
  -3  -4   4   85.54    1.55
  -2  -4   4   66.47    0.65
  -1  -4   4  222.81    0.90
   0  -4   4  239.13    1.31
   1  -4   4  271.28    1.08
   2  -4   4  255.74    1.23
   3  -4   4  102.68    1.71
   4  -4   4   31.68    1.81
  -4  -3   4  110.01    1.99
  -3  -3   4    0.43    0.58
  -2  -3   4    3.99    0.30
  -1  -3   4  572.74    2.52
   0  -3   4    1.71    0.22
   1  -3   4 1612.38    6.96
   2  -3   4   24.34    0.50
   3  -3   4   10.24    1.01
   4  -3   4   80.33    2.08
  -4  -2   4   50.22    1.53
  -3  -2   4  242.31    2.15
  -2  -2   4  485.07    1.28
  -1  -2   4  482.58    1.55
   0  -2   4    1.40    0.11
   1  -2   4  350.63    1.02
   2  -2   4   58.83    0.62
   3  -2   4  141.91    1.82
   4  -2   4   64.04    1.85
  -4  -1   4   94.18    1.82
  -3  -1   4   36.53    1.08
  -2  -1   4   62.52    0.92
  -1  -1   4  748.38    1.66
   0  -1   4    2.35    0.25
   1  -1   4 1886.27    4.65
   2  -1   4    5.33    0.36
   3  -1   4    8.93    1.01
   4  -1   4   96.57    2.13
  -4   0   4   75.93    1.70
  -3   0   4  388.32    2.52
  -2   0   4  508.60    2.24
  -1   0   4  254.26    1.18
   0   0   4  176.85    0.76
   1   0   4  167.21    1.16
   2   0   4   94.68    0.75
   3   0   4  144.86    2.78
   4   0   4   56.33    1.97
  -4   1   4   98.05    1.22
  -3   1   4   34.12    1.04
  -2   1   4   62.07    0.87
  -1   1   4  744.37    2.96
   0   1   4    1.57    0.17
   1   1   4 1900.68    8.61
   2   1   4    4.83    0.54
   3   1   4    7.92    0.95
   4   1   4   95.02    2.13
  -4   2   4   50.22    1.01
  -3   2   4  236.01    1.40
  -2   2   4  487.38    2.11
  -1   2   4  489.94    1.60
   1   2   4  356.72    1.65
   2   2   4   58.12    0.67
   3   2   4  142.50    1.19
   4   2   4   63.89    1.89
  -4   3   4  111.20    1.34
  -3   3   4   -0.19    0.36
  -2   3   4    3.40    0.38
  -1   3   4  595.68    1.79
   1   3   4 1563.44    6.19
   2   3   4   21.34    0.91
   3   3   4    8.10    0.58
   4   3   4   79.98    2.13
  -4   4   4   27.22    1.39
  -3   4   4   81.32    0.93
  -2   4   4   65.40    0.65
  -1   4   4  238.08    1.17
   1   4   4  263.55    1.81
   2   4   4  249.60    2.10
   3   4   4   97.47    1.11
   4   4   4   32.88    1.80
  -4   5   4   44.06    1.65
  -3   5   4    9.54    0.91
  -2   5   4  159.56    0.94
  -1   5   4  923.13    4.56
   1   5   4   68.27    1.19
   2   5   4   22.16    1.10
   3   5   4    5.35    0.52
   4   5   4   62.59    2.08
  -4   6   4    1.64    0.99
  -3   6   4   26.27    1.15
  -2   6   4    0.87    0.27
  -1   6   4    9.32    0.58
   1   6   4   19.57    1.00
   2   6   4  301.53    2.66
   3   6   4   32.85    1.46
   4   6   4    2.24    1.22
  -4   7   4   23.72    1.53
  -3   7   4   48.95    1.43
  -2   7   4  197.70    1.88
  -1   7   4  152.27    1.40
   0   7   4    5.75    0.65
   1   7   4    9.28    0.94
   2   7   4   62.54    1.58
   3   7   4   27.41    1.49
   4   7   4   31.55    1.86
  -3   8   4    5.33    0.95
  -2   8   4   55.14    1.32
  -1   8   4   17.81    0.83
   0   8   4  363.11    2.65
   1   8   4    2.56    0.72
   2   8   4   50.38    1.63
   3   8   4   17.67    1.54
  -3   9   4   98.45    2.03
  -2   9   4  146.74    1.90
  -1   9   4    4.32    0.61
   0   9   4    7.76    0.86
   1   9   4   13.85    1.22
   2   9   4  140.37    2.38
   3   9   4   44.67    1.88
  -3  10   4    0.74    0.96
  -2  10   4   56.03    1.56
  -1  10   4   48.59    1.23
   0  10   4  348.25    2.99
   1  10   4   14.80    1.27
   2  10   4   17.59    1.62
   3  10   4    8.98    1.46
  -3  11   4   39.05    1.90
  -2  11   4  133.46    2.10
  -1  11   4   -0.29    0.71
   0  11   4    8.98    1.14
   1  11   4   -0.45    1.08
   2  11   4  109.85    2.46
   3  11   4   89.24    2.60
  -2  12   4   11.56    1.41
   0  12   4  247.54    2.94
   1  12   4   28.32    1.78
   2  12   4    2.59    1.43
  -2  13   4   36.87    1.81
  -1  13   4    8.53    1.28
   0  13   4   -0.49    1.12
   1  13   4   20.25    1.78
   0  14   4  100.02    2.44
  -2 -13   5    3.65    0.86
  -1 -13   5    5.11    0.87
   0 -13   5    3.24    0.79
   1 -13   5   50.86    1.66
   2 -13   5   35.00    1.61
  -2 -12   5   14.40    1.23
  -1 -12   5   86.32    1.80
   1 -12   5   12.35    1.23
   2 -12   5    0.11    0.66
  -2 -11   5   27.54    1.26
  -1 -11   5    0.42    0.58
   0 -11   5   40.86    1.26
   1 -11   5    1.71    0.67
   2 -11   5   35.63    1.08
   3 -11   5   31.87    1.92
  -3 -10   5    0.62    0.80
  -2 -10   5   78.06    1.53
  -1 -10   5    0.84    0.53
   0 -10   5    3.43    0.57
   1 -10   5   27.01    1.08
   2 -10   5   28.18    0.95
   3 -10   5   16.09    1.75
  -3  -9   5    6.40    0.91
  -2  -9   5   50.38    0.82
  -1  -9   5    1.24    0.47
   0  -9   5  106.43    1.44
   1  -9   5   38.11    0.85
   3  -9   5    7.46    1.30
  -3  -8   5   -0.55    0.72
  -2  -8   5   71.08    1.01
  -1  -8   5   63.45    0.70
   0  -8   5    6.57    0.68
   1  -8   5   34.99    0.74
   2  -8   5   52.17    0.93
   3  -8   5   30.85    1.69
   4  -8   5    1.22    1.32
  -4  -7   5    7.81    1.16
  -3  -7   5   30.35    1.19
  -2  -7   5   75.81    0.84
  -1  -7   5   11.17    0.43
   0  -7   5  237.95    1.75
   1  -7   5    6.29    0.51
   2  -7   5   93.24    1.42
   3  -7   5   16.26    1.36
   4  -7   5    7.64    1.43
  -4  -6   5   16.03    1.41
  -3  -6   5   22.09    1.09
  -2  -6   5   46.96    0.67
  -1  -6   5  147.42    0.87
   0  -6   5  184.48    1.43
   1  -6   5   61.13    0.72
   2  -6   5   98.77    0.96
   3  -6   5   66.63    1.65
   4  -6   5   14.05    1.58
  -4  -5   5   32.16    1.52
  -3  -5   5   56.61    1.36
  -2  -5   5  159.97    1.25
  -1  -5   5    4.31    0.30
   0  -5   5  495.29    2.09
   1  -5   5   61.16    0.65
   2  -5   5  182.94    1.15
   3  -5   5   54.72    1.46
   4  -5   5   21.18    1.74
  -4  -4   5   33.15    1.50
  -3  -4   5   44.37    1.20
  -2  -4   5  121.08    1.13
  -1  -4   5  293.52    1.04
   0  -4   5  215.19    1.29
   1  -4   5   71.79    0.62
   2  -4   5   82.46    0.80
   3  -4   5  138.18    1.87
   4  -4   5   28.78    1.78
  -4  -3   5   63.60    1.67
  -3  -3   5   32.35    1.11
  -2  -3   5   50.29    0.85
  -1  -3   5  102.52    0.59
   0  -3   5  378.70    0.90
   1  -3   5  183.61    0.93
   2  -3   5  103.80    0.83
   3  -3   5   45.50    1.26
   4  -3   5   16.88    1.59
  -4  -2   5   35.81    1.48
  -2  -2   5   79.61    0.94
  -1  -2   5   55.68    0.41
   0  -2   5  115.30    0.81
   1  -2   5   15.34    0.31
   2  -2   5   71.67    0.69
   3  -2   5  128.05    1.08
   4  -2   5   13.64    1.43
  -4  -1   5   11.75    1.21
  -3  -1   5   10.90    0.87
  -2  -1   5    1.06    0.35
  -1  -1   5  384.15    0.85
   0  -1   5   20.13    0.38
   1  -1   5    7.91    0.25
   2  -1   5    9.39    0.39
   3  -1   5    6.98    0.48
  -4   0   5    0.01    0.50
  -3   0   5    0.77    0.56
  -2   0   5    0.29    0.32
  -1   0   5    0.91    0.22
   0   0   5    0.52    0.17
   1   0   5    0.07    0.15
   2   0   5    0.31    0.25
   3   0   5    1.01    0.38
   4   0   5    4.81    1.18
  -4   1   5   12.07    0.81
  -3   1   5    9.88    0.84
  -2   1   5    0.63    0.33
  -1   1   5  375.66    1.49
   0   1   5   20.83    0.38
   1   1   5   10.15    0.48
   2   1   5    9.06    0.42
   3   1   5    6.67    0.51
  -4   2   5   34.93    0.97
  -3   2   5    0.72    0.55
  -2   2   5   83.54    0.98
  -1   2   5   58.29    0.65
   1   2   5   17.48    0.57
   2   2   5   70.35    0.73
   3   2   5  128.94    1.42
   4   2   5   15.59    1.54
  -4   3   5   66.49    1.12
  -3   3   5   31.14    0.72
  -2   3   5   51.99    0.80
  -1   3   5  106.76    0.86
   1   3   5  182.52    1.37
   2   3   5  101.81    0.89
   3   3   5   42.23    0.82
   4   3   5   20.03    1.73
  -4   4   5   33.48    1.44
  -3   4   5   44.52    0.80
  -2   4   5  126.53    1.14
  -1   4   5  306.38    1.42
   1   4   5   71.49    1.07
   2   4   5   79.07    1.38
   3   4   5  141.44    1.29
   4   4   5   28.69    1.70
  -4   5   5   33.92    1.53
  -3   5   5   54.49    0.85
  -2   5   5  163.10    0.99
  -1   5   5    3.34    0.25
   0   5   5  486.54    1.61
   1   5   5   62.25    1.17
   2   5   5  178.55    1.96
   3   5   5   54.29    0.97
   4   5   5   19.49    1.69
  -4   6   5   17.78    1.47
  -3   6   5   21.38    1.08
  -2   6   5   46.32    0.61
  -1   6   5  155.86    1.10
   1   6   5   62.57    1.30
   2   6   5   89.20    1.67
   3   6   5   66.84    1.14
   4   6   5   14.14    1.70
  -4   7   5    6.56    1.18
  -3   7   5   30.73    1.25
  -2   7   5   74.91    1.26
  -1   7   5   10.64    0.63
   0   7   5  235.55    2.02
   1   7   5    8.17    0.93
   2   7   5   82.01    1.73
   3   7   5   12.63    1.29
   4   7   5    6.91    1.35
  -3   8   5   -0.48    0.79
  -2   8   5   70.74    1.36
  -1   8   5   70.65    1.14
   0   8   5    7.64    0.80
   1   8   5   31.26    1.22
   2   8   5   47.00    1.59
   3   8   5   29.10    1.64
  -3   9   5    5.30    0.99
  -2   9   5   51.61    1.37
  -1   9   5    0.24    0.51
   0   9   5  102.42    1.66
   1   9   5   32.81    1.36
   2   9   5    1.78    1.05
   3   9   5    4.41    1.26
  -3  10   5   -2.36    0.92
  -2  10   5   70.59    1.58
   0  10   5    4.34    0.90
   1  10   5   23.98    1.52
   2  10   5   22.48    1.66
   3  10   5   14.90    1.59
  -3  11   5   26.15    1.73
  -2  11   5   22.78    1.35
   0  11   5   36.78    1.49
   1  11   5    1.13    1.12
   2  11   5   23.54    1.82
  -2  12   5    2.34    1.00
   0  12   5    5.77    1.10
   1  12   5   11.72    1.47
   2  12   5   -1.15    1.39
  -1  13   5    6.22    1.21
   0  13   5    3.61    1.22
   1  13   5   38.87    2.06
   0  14   5    3.92    1.38
  -2 -13   6   17.64    1.32
  -1 -13   6    1.12    0.75
   0 -13   6   21.02    1.42
   1 -13   6  144.79    2.28
   2 -13   6    3.17    0.91
  -2 -12   6  188.91    2.46
  -1 -12   6   56.17    1.56
   0 -12   6   48.95    1.44
   1 -12   6    5.10    0.84
   2 -12   6    5.59    0.75
  -2 -11   6   39.52    1.37
  -1 -11   6    1.51    0.60
   0 -11   6   75.40    1.53
   1 -11   6  374.73    2.94
   2 -11   6   12.33    0.91
   3 -11   6   34.91    1.96
  -3 -10   6   -0.10    0.83
  -2 -10   6  326.65    2.68
  -1 -10   6   51.23    1.25
   0 -10   6   59.39    1.30
   1 -10   6    9.32    0.96
   2 -10   6   13.49    0.86
   3 -10   6   75.08    2.17
  -3  -9   6    7.43    0.95
  -2  -9   6   32.46    0.79
  -1  -9   6   16.96    0.85
   0  -9   6   81.21    1.33
   1  -9   6  258.55    1.65
   2  -9   6   18.74    0.82
   3  -9   6   25.49    1.63
  -3  -8   6   17.06    1.13
  -2  -8   6  156.55    1.63
  -1  -8   6   20.27    0.51
   0  -8   6   12.40    0.76
   1  -8   6    8.55    0.61
   2  -8   6    1.16    0.44
   3  -8   6   61.55    1.87
   4  -8   6    1.47    1.34
  -4  -7   6   25.30    1.53
  -3  -7   6    4.67    0.81
  -2  -7   6   18.90    0.59
  -1  -7   6   40.63    0.58
   0  -7   6   13.96    0.67
   1  -7   6  196.73    1.28
   2  -7   6   28.41    0.74
   3  -7   6   21.75    1.40
   4  -7   6    4.06    1.38
  -4  -6   6   -0.18    0.94
  -3  -6   6   50.81    1.34
  -2  -6   6   36.05    0.63
  -1  -6   6  105.03    0.76
   0  -6   6  294.83    1.80
   1  -6   6    7.03    0.47
   2  -6   6   29.19    0.69
   3  -6   6   51.38    1.53
   4  -6   6    0.97    1.18
  -4  -5   6   51.40    1.69
  -3  -5   6  120.02    1.72
  -2  -5   6   30.08    0.56
  -1  -5   6  272.59    1.16
   0  -5   6   13.25    0.54
   1  -5   6  265.56    1.22
   2  -5   6  119.17    1.00
   3  -5   6   39.46    1.35
   4  -5   6   42.34    1.90
  -4  -4   6    5.78    1.03
  -3  -4   6  230.43    2.22
  -2  -4   6   14.88    0.43
  -1  -4   6   28.82    0.40
   0  -4   6  853.95    3.75
   1  -4   6  118.81    0.78
   2  -4   6  503.32    1.77
   3  -4   6   55.44    0.89
   4  -4   6    3.81    1.21
  -4  -3   6   20.98    1.38
  -3  -3   6  120.89    1.66
  -2  -3   6  107.20    1.34
  -1  -3   6 1657.04    7.90
   0  -3   6  192.53    0.71
   1  -3   6   54.30    0.52
   2  -3   6  206.08    1.12
   3  -3   6    7.41    0.60
   4  -3   6  124.78    2.32
  -4  -2   6   12.70    1.26
  -3  -2   6  265.75    2.26
  -2  -2   6    2.84    0.43
  -1  -2   6   20.38    0.30
   0  -2   6  560.55    1.80
   1  -2   6  239.43    2.09
   2  -2   6  808.95    8.24
   3  -2   6    8.00    0.57
   4  -2   6    3.16    1.03
  -4  -1   6    0.01    0.85
  -3  -1   6   75.64    1.34
  -2  -1   6  143.83    1.33
  -1  -1   6  758.36    2.07
   0  -1   6   93.68    0.72
   1  -1   6   31.49    0.36
   2  -1   6   78.10    0.73
   3  -1   6    0.12    0.38
   4  -1   6  143.25    2.48
  -4   0   6    8.97    0.65
  -3   0   6  122.64    1.58
  -2   0   6   44.62    0.81
  -1   0   6    4.44    0.32
   0   0   6  573.40    2.53
   1   0   6  221.07    2.89
   2   0   6  303.04    3.75
   3   0   6    6.87    0.48
   4   0   6    3.04    1.15
  -4   1   6    1.46    0.55
  -3   1   6   76.46    1.31
  -2   1   6  140.47    1.26
  -1   1   6  774.14    2.82
   0   1   6   95.14    0.71
   1   1   6   31.45    0.38
   2   1   6   76.53    0.78
   3   1   6   -0.01    0.41
   4   1   6  143.00    2.51
  -4   2   6   13.38    0.84
  -3   2   6  265.98    2.12
  -2   2   6    2.39    0.38
  -1   2   6   20.93    0.49
   1   2   6  230.29    2.03
   2   2   6  811.07    2.82
   3   2   6    7.83    0.61
   4   2   6    3.29    1.14
  -4   3   6   20.10    0.90
  -3   3   6  119.99    1.13
  -2   3   6  112.65    1.14
  -1   3   6 1691.36    5.78
   1   3   6   54.42    0.84
   2   3   6  203.84    1.20
   3   3   6    5.33    0.49
   4   3   6  131.04    2.50
  -4   4   6    6.14    0.88
  -3   4   6  226.18    1.46
  -2   4   6   15.80    0.60
  -1   4   6   29.05    0.55
   1   4   6  117.56    1.28
   2   4   6  507.64    2.88
   3   4   6   54.29    0.94
   4   4   6    2.87    1.16
  -4   5   6   56.98    1.74
  -3   5   6  120.65    1.14
  -2   5   6   29.14    0.56
  -1   5   6  278.16    1.48
   1   5   6  269.08    2.04
   2   5   6  117.75    1.69
   3   5   6   35.24    0.88
   4   5   6   42.90    1.95
  -4   6   6    0.71    0.91
  -3   6   6   50.62    1.36
  -2   6   6   36.44    0.60
  -1   6   6  108.14    0.75
   1   6   6    8.26    0.91
   2   6   6   27.04    1.23
   3   6   6   53.82    1.03
   4   6   6    3.21    1.21
  -4   7   6   25.24    1.61
  -3   7   6    4.35    0.80
  -2   7   6   18.39    0.90
  -1   7   6   43.77    0.58
   0   7   6   13.11    0.81
   1   7   6  197.87    2.19
   2   7   6   25.07    1.30
   3   7   6   19.49    1.44
   4   7   6    4.33    1.24
  -3   8   6   17.57    1.26
  -2   8   6  159.26    1.85
  -1   8   6   21.42    0.81
   0   8   6   11.43    0.90
   1   8   6   11.63    1.12
   2   8   6    0.55    0.93
   3   8   6   57.92    1.90
  -3   9   6    6.51    1.02
  -2   9   6   32.62    1.25
  -1   9   6   17.43    0.92
   0   9   6   78.14    1.53
   1   9   6  249.28    2.75
   2   9   6   15.99    1.47
   3   9   6   24.69    1.71
  -3  10   6   -1.71    0.88
  -2  10   6  327.20    2.82
  -1  10   6   54.68    1.28
   0  10   6   58.45    1.55
   1  10   6   10.07    1.24
   2  10   6   14.88    1.51
   3  10   6   75.77    2.22
  -2  11   6   34.35    1.52
  -1  11   6   -1.42    0.69
   0  11   6   68.89    1.73
   1  11   6  348.73    3.56
   2  11   6   10.68    1.49
  -2  12   6  176.47    2.51
   0  12   6   48.06    1.72
   1  12   6    5.25    1.39
   2  12   6    3.66    1.51
  -2  13   6    8.94    1.29
  -1  13   6    2.41    1.10
   0  13   6   14.49    1.49
   1  13   6  125.97    2.70
  -1 -13   7    4.37    0.86
   0 -13   7   75.40    1.78
   1 -13   7   14.94    1.41
  -2 -12   7   25.47    1.34
  -1 -12   7   19.61    1.22
   0 -12   7   19.83    1.23
   1 -12   7   14.01    1.24
   2 -12   7   25.13    1.12
  -2 -11   7   13.41    1.10
   0 -11   7   64.48    1.49
   1 -11   7   55.72    1.47
   2 -11   7   11.48    0.92
   3 -11   7    3.55    1.39
  -2 -10   7   35.61    1.23
  -1 -10   7   51.60    1.25
   0 -10   7   -0.05    0.51
   1 -10   7   58.02    1.36
   2 -10   7    1.01    0.58
   3 -10   7    2.24    1.22
  -3  -9   7   -0.75    0.78
  -2  -9   7   36.70    0.77
  -1  -9   7   10.02    0.82
   0  -9   7    5.03    0.58
   1  -9   7   19.70    0.75
   2  -9   7    0.85    0.51
   3  -9   7   23.17    1.63
  -3  -8   7   18.75    1.17
  -2  -8   7    0.38    0.35
  -1  -8   7   11.61    0.49
   0  -8   7    1.31    0.43
   1  -8   7  167.29    1.29
   2  -8   7    1.61    0.48
   3  -8   7   10.06    1.30
   4  -8   7    1.17    1.39
  -4  -7   7    9.18    1.20
  -3  -7   7    0.22    0.71
  -2  -7   7   98.33    0.92
  -1  -7   7   26.28    0.52
   0  -7   7   83.49    1.18
   1  -7   7    1.30    0.36
   2  -7   7    4.23    0.48
   3  -7   7   48.25    1.64
   4  -7   7   17.30    1.79
  -4  -6   7   39.13    1.62
  -3  -6   7   77.40    1.57
  -2  -6   7   14.69    0.50
  -1  -6   7   15.98    0.43
   0  -6   7   62.67    0.98
   1  -6   7  403.17    1.63
   2  -6   7   23.82    0.66
   3  -6   7    6.31    0.99
   4  -6   7    0.71    1.23
  -4  -5   7   27.96    1.48
  -3  -5   7    0.70    0.68
  -2  -5   7  252.33    1.23
  -1  -5   7  473.33    1.46
   0  -5   7  157.80    1.31
   1  -5   7    1.81    0.28
   2  -5   7   14.85    0.58
   3  -5   7  145.99    1.29
   4  -5   7   27.16    1.76
  -4  -4   7   48.13    1.65
  -3  -4   7  193.85    2.06
  -2  -4   7   27.66    0.49
  -1  -4   7   97.92    0.66
   0  -4   7  753.60    5.48
   1  -4   7  450.40    2.23
   2  -4   7  163.16    1.10
   3  -4   7    1.46    0.43
   4  -4   7    1.99    1.15
  -4  -3   7   25.37    1.47
  -3  -3   7    1.35    0.59
  -2  -3   7  167.89    0.89
  -1  -3   7  782.95    1.87
   0  -3   7   62.95    0.65
   1  -3   7    7.77    0.31
   2  -3   7   56.77    0.71
   3  -3   7  117.30    1.12
   4  -3   7   24.91    1.60
  -4  -2   7   13.69    1.30
  -3  -2   7   57.96    1.25
  -2  -2   7   53.58    0.94
  -1  -2   7    2.31    0.18
   0  -2   7  236.22    1.23
   1  -2   7  141.28    1.85
   2  -2   7   29.44    0.54
   3  -2   7    1.02    0.39
   4  -2   7    2.71    1.04
  -4  -1   7    1.01    0.89
  -3  -1   7    3.07    0.62
  -2  -1   7   11.88    0.60
  -1  -1   7   72.01    0.46
   0  -1   7    3.67    0.35
   1  -1   7    3.57    0.24
   2  -1   7   25.74    0.54
   3  -1   7    7.52    0.50
   4  -1   7   12.93    1.55
  -4   0   7   -0.31    0.51
  -3   0   7    0.12    0.52
  -2   0   7    0.42    0.34
  -1   0   7    0.19    0.12
   0   0   7    0.34    0.19
   1   0   7    0.30    0.15
   2   0   7   -0.25    0.26
   3   0   7   -0.26    0.38
   4   0   7    2.33    1.10
  -4   1   7    1.26    0.56
  -3   1   7    3.65    0.61
  -2   1   7   12.23    0.59
  -1   1   7   74.16    0.44
   0   1   7    3.96    0.32
   1   1   7    3.36    0.26
   2   1   7   22.68    0.53
   3   1   7    7.21    0.53
   4   1   7    7.26    1.21
  -4   2   7   13.72    0.85
  -3   2   7   60.38    1.23
  -2   2   7   54.92    0.90
  -1   2   7    2.10    0.19
   0   2   7  237.51    1.20
   1   2   7  141.85    0.78
   2   2   7   29.19    0.66
   3   2   7    0.40    0.39
   4   2   7    2.31    1.11
  -4   3   7   24.39    0.94
  -3   3   7    1.54    0.56
  -2   3   7  171.10    1.43
  -1   3   7  798.80    2.54
   1   3   7    8.41    0.58
   2   3   7   54.45    0.75
   3   3   7  113.01    1.17
   4   3   7   27.26    1.76
  -4   4   7   50.48    1.60
  -3   4   7  199.83    1.40
  -2   4   7   28.52    0.73
  -1   4   7   98.73    0.96
   1   4   7  449.46    2.30
   2   4   7  155.48    1.15
   3   4   7    1.29    0.45
   4   4   7    2.69    1.16
  -4   5   7   29.07    1.40
  -3   5   7   -0.10    0.40
  -2   5   7  269.54    1.76
  -1   5   7  475.45    2.02
   1   5   7    2.55    0.61
   2   5   7   14.18    1.04
   3   5   7  144.92    1.40
   4   5   7   29.94    1.84
  -4   6   7   41.93    1.65
  -3   6   7   74.10    1.54
  -2   6   7   14.46    0.51
  -1   6   7   15.86    0.54
   0   6   7   56.64    1.02
   1   6   7  415.19    2.72
   2   6   7   24.29    1.19
   3   6   7    4.56    0.57
   4   6   7    1.15    1.20
  -3   7   7    1.71    0.71
  -2   7   7   98.58    1.46
  -1   7   7   29.23    0.55
   0   7   7   83.63    1.34
   1   7   7    1.35    0.79
   2   7   7    3.54    0.91
   3   7   7   48.37    1.10
   4   7   7   17.46    1.65
  -3   8   7   20.03    1.28
  -2   8   7    0.49    0.55
  -1   8   7   12.05    0.71
   0   8   7    1.24    0.64
   1   8   7  166.56    2.18
   2   8   7   -0.29    0.92
   3   8   7    7.33    1.25
  -3   9   7   -0.15    0.91
  -2   9   7   35.51    1.23
  -1   9   7    7.83    0.80
   0   9   7    7.61    0.87
   1   9   7   16.92    1.16
   2   9   7    0.51    1.03
   3   9   7   22.60    1.68
  -3  10   7   -0.85    0.99
  -2  10   7   32.14    1.31
  -1  10   7   52.03    1.23
   0  10   7    0.52    0.84
   1  10   7   55.37    1.77
   2  10   7   -0.45    1.15
   3  10   7    0.84    1.26
  -2  11   7   12.04    1.07
  -1  11   7   -0.99    0.71
   0  11   7   61.26    1.70
   1  11   7   48.76    1.85
   2  11   7   12.73    1.62
  -2  12   7   16.68    1.45
  -1  12   7   22.38    1.32
   0  12   7   16.98    1.43
   1  12   7   12.55    1.47
   2  12   7   21.67    1.97
  -1  13   7    3.85    1.14
   0  13   7   75.22    2.15
   1  13   7   13.34    1.65
  -1 -13   8  114.26    2.12
   0 -13   8    1.38    0.75
   1 -13   8   82.61    1.90
  -2 -12   8   36.39    1.44
  -1 -12   8   40.74    1.42
   0 -12   8   22.86    1.29
   1 -12   8   58.07    1.62
   2 -12   8   44.74    1.37
  -2 -11   8    6.60    0.80
  -1 -11   8  271.10    2.52
   0 -11   8    4.36    0.70
   1 -11   8  261.86    2.57
   2 -11   8    6.26    0.74
   3 -11   8   10.61    1.59
  -2 -10   8   20.93    1.10
  -1 -10   8  122.71    1.71
   0 -10   8    2.56    0.59
   1 -10   8   90.73    1.58
   2 -10   8   43.84    1.08
   3 -10   8   30.43    1.79
  -3  -9   8    3.17    0.87
  -2  -9   8   -0.04    0.37
  -1  -9   8  174.74    1.87
   0  -9   8    0.19    0.46
   1  -9   8  174.16    1.91
   2  -9   8    8.94    0.75
   3  -9   8    2.44    1.23
  -3  -8   8   18.69    1.15
  -2  -8   8    7.62    0.53
  -1  -8   8  129.73    1.52
   0  -8   8   70.53    1.20
   1  -8   8   82.57    1.01
   2  -8   8   17.15    0.78
   3  -8   8   18.83    1.46
   4  -8   8   19.30    1.97
  -4  -7   8   20.63    1.51
  -3  -7   8    2.61    0.77
  -2  -7   8   -0.25    0.31
  -1  -7   8   68.63    0.71
   0  -7   8    0.82    0.41
   1  -7   8   47.65    0.78
   2  -7   8    3.37    0.46
   3  -7   8    5.32    1.04
   4  -7   8   28.66    1.85
  -4  -6   8   -0.72    0.94
  -3  -6   8   91.81    1.61
  -2  -6   8  105.09    0.90
  -1  -6   8   16.04    0.44
   0  -6   8  247.93    1.76
   1  -6   8   52.99    0.74
   2  -6   8   87.03    0.98
   3  -6   8   37.65    0.92
   4  -6   8    1.53    1.22
  -4  -5   8   40.58    1.62
  -3  -5   8   68.03    1.44
  -2  -5   8   49.51    0.65
  -1  -5   8  106.59    0.76
   0  -5   8    7.01    0.28
   1  -5   8  117.54    0.89
   2  -5   8   95.79    0.95
   3  -5   8   49.20    0.94
   4  -5   8   46.83    1.88
  -4  -4   8    8.94    1.13
  -3  -4   8  111.61    1.66
  -2  -4   8  211.20    1.07
  -1  -4   8    4.22    0.30
   0  -4   8 1410.85    3.53
   1  -4   8    1.85    0.26
   2  -4   8  127.62    1.27
   3  -4   8   78.29    1.03
   4  -4   8    8.34    1.30
  -4  -3   8   44.77    1.59
  -3  -3   8  195.78    2.06
  -2  -3   8  471.61    2.75
  -1  -3   8   89.56    0.62
   0  -3   8   16.23    0.35
   1  -3   8  139.02    0.78
   2  -3   8  267.42    1.32
   3  -3   8  188.03    1.35
   4  -3   8   27.83    1.63
  -4  -2   8   25.01    1.42
  -3  -2   8   22.43    1.00
  -2  -2   8   98.35    1.20
  -1  -2   8    6.93    0.27
   0  -2   8 1502.46    5.78
   1  -2   8   55.18    0.57
   2  -2   8   47.43    0.66
   3  -2   8   60.21    1.05
   4  -2   8   16.63    1.47
  -4  -1   8    9.16    1.09
  -3  -1   8   95.92    1.47
  -2  -1   8  471.15    2.39
  -1  -1   8   59.33    0.53
   0  -1   8    0.66    0.23
   1  -1   8  128.90    1.14
   2  -1   8  355.56    1.47
   3  -1   8   92.71    2.13
   4  -1   8    2.14    1.08
  -4   0   8   35.43    1.47
  -3   0   8   12.69    0.88
  -2   0   8   78.01    1.07
  -1   0   8  110.49    0.81
   0   0   8  126.10    0.94
   1   0   8   90.20    0.96
   2   0   8   38.41    1.27
   3   0   8   31.29    0.75
   4   0   8   17.12    1.57
  -4   1   8    9.98    0.72
  -3   1   8  100.40    1.48
  -2   1   8  472.37    2.36
  -1   1   8   59.09    0.44
   0   1   8    0.59    0.22
   1   1   8  122.91    0.93
   2   1   8  346.48    2.50
   3   1   8   89.09    1.83
   4   1   8    2.20    1.12
  -4   2   8   25.70    0.94
  -3   2   8   23.34    0.97
  -2   2   8  101.05    1.19
  -1   2   8    7.19    0.25
   0   2   8 1480.22    5.24
   1   2   8   57.20    0.55
   2   2   8   45.61    0.92
   3   2   8   56.68    0.90
   4   2   8   16.10    1.64
  -4   3   8   44.83    1.09
  -3   3   8  203.10    1.98
  -2   3   8  495.37    2.42
  -1   3   8   91.45    0.97
   1   3   8  142.39    2.59
   2   3   8  260.14    1.38
   3   3   8  191.50    2.04
   4   3   8   31.37    1.80
  -4   4   8    9.37    1.04
  -3   4   8  116.63    1.57
  -2   4   8  225.46    1.68
  -1   4   8    4.02    0.42
   1   4   8    2.20    0.53
   2   4   8  124.74    1.07
   3   4   8   76.70    1.06
   4   4   8    7.65    1.27
  -4   5   8   45.95    1.65
  -3   5   8   72.05    0.99
  -2   5   8   52.89    0.94
  -1   5   8  107.47    1.09
   1   5   8  116.28    1.41
   2   5   8   91.93    1.52
   3   5   8   49.19    0.98
   4   5   8   52.38    2.02
  -4   6   8    0.71    0.87
  -3   6   8   97.03    1.73
  -2   6   8  109.76    1.77
  -1   6   8   15.99    0.59
   0   6   8  246.10    1.86
   1   6   8   55.52    1.27
   2   6   8   85.02    1.59
   3   6   8   38.50    0.98
   4   6   8    3.07    1.18
  -3   7   8    2.53    0.77
  -2   7   8    0.35    0.57
  -1   7   8   71.12    0.73
   0   7   8   -0.18    0.57
   1   7   8   50.02    1.36
   2   7   8    2.99    0.90
   3   7   8    5.44    0.62
   4   7   8   35.72    1.84
  -3   8   8   21.66    1.28
  -2   8   8    8.47    0.79
  -1   8   8  129.79    1.44
   0   8   8   69.98    1.38
   1   8   8   84.33    1.71
   2   8   8   15.89    1.34
   3   8   8   20.02    0.96
  -3   9   8    4.03    0.94
  -2   9   8   -0.37    0.64
  -1   9   8  179.15    1.76
   0   9   8   -0.09    0.71
   1   9   8  171.18    2.37
   2   9   8    8.37    1.21
   3   9   8    1.08    1.19
  -3  10   8   50.25    1.80
  -2  10   8   17.93    1.22
  -1  10   8  129.74    1.72
   0  10   8    3.07    0.89
   1  10   8   91.55    2.04
   2  10   8   43.45    1.86
   3  10   8   32.72    1.89
  -2  11   8    4.15    0.88
   0  11   8    3.15    0.99
   1  11   8  251.79    3.09
   2  11   8    6.31    1.44
  -2  12   8   29.73    1.59
  -1  12   8   43.42    1.54
   0  12   8   18.54    1.45
   1  12   8   50.30    1.96
   2  12   8   44.90    2.16
  -1  13   8  122.28    2.45
   0  13   8    0.11    1.15
   1  13   8   75.75    2.31
  -1 -13   9   21.46    1.36
   0 -13   9   38.95    1.53
   1 -13   9    4.34    0.88
  -2 -12   9   22.91    1.33
  -1 -12   9   10.36    1.17
   0 -12   9    8.21    0.88
   1 -12   9   28.00    1.36
   2 -12   9   19.11    1.40
  -2 -11   9    2.70    0.69
  -1 -11   9   16.37    1.08
   0 -11   9   44.69    1.36
   1 -11   9    4.37    0.75
   2 -11   9    5.31    0.71
  -2 -10   9    0.55    0.58
  -1 -10   9   88.07    1.54
   0 -10   9    0.38    0.53
   1 -10   9    6.14    0.73
   2 -10   9   53.27    1.14
   3 -10   9    0.21    1.22
  -3  -9   9   15.88    1.23
  -2  -9   9    9.56    0.89
  -1  -9   9    1.69    0.50
   0  -9   9    2.11    0.52
   1  -9   9   46.80    1.27
   2  -9   9   39.79    0.99
   3  -9   9   -0.49    1.17
  -3  -8   9    0.15    0.80
  -2  -8   9   -0.11    0.35
  -1  -8   9  250.28    2.05
   0  -8   9    3.11    0.50
   1  -8   9    0.23    0.40
   2  -8   9    5.06    0.54
   3  -8   9   20.54    1.51
  -3  -7   9   75.21    1.61
  -2  -7   9   11.21    0.55
  -1  -7   9    0.23    0.27
   0  -7   9   76.92    1.20
   1  -7   9   19.64    0.64
   2  -7   9  161.38    1.34
   3  -7   9    0.35    0.51
  -4  -6   9   -2.34    0.96
  -3  -6   9    4.35    0.81
  -2  -6   9    3.04    0.33
  -1  -6   9  339.45    1.37
   0  -6   9  149.56    1.45
   1  -6   9    6.28    0.50
   2  -6   9   12.31    0.64
   3  -6   9   41.01    0.95
   4  -6   9   30.80    1.75
  -4  -5   9   13.95    1.41
  -3  -5   9  176.27    2.05
  -2  -5   9   50.03    0.66
  -1  -5   9    8.26    0.38
   0  -5   9   22.35    0.39
   1  -5   9  202.33    1.14
   2  -5   9  203.39    1.51
   3  -5   9    7.73    0.58
   4  -5   9   20.22    1.56
  -4  -4   9   -1.10    0.90
  -3  -4   9    1.73    0.66
  -2  -4   9  114.54    0.83
  -1  -4   9  208.71    1.15
   0  -4   9  578.82    1.48
   1  -4   9    9.59    0.41
   2  -4   9    5.59    0.44
   3  -4   9   86.64    1.06
   4  -4   9   38.93    1.73
  -4  -3   9   30.00    1.51
  -3  -3   9   86.69    1.50
  -2  -3   9    6.23    0.35
  -1  -3   9    3.63    0.25
   0  -3   9    9.26    0.29
   1  -3   9  610.21    5.83
   2  -3   9   68.69    0.78
   3  -3   9    0.82    0.43
   4  -3   9   13.95    1.50
  -4  -2   9   -0.98    0.84
  -3  -2   9    0.57    0.57
  -2  -2   9   99.14    1.25
  -1  -2   9   60.98    0.53
   0  -2   9   20.69    0.55
   1  -2   9   22.60    0.66
   2  -2   9    0.27    0.29
   3  -2   9   91.28    1.32
   4  -2   9   19.91    1.44
  -4  -1   9    7.28    1.02
  -3  -1   9    3.50    0.65
  -2  -1   9   16.06    0.69
  -1  -1   9   15.89    0.33
   0  -1   9   36.43    0.66
   1  -1   9  108.84    1.11
   2  -1   9    3.78    0.33
   3  -1   9    6.53    0.54
   4  -1   9    2.28    0.96
  -4   0   9   -0.63    0.88
  -3   0   9    0.18    0.54
  -2   0   9    0.34    0.37
  -1   0   9    0.21    0.16
   0   0   9    0.02    0.22
   1   0   9    0.11    0.27
   2   0   9   -0.17    0.28
   3   0   9   -0.13    0.41
   4   0   9    2.79    1.02
  -4   1   9    7.40    1.04
  -3   1   9    4.12    0.66
  -2   1   9   16.53    0.69
  -1   1   9   15.99    0.32
   0   1   9   32.63    0.58
   1   1   9  109.47    1.11
   2   1   9    3.92    0.35
   3   1   9    6.00    0.50
   4   1   9    1.46    1.08
  -4   2   9   -0.03    0.58
  -3   2   9    0.54    0.57
  -2   2   9   99.01    1.21
  -1   2   9   61.07    0.50
   0   2   9   20.81    0.53
   1   2   9   22.03    0.42
   2   2   9   -0.60    0.30
   3   2   9   87.52    1.17
   4   2   9   18.74    1.59
  -4   3   9   30.00    1.01
  -3   3   9   91.81    1.47
  -2   3   9    7.18    0.63
  -1   3   9    3.63    0.25
   0   3   9    9.81    0.47
   1   3   9  621.74   10.40
   2   3   9   65.07    0.81
   3   3   9    1.68    0.46
   4   3   9   14.90    1.63
  -4   4   9   -0.76    0.59
  -3   4   9    1.65    0.60
  -2   4   9  123.04    1.36
  -1   4   9  210.61    1.52
   1   4   9   10.16    0.69
   2   4   9    5.91    0.46
   3   4   9   86.85    1.13
   4   4   9   41.47    1.79
  -4   5   9   16.99    1.37
  -3   5   9  181.23    1.49
  -2   5   9   56.64    1.02
  -1   5   9    8.35    0.54
   0   5   9   21.55    0.70
   1   5   9  208.13    1.80
   2   5   9  201.32    1.38
   3   5   9    7.31    0.60
   4   5   9   26.13    1.79
  -4   6   9   -0.62    0.84
  -3   6   9    6.26    0.82
  -2   6   9    4.03    0.51
   0   6   9  153.07    1.57
   1   6   9    8.70    0.86
   2   6   9   10.63    1.04
   3   6   9   41.41    1.01
   4   6   9   36.15    1.75
  -3   7   9   74.27    1.69
  -2   7   9   10.95    0.89
   0   7   9   78.62    1.33
   1   7   9   19.56    1.11
   2   7   9  161.13    2.16
   3   7   9    0.15    0.55
   4   7   9    7.84    1.32
  -3   8   9    1.18    0.78
  -2   8   9    0.32    0.62
  -1   8   9  257.17    1.99
   0   8   9    3.48    0.72
   1   8   9    0.51    0.80
   2   8   9    5.33    1.06
   3   8   9   20.66    0.97
  -3   9   9   17.53    1.35
  -2   9   9    9.52    0.84
  -1   9   9    0.85    0.49
   0   9   9    2.45    0.79
   1   9   9   44.31    1.56
   2   9   9   36.26    1.65
   3   9   9    0.07    0.63
  -3  10   9   12.25    1.49
  -2  10   9   -1.48    0.68
  -1  10   9   89.31    1.47
   0  10   9   -0.12    0.79
   1  10   9    6.72    1.12
   2  10   9   50.74    1.92
   3  10   9    0.31    1.23
  -2  11   9    0.56    0.88
   0  11   9   44.65    1.58
   1  11   9    4.24    1.20
   2  11   9    5.30    1.42
  -2  12   9   13.90    1.43
  -1  12   9   13.42    1.28
   0  12   9    8.49    1.22
   1  12   9   23.19    1.74
   2  12   9   19.65    1.82
  -1  13   9   25.76    1.68
   0  13   9   39.78    1.86
   1  13   9    2.85    1.37
  -1 -13  10   91.54    1.95
   0 -13  10    3.66    0.83
  -2 -12  10    6.73    0.86
  -1 -12  10    2.26    0.70
   0 -12  10   37.38    1.44
   1 -12  10   18.44    1.29
   2 -12  10   88.34    1.97
  -2 -11  10   21.42    1.24
  -1 -11  10  208.97    2.33
   0 -11  10   27.72    1.25
   1 -11  10    5.20    0.76
   2 -11  10   18.79    1.01
  -2 -10  10   20.89    1.10
  -1 -10  10    1.87    0.58
   0 -10  10   51.21    1.34
   1 -10  10    9.86    1.03
   2 -10  10  250.01    2.03
  -3  -9  10   28.92    1.34
  -2  -9  10   27.03    1.04
  -1  -9  10  193.06    2.00
   0  -9  10  125.85    1.67
   1  -9  10    9.81    0.96
   2  -9  10   28.10    0.96
  -3  -8  10   72.82    1.62
  -2  -8  10   -0.54    0.35
  -1  -8  10    8.57    0.78
   0  -8  10   72.85    1.29
   1  -8  10   43.05    1.16
   2  -8  10  191.16    2.89
   3  -8  10    6.21    0.68
  -3  -7  10   38.62    1.31
  -2  -7  10   68.17    0.84
  -1  -7  10  178.55    1.10
   0  -7  10   43.94    1.03
   1  -7  10   32.46    0.73
   2  -7  10   36.97    0.87
   3  -7  10    5.21    0.64
  -4  -6  10   -2.24    0.93
  -3  -6  10   39.56    1.27
  -2  -6  10   43.38    0.68
  -1  -6  10   19.22    0.49
   0  -6  10  281.94    1.12
   1  -6  10   47.97    0.74
   2  -6  10   51.73    0.86
   3  -6  10   32.35    0.92
  -4  -5  10   18.85    1.48
  -3  -5  10   17.95    1.06
  -2  -5  10  183.23    1.11
  -1  -5  10  147.34    0.92
   0  -5  10    5.40    0.31
   1  -5  10  106.84    0.89
   2  -5  10   28.15    0.67
   3  -5  10   43.62    0.93
  -4  -4  10   -1.48    0.91
  -3  -4  10   35.12    1.19
  -2  -4  10  327.40    1.41
  -1  -4  10   48.09    0.57
   0  -4  10  309.63    2.50
   1  -4  10   26.30    0.51
   2  -4  10    4.39    0.40
   3  -4  10   80.82    1.06
  -4  -3  10  142.29    2.33
  -3  -3  10   -0.48    0.61
  -2  -3  10   47.73    1.00
  -1  -3  10   25.22    0.45
   0  -3  10   29.79    0.44
   1  -3  10  925.05    3.25
   2  -3  10   22.30    0.57
   3  -3  10   43.14    0.87
   4  -3  10   15.88    1.68
  -4  -2  10    0.21    0.90
  -3  -2  10   13.96    0.96
  -2  -2  10  640.35    2.95
  -1  -2  10  491.02    3.79
   0  -2  10  193.54    1.33
   1  -2  10    1.84    0.37
   2  -2  10    5.38    0.39
   3  -2  10  178.17    1.38
   4  -2  10   21.61    1.44
  -4  -1  10  197.70    2.57
  -3  -1  10    4.88    0.69
  -2  -1  10   35.20    0.88
  -1  -1  10    9.81    0.33
   0  -1  10  373.65    1.83
   1  -1  10 1072.69    4.42
   2  -1  10   31.51    0.58
   3  -1  10   64.71    1.20
   4  -1  10    3.94    1.01
  -4   0  10    8.39    1.06
  -3   0  10    0.01    0.57
  -2   0  10  495.57    2.60
  -1   0  10  611.34    3.71
   0   0  10  342.63    1.67
   1   0  10   37.27    0.77
   2   0  10   11.74    0.46
   3   0  10  253.88    1.59
   4   0  10   15.90    1.44
  -4   1  10  200.41    2.51
  -3   1  10    5.62    0.71
  -2   1  10   34.95    0.86
  -1   1  10    9.53    0.32
   0   1  10  344.04    1.66
   1   1  10 1081.49    3.37
   2   1  10   32.08    0.58
   3   1  10   62.64    0.95
   4   1  10    4.43    1.15
  -4   2  10    0.19    0.87
  -3   2  10   15.70    0.96
  -2   2  10  656.02    3.00
  -1   2  10  495.59    1.37
   0   2  10  196.37    1.30
   1   2  10    0.62    0.31
   2   2  10    5.39    0.40
   3   2  10  173.35    2.96
   4   2  10   23.28    1.57
  -4   3  10  142.71    1.59
  -3   3  10    0.78    0.58
  -2   3  10   49.87    1.01
  -1   3  10   24.93    0.42
   0   3  10   32.79    0.67
   1   3  10  919.40    3.26
   2   3  10   22.04    0.60
   3   3  10   42.18    0.90
   4   3  10   16.91    1.49
  -4   4  10    0.41    0.62
  -3   4  10   37.41    1.13
  -2   4  10  346.99    2.23
  -1   4  10   48.23    0.87
   0   4  10  322.20    1.72
   1   4  10   25.90    0.56
   2   4  10    3.65    0.43
   3   4  10   80.33    1.10
   4   4  10    7.98    1.21
  -4   5  10   23.92    1.48
  -3   5  10   22.40    1.02
  -2   5  10  195.74    1.73
   0   5  10    5.31    0.61
   1   5  10  105.89    1.38
   2   5  10   27.38    0.74
   3   5  10   44.64    0.97
   4   5  10   35.60    1.72
  -3   6  10   41.22    1.39
  -2   6  10   47.62    1.01
   0   6  10  295.17    2.09
   1   6  10   51.08    1.22
   2   6  10   49.78    0.89
   3   6  10   30.98    0.95
   4   6  10    3.71    1.16
  -3   7  10   41.92    1.48
  -2   7  10   67.90    1.33
   0   7  10   43.25    1.10
   1   7  10   34.67    1.22
   2   7  10   36.60    1.41
   3   7  10    4.79    0.65
   4   7  10   44.68    1.91
  -3   8  10   75.81    1.82
  -2   8  10    0.15    0.63
  -1   8  10    8.32    0.49
   0   8  10   71.16    1.41
   1   8  10   42.47    1.40
   2   8  10  192.06    2.45
   3   8  10    6.13    0.73
  -3   9  10   31.12    1.49
  -2   9  10   23.50    1.15
  -1   9  10  198.21    1.89
   0   9  10  129.07    1.91
   1   9  10   10.68    1.14
   2   9  10   26.38    1.53
   3   9  10    0.44    0.64
  -3  10  10   69.52    1.94
  -2  10  10   18.21    1.18
  -1  10  10    1.23    0.61
   0  10  10   51.02    1.50
   1  10  10   12.52    1.28
   2  10  10  246.90    3.08
   3  10  10    0.63    0.68
  -2  11  10   16.66    1.34
   0  11  10   26.33    1.40
   1  11  10    4.45    1.23
   2  11  10   16.61    1.74
  -2  12  10    2.53    1.00
  -1  12  10    6.55    1.08
   0  12  10   35.46    1.66
   1  12  10   15.84    1.67
   2  12  10   80.10    2.42
  -1  13  10   94.91    2.25
   0  13  10    3.78    1.27
   1  13  10   -1.99    1.25
   0 -13  11    0.99    0.80
  -2 -12  11   -0.34    0.69
  -1 -12  11    4.36    0.77
   0 -12  11    1.67    0.73
   1 -12  11   27.60    1.38
  -2 -11  11   23.89    1.24
  -1 -11  11    0.79    0.61
   0 -11  11   18.33    1.18
   1 -11  11    1.99    0.72
   2 -11  11    8.02    0.93
  -2 -10  11   13.96    1.04
  -1 -10  11    0.36    0.54
   0 -10  11    9.98    1.00
   1 -10  11    0.51    0.64
   2 -10  11   69.40    1.74
  -3  -9  11   -1.25    0.82
  -2  -9  11    7.40    0.90
  -1  -9  11   31.51    1.11
   0  -9  11  148.70    1.83
   1  -9  11    4.82    0.69
   2  -9  11   20.60    1.23
   3  -9  11    3.76    0.86
  -3  -8  11   51.38    1.53
  -2  -8  11   55.59    0.84
  -1  -8  11   19.56    0.94
   0  -8  11    0.79    0.49
   1  -8  11   62.81    1.32
   2  -8  11   94.36    1.20
   3  -8  11   11.87    1.29
  -3  -7  11    4.89    0.89
  -2  -7  11   79.38    0.90
  -1  -7  11    5.25    0.44
   0  -7  11  380.56    2.45
   1  -7  11    1.47    0.50
   2  -7  11   51.23    0.94
   3  -7  11   14.12    1.21
  -3  -6  11   70.63    1.56
  -2  -6  11  124.32    1.03
  -1  -6  11   29.27    0.56
   0  -6  11   72.52    0.66
   1  -6  11  129.73    1.07
   2  -6  11   33.53    0.78
   3  -6  11   27.99    1.31
  -4  -5  11   22.94    1.49
  -3  -5  11   21.54    1.10
  -2  -5  11   95.80    0.87
  -1  -5  11   40.91    0.59
   0  -5  11  208.18    1.01
   1  -5  11    6.14    0.49
   2  -5  11   51.35    0.81
   3  -5  11   19.30    1.14
  -4  -4  11   11.78    1.41
  -3  -4  11  102.95    1.69
  -2  -4  11   60.34    1.14
  -1  -4  11    3.81    0.29
   0  -4  11  110.96    0.89
   1  -4  11   39.69    0.91
   2  -4  11   52.63    0.77
   3  -4  11   10.23    0.72
  -4  -3  11    4.58    1.06
  -3  -3  11   16.46    1.03
  -2  -3  11   32.22    0.91
  -1  -3  11  189.73    0.98
   0  -3  11   64.16    1.41
   1  -3  11   45.85    0.94
   2  -3  11   10.19    0.52
   3  -3  11    6.51    0.55
  -4  -2  11    8.83    1.14
  -3  -2  11   99.72    1.62
  -2  -2  11   15.72    0.75
  -1  -2  11   59.22    0.59
   0  -2  11   38.36    0.75
   1  -2  11   47.41    0.93
   2  -2  11   36.75    0.64
   3  -2  11    0.40    0.43
  -4  -1  11    3.59    1.01
  -3  -1  11    1.70    0.67
  -2  -1  11   17.17    0.75
  -1  -1  11   40.30    0.51
   0  -1  11   16.75    0.61
   1  -1  11  134.14    1.32
   2  -1  11    0.61    0.29
   3  -1  11    1.44    0.45
  -4   0  11   -0.35    0.87
  -3   0  11    0.10    0.62
  -2   0  11    0.21    0.40
  -1   0  11    0.40    0.20
   0   0  11    0.31    0.27
   1   0  11   -0.11    0.32
   2   0  11    0.03    0.30
   3   0  11    0.75    0.44
  -4   1  11    2.27    0.93
  -3   1  11    1.65    0.63
  -2   1  11   16.69    0.76
  -1   1  11   38.99    0.49
   0   1  11   15.16    0.54
   1   1  11  134.44    1.31
   2   1  11    0.39    0.30
   3   1  11    1.29    0.45
  -4   2  11    9.00    1.11
  -3   2  11  101.31    1.60
  -2   2  11   17.27    0.78
  -1   2  11   59.13    0.57
   0   2  11   36.80    0.71
   1   2  11   46.82    0.90
   2   2  11   35.44    0.64
   3   2  11    0.07    0.43
  -4   3  11    5.69    0.70
  -3   3  11   16.26    0.98
  -2   3  11   34.28    0.92
  -1   3  11  188.68    0.96
   0   3  11   67.34    0.91
   1   3  11   44.11    0.60
   2   3  11   10.47    0.55
   3   3  11    7.10    0.58
  -4   4  11   15.88    0.96
  -3   4  11  110.70    1.65
  -2   4  11   64.58    1.15
  -1   4  11    3.18    0.27
   0   4  11  114.68    0.81
   1   4  11   38.70    0.62
   2   4  11   52.33    0.82
   3   4  11   12.49    0.74
  -4   5  11   29.48    1.57
  -3   5  11   23.64    1.05
  -2   5  11  104.35    1.40
   0   5  11  218.85    1.66
   1   5  11    7.05    0.53
   2   5  11   51.21    0.86
   3   5  11   19.11    0.83
  -3   6  11   73.58    1.71
  -2   6  11  134.47    1.55
   0   6  11   73.31    1.18
   1   6  11  126.56    1.61
   2   6  11   31.84    0.82
   3   6  11   29.09    0.94
  -3   7  11    7.29    0.94
  -2   7  11   91.73    1.41
   0   7  11  383.08    2.56
   1   7  11    0.66    0.74
   2   7  11   51.57    0.99
   3   7  11   13.08    0.91
  -3   8  11   55.49    1.68
  -2   8  11   57.32    1.39
  -1   8  11   18.79    0.87
   0   8  11    1.17    0.67
   1   8  11   67.72    1.59
   2   8  11   96.31    1.91
   3   8  11   11.89    0.92
  -3   9  11    1.46    0.87
  -2   9  11    5.74    0.81
  -1   9  11   29.65    1.01
   0   9  11  151.93    2.01
   1   9  11    5.47    1.03
   2   9  11   16.74    1.43
   3   9  11    3.76    0.73
  -2  10  11   11.83    1.13
  -1  10  11    0.03    0.59
   0  10  11   10.47    1.15
   1  10  11   -0.54    0.98
   2  10  11   68.88    2.01
   3  10  11   -0.85    1.19
  -2  11  11   18.38    1.35
   0  11  11   18.73    1.33
   1  11  11    0.20    1.09
   2  11  11    7.36    1.44
  -1  12  11    7.12    1.10
   0  12  11    0.68    1.07
   1  12  11   22.43    1.72
   2  12  11   -0.50    1.33
  -1  13  11   28.57    1.69
   0  13  11   -0.36    1.11
   1  13  11    0.07    1.26
  -2 -12  12    4.16    0.80
  -1 -12  12    2.66    0.73
   0 -12  12  132.32    2.14
   1 -12  12    1.36    0.77
  -2 -11  12   48.13    1.44
  -1 -11  12    3.88    0.74
   0 -11  12    0.32    0.66
   1 -11  12    1.73    0.74
   2 -11  12   34.12    1.49
  -2 -10  12   15.52    1.08
  -1 -10  12    1.09    0.60
   0 -10  12  223.90    2.37
   1 -10  12   24.29    1.26
   2 -10  12   15.28    1.28
  -3  -9  12   42.12    1.48
  -2  -9  12  125.86    1.72
  -1  -9  12    4.59    0.65
   0  -9  12    1.17    0.58
   1  -9  12    9.72    1.00
   2  -9  12   91.14    1.80
   3  -9  12   77.48    1.87
  -3  -8  12   21.84    1.25
  -2  -8  12   64.10    0.90
  -1  -8  12    5.94    0.61
   0  -8  12  314.80    2.45
   1  -8  12   25.93    1.11
   2  -8  12   42.79    1.36
   3  -8  12   12.78    1.27
  -3  -7  12   39.03    1.38
  -2  -7  12   93.27    1.12
  -1  -7  12   34.92    0.63
   0  -7  12    0.58    0.45
   1  -7  12  142.38    1.74
   2  -7  12  151.90    1.95
   3  -7  12   49.40    1.53
  -3  -6  12   23.76    1.19
  -2  -6  12  127.37    1.09
  -1  -6  12   20.93    0.53
   0  -6  12  206.24    1.12
   1  -6  12   12.58    0.87
   2  -6  12    4.43    0.66
   3  -6  12    9.48    1.18
  -4  -5  12   31.83    1.67
  -3  -5  12    3.77    0.80
  -2  -5  12   12.11    0.81
  -1  -5  12   69.05    0.73
   0  -5  12    0.32    0.25
   1  -5  12  308.02    1.44
   2  -5  12   62.24    1.31
   3  -5  12    4.43    0.77
  -4  -4  12   12.22    1.40
  -3  -4  12   57.07    1.40
  -2  -4  12   53.03    1.10
  -1  -4  12   50.10    0.64
   0  -4  12   22.21    0.47
   1  -4  12   53.47    1.07
   2  -4  12   24.04    1.01
   3  -4  12   18.24    1.16
  -4  -3  12   22.90    1.49
  -3  -3  12    7.93    0.85
  -2  -3  12   12.18    0.75
  -1  -3  12  552.53    5.95
   0  -3  12    3.74    0.28
   1  -3  12  168.59    1.59
   2  -3  12    0.36    0.34
   3  -3  12    2.74    0.69
  -4  -2  12   58.91    1.79
  -3  -2  12  157.68    2.00
  -2  -2  12   44.56    1.01
  -1  -2  12  115.02    0.85
   0  -2  12    0.63    0.34
   1  -2  12  174.92    1.58
   2  -2  12  264.05    2.37
   3  -2  12  101.44    1.74
  -4  -1  12  112.73    2.16
  -3  -1  12    4.46    0.73
  -2  -1  12    1.60    0.49
  -1  -1  12 1281.22    2.52
   0  -1  12    3.98    0.40
   1  -1  12  420.71    2.31
   2  -1  12   27.31    0.58
   3  -1  12   13.30    1.15
  -4   0  12   85.57    1.97
  -3   0  12  210.58    2.22
  -2   0  12  113.66    1.42
  -1   0  12  432.54    1.42
   0   0  12    7.38    0.53
   1   0  12  493.82    2.48
   2   0  12  411.04    5.65
   3   0  12  186.14    2.13
  -4   1  12  111.84    2.13
  -3   1  12    3.95    0.70
  -2   1  12    0.91    0.45
  -1   1  12 1274.27    2.40
   0   1  12    3.73    0.37
   1   1  12  425.19    2.32
   2   1  12   29.49    0.60
   3   1  12   15.25    0.72
  -4   2  12   59.75    1.74
  -3   2  12  161.99    1.98
  -2   2  12   47.52    1.04
  -1   2  12  115.88    0.96
   0   2  12    0.66    0.31
   1   2  12  182.23    1.62
   2   2  12  257.55    2.14
   3   2  12   97.35    1.15
  -4   3  12   23.11    1.42
  -3   3  12    9.25    0.86
  -2   3  12   13.19    0.77
  -1   3  12  548.59    1.66
   0   3  12    3.06    0.40
   1   3  12  169.70    1.59
   2   3  12    0.59    0.35
   3   3  12    2.96    0.49
  -4   4  12   16.18    0.97
  -3   4  12   62.19    1.39
  -2   4  12   58.63    1.15
  -1   4  12   52.15    0.65
   0   4  12   23.24    0.49
   1   4  12   55.08    0.74
   2   4  12   22.52    0.66
   3   4  12   18.36    0.80
  -3   5  12    4.72    0.75
  -2   5  12   12.76    0.79
  -1   5  12   71.87    0.98
   0   5  12   -0.05    0.45
   1   5  12  304.75    2.24
   2   5  12   60.38    0.92
   3   5  12    5.34    0.58
  -2   6  12  143.82    1.67
   0   6  12  210.47    1.80
   1   6  12   13.90    0.92
   2   6  12    4.21    0.52
   3   6  12    9.35    0.71
  -3   7  12   43.60    1.54
  -2   7  12  103.86    1.49
   0   7  12    1.58    0.61
   1   7  12  144.31    1.84
   2   7  12  147.23    1.40
   3   7  12   46.77    1.14
  -3   8  12   30.03    1.48
  -2   8  12   67.25    1.49
   0   8  12  313.80    2.54
   1   8  12   26.33    1.28
   2   8  12   42.19    1.03
   3   8  12   11.49    0.96
  -3   9  12   46.31    1.69
  -2   9  12  128.09    1.95
  -1   9  12    3.13    0.64
   0   9  12    0.42    0.74
   1   9  12   12.59    1.20
   2   9  12   85.97    1.98
   3   9  12   78.61    1.44
  -2  10  12   13.56    1.12
   0  10  12  226.90    2.55
   1  10  12   21.36    1.48
   2  10  12   14.84    1.46
  -2  11  12   43.10    1.53
  -1  11  12    9.31    1.07
   0  11  12   -0.34    0.91
   1  11  12   -1.57    1.06
   2  11  12   28.07    1.78
  -1  12  12    4.93    1.04
   0  12  12  136.78    2.45
   1  12  12   -0.92    1.20
   2  12  12    1.34    1.39
   0  13  12   -1.63    1.09
   1  13  12   -2.54    1.22
  -1 -12  13    7.71    0.87
   0 -12  13    6.50    0.89
   1 -12  13    8.64    0.97
  -1 -11  13    0.60    0.64
   0 -11  13    9.07    0.92
   1 -11  13    9.23    1.14
   2 -11  13    0.79    0.81
  -1 -10  13    2.23    0.65
   0 -10  13   13.18    1.11
   1 -10  13    7.79    0.88
   2 -10  13    0.97    0.78
  -1  -9  13    8.71    0.95
   0  -9  13   80.44    1.57
   1  -9  13    0.65    0.64
   2  -9  13    5.18    0.82
   3  -9  13   43.72    1.57
  -3  -8  13   11.82    1.22
  -2  -8  13   43.88    1.18
  -1  -8  13   26.65    1.01
   0  -8  13   50.25    1.27
   1  -8  13   54.67    1.35
   2  -8  13   17.77    1.19
   3  -8  13   33.19    1.50
  -3  -7  13   11.30    1.05
  -2  -7  13   93.39    1.44
  -1  -7  13    7.76    0.60
   0  -7  13  212.39    1.99
   1  -7  13   52.90    1.25
   2  -7  13   34.61    1.31
   3  -7  13   46.86    1.57
  -3  -6  13    0.52    0.76
  -2  -6  13   92.24    1.43
  -1  -6  13  124.67    0.98
   0  -6  13   58.80    0.83
   1  -6  13   52.23    1.19
   2  -6  13   50.68    1.37
   3  -6  13   53.10    1.55
  -3  -5  13   18.55    1.14
  -2  -5  13   96.63    1.44
  -1  -5  13    9.45    0.47
   0  -5  13   84.82    0.93
   1  -5  13  112.67    1.49
   2  -5  13   32.61    1.18
   3  -5  13   14.28    1.22
  -4  -4  13    0.72    1.01
  -3  -4  13   11.04    1.05
  -2  -4  13   73.04    1.27
  -1  -4  13   35.59    0.61
   0  -4  13  123.94    0.90
   1  -4  13    6.17    0.75
   2  -4  13   20.33    1.04
   3  -4  13   41.12    1.39
  -4  -3  13    3.52    1.04
  -3  -3  13    7.82    0.84
  -2  -3  13  127.80    1.55
  -1  -3  13    9.82    0.45
   0  -3  13    9.80    0.41
   1  -3  13  110.03    1.41
   2  -3  13   16.01    0.94
   3  -3  13    4.88    0.77
  -4  -2  13   -1.43    0.92
  -3  -2  13    0.08    0.67
  -2  -2  13   35.84    0.97
  -1  -2  13   43.01    0.61
   0  -2  13   62.05    1.00
   1  -2  13   11.09    0.76
   2  -2  13   48.45    1.20
   3  -2  13   11.23    1.13
  -4  -1  13    1.63    0.97
  -3  -1  13    0.20    0.66
  -2  -1  13   50.50    1.09
  -1  -1  13   44.91    0.60
   0  -1  13    6.71    0.63
   1  -1  13   39.61    0.95
   2  -1  13    6.62    0.66
   3  -1  13    0.02    0.67
  -4   0  13   -1.40    0.88
  -3   0  13    1.04    0.67
  -2   0  13    0.77    0.47
  -1   0  13    0.13    0.24
   0   0  13   -0.03    0.33
   1   0  13    0.17    0.39
   2   0  13    0.07    0.51
   3   0  13   -0.70    0.60
  -4   1  13    2.94    0.97
  -3   1  13    0.51    0.65
  -2   1  13   52.69    1.12
  -1   1  13   44.16    0.58
   0   1  13    6.58    0.56
   1   1  13   37.49    0.90
   2   1  13    6.48    0.65
   3   1  13   -0.65    0.64
  -4   2  13   -1.33    0.89
  -3   2  13    0.83    0.69
  -2   2  13   37.53    1.01
  -1   2  13   42.73    0.58
   0   2  13   60.11    0.94
   1   2  13   11.24    0.71
   2   2  13   48.20    1.17
   3   2  13   11.54    1.14
  -4   3  13    5.04    1.03
  -3   3  13    8.85    0.97
  -2   3  13  136.49    1.63
  -1   3  13    9.92    0.43
   0   3  13   10.50    0.63
   1   3  13  111.25    1.39
   2   3  13   16.33    0.60
   3   3  13    3.78    0.73
  -4   4  13    4.67    0.72
  -3   4  13   14.34    1.04
  -2   4  13   80.28    1.33
  -1   4  13   36.06    0.60
   0   4  13  126.92    0.91
   1   4  13    5.32    0.43
   2   4  13   19.16    0.64
   3   4  13   40.84    1.40
  -3   5  13   22.63    1.15
  -2   5  13  105.43    1.50
  -1   5  13    9.91    0.63
   0   5  13   87.17    0.83
   1   5  13  114.73    1.03
   2   5  13   31.60    0.78
   3   5  13   13.31    1.20
  -2   6  13  103.70    1.51
   0   6  13   63.20    1.13
   1   6  13   53.56    0.85
   2   6  13   46.15    0.93
   3   6  13   53.10    1.62
  -3   7  13   12.06    1.28
  -2   7  13  106.39    1.54
   0   7  13  210.28    1.98
   1   7  13   51.36    1.30
   2   7  13   32.03    0.91
   3   7  13   47.95    1.63
  -3   8  13   16.49    1.42
  -2   8  13   47.69    1.35
   0   8  13   48.03    1.27
   1   8  13   56.02    1.45
   2   8  13   18.28    0.93
   3   8  13   33.88    1.56
  -3   9  13    1.06    0.94
  -2   9  13   36.35    1.38
  -1   9  13    9.24    0.89
   0   9  13   77.96    1.59
   1   9  13   -0.99    0.87
   2   9  13    6.08    0.71
  -2  10  13    7.72    0.93
   0  10  13   12.63    1.18
   1  10  13    8.42    1.19
   2  10  13   -0.44    1.13
  -2  11  13    6.59    0.96
  -1  11  13    3.15    0.87
   0  11  13   10.88    1.24
   1  11  13    8.14    1.29
   2  11  13   -1.84    1.25
  -1  12  13   12.98    1.40
   0  12  13    7.91    1.24
   1  12  13    8.26    1.37
   0  13  13    1.46    1.22
  -1 -12  14   26.14    1.37
   0 -12  14    5.22    0.89
  -1 -11  14    1.91    0.69
   0 -11  14   24.64    1.35
   1 -11  14   61.57    1.68
  -1 -10  14   63.73    1.53
   0 -10  14   35.58    1.33
   1 -10  14    0.66    0.71
   2 -10  14    5.13    0.93
  -1  -9  14   10.71    1.04
   0  -9  14   91.41    1.66
   1  -9  14  127.41    1.92
   2  -9  14   -0.72    0.73
   3  -9  14   42.96    1.65
  -2  -8  14  159.25    1.89
  -1  -8  14  141.35    1.79
   0  -8  14  197.99    2.08
   1  -8  14    0.66    0.60
   2  -8  14    0.67    0.72
   3  -8  14   64.28    1.79
  -2  -7  14   72.76    1.40
  -1  -7  14   47.85    0.95
   0  -7  14   47.08    1.17
   1  -7  14  160.49    1.92
   2  -7  14   27.46    1.28
   3  -7  14   42.23    1.63
  -3  -6  14   19.33    1.21
  -2  -6  14  113.73    1.60
  -1  -6  14   12.55    0.53
   0  -6  14  145.35    1.64
   1  -6  14    3.85    0.62
   2  -6  14   53.23    1.43
   3  -6  14   39.69    1.54
  -3  -5  14    5.43    0.83
  -2  -5  14   43.44    1.12
  -1  -5  14   80.40    0.84
   0  -5  14    6.85    0.45
   1  -5  14   65.75    1.26
   2  -5  14   82.68    1.58
   3  -5  14    1.85    0.77
  -3  -4  14   38.67    1.32
  -2  -4  14    3.19    0.60
  -1  -4  14    0.08    0.28
   0  -4  14   90.27    0.83
   1  -4  14    7.28    0.78
   2  -4  14   90.56    1.55
   3  -4  14    5.65    0.84
  -4  -3  14    3.53    1.12
  -3  -3  14   64.98    1.52
  -2  -3  14   24.34    0.93
  -1  -3  14  167.65    1.34
   0  -3  14   43.73    0.69
   1  -3  14   12.14    0.85
   2  -3  14   57.46    1.32
   3  -3  14   -0.40    0.67
  -4  -2  14   -2.40    0.92
  -3  -2  14  197.73    2.28
  -2  -2  14   12.10    0.80
  -1  -2  14    3.43    0.34
   0  -2  14  283.02    1.95
   1  -2  14  111.36    1.43
   2  -2  14  260.03    2.29
   3  -2  14    1.04    0.70
  -4  -1  14   -2.26    0.95
  -3  -1  14  195.42    2.27
  -2  -1  14   57.46    1.17
  -1  -1  14  998.50    2.36
   0  -1  14  291.07    1.96
   1  -1  14    7.98    0.76
   2  -1  14  114.20    1.64
   3  -1  14    1.40    0.73
  -4   0  14   -1.56    0.90
  -3   0  14  559.04    3.61
  -2   0  14   12.57    0.79
  -1   0  14   59.67    0.70
   0   0  14  390.66    2.16
   1   0  14  197.61    1.82
   2   0  14  648.12    3.50
   3   0  14    1.55    0.69
  -4   1  14   -1.50    0.90
  -3   1  14  194.28    2.25
  -2   1  14   58.29    1.20
  -1   1  14  988.06    2.31
   0   1  14  279.51    1.85
   1   1  14    7.30    0.69
   2   1  14  112.78    1.61
   3   1  14    1.05    0.70
  -4   2  14   -0.25    0.93
  -3   2  14  203.34    2.31
  -2   2  14   12.23    0.81
  -1   2  14    3.10    0.31
   0   2  14  276.99    1.85
   1   2  14  111.64    1.39
   2   2  14  259.65    2.27
   3   2  14    1.08    0.69
  -4   3  14    4.21    1.08
  -3   3  14   67.86    1.56
  -2   3  14   26.22    0.96
  -1   3  14  171.49    1.14
   0   3  14   48.02    0.96
   1   3  14   11.52    0.79
   2   3  14   55.95    1.29
   3   3  14   -0.56    0.65
  -4   4  14   -0.96    0.94
  -3   4  14   41.99    1.35
  -2   4  14    3.72    0.63
  -1   4  14   -0.03    0.28
   0   4  14   97.75    1.27
   1   4  14    5.80    0.58
   2   4  14   90.93    1.55
   3   4  14    5.49    0.82
  -3   5  14    8.04    0.91
  -2   5  14   48.77    1.19
  -1   5  14   85.66    1.12
   0   5  14    8.59    0.50
   1   5  14   66.83    1.27
   2   5  14   78.84    1.51
   3   5  14    1.43    0.75
  -3   6  14   24.16    1.36
  -2   6  14  123.16    1.69
  -1   6  14   12.29    0.72
   0   6  14  147.39    1.12
   1   6  14    4.09    0.45
   2   6  14   51.86    1.41
   3   6  14   37.88    1.53
  -3   7  14    0.89    0.83
  -2   7  14   78.97    1.45
   0   7  14   47.19    1.15
   1   7  14  165.42    1.37
   2   7  14   26.96    1.25
   3   7  14   43.24    1.61
  -3   8  14   -0.61    0.87
  -1   8  14  145.28    1.82
   0   8  14  194.71    2.09
   1   8  14   -0.71    0.78
   2   8  14   -0.46    0.66
   3   8  14   67.44    1.89
  -2   9  14   33.25    1.33
  -1   9  14   11.88    0.93
   0   9  14   89.72    1.68
   1   9  14  121.21    1.98
   2   9  14    0.05    0.70
  -2  10  14   77.55    1.77
   0  10  14   33.24    1.42
   1  10  14   -1.26    0.97
   2  10  14    5.45    0.92
  -2  11  14    2.56    0.89
  -1  11  14    5.21    0.97
   0  11  14   21.91    1.44
   1  11  14   56.66    1.92
  -1  12  14   30.55    1.58
   0  12  14    5.91    1.19
   0  13  14    4.92    1.34
  -1 -11  15    3.66    0.78
   0 -11  15    2.90    0.78
   1 -11  15    0.70    0.79
  -1 -10  15    5.54    0.78
   0 -10  15    2.51    0.75
   1 -10  15   37.97    1.46
   2 -10  15    0.08    0.80
  -1  -9  15   65.99    1.48
   0  -9  15    1.60    0.63
   1  -9  15    5.08    0.77
   2  -9  15    1.42    0.80
  -3  -8  15   13.82    1.17
  -1  -8  15   17.78    1.01
   0  -8  15   17.86    1.05
   1  -8  15  149.44    2.01
   2  -8  15    8.16    0.94
   3  -8  15    1.86    0.90
  -3  -7  15    5.51    0.96
  -2  -7  15  121.24    1.69
  -1  -7  15  111.60    1.58
   0  -7  15   29.80    1.08
   1  -7  15   28.66    1.16
   2  -7  15    0.71    0.71
   3  -7  15   67.09    1.84
  -3  -6  15   21.67    1.24
  -2  -6  15   39.19    1.15
  -1  -6  15   15.54    0.58
   0  -6  15   38.62    1.09
   1  -6  15  213.16    2.15
   2  -6  15   12.80    1.15
   3  -6  15    9.72    1.02
  -3  -5  15   -0.88    0.79
  -2  -5  15   70.97    1.35
  -1  -5  15   46.44    0.72
   0  -5  15   32.41    0.63
   1  -5  15   50.60    1.21
   2  -5  15   17.20    1.15
   3  -5  15   36.59    1.51
  -3  -4  15   14.37    1.13
  -2  -4  15   16.61    0.93
  -1  -4  15    1.51    0.31
   0  -4  15    0.43    0.29
   1  -4  15  141.76    1.72
   2  -4  15    8.70    1.00
   3  -4  15   12.51    1.27
  -3  -3  15    0.23    0.73
  -2  -3  15   15.43    0.89
  -1  -3  15   40.32    0.66
   0  -3  15   24.27    0.57
   1  -3  15   21.74    0.95
   2  -3  15    3.55    0.66
   3  -3  15    3.43    0.80
  -3  -2  15   54.35    1.49
  -2  -2  15    2.85    0.59
  -1  -2  15   26.96    0.60
   0  -2  15    0.94    0.45
   1  -2  15   52.48    1.15
   2  -2  15   27.01    1.10
   3  -2  15    4.46    0.83
  -4  -1  15    1.26    1.01
  -3  -1  15    0.30    0.71
  -2  -1  15    5.57    0.70
  -1  -1  15   24.21    0.57
   0  -1  15   29.27    0.90
   1  -1  15    0.32    0.44
   2  -1  15    1.63    0.58
   3  -1  15   -0.06    0.73
  -4   0  15   -2.23    0.94
  -3   0  15    1.69    0.76
  -2   0  15    0.26    0.51
  -1   0  15    0.00    0.28
   0   0  15    0.99    0.41
   1   0  15    0.26    0.45
   2   0  15    0.75    0.57
   3   0  15   -1.00    0.65
  -4   1  15    0.74    1.04
  -3   1  15    0.65    0.69
  -2   1  15    4.73    0.63
  -1   1  15   24.77    0.56
   0   1  15   29.14    0.84
   1   1  15    0.60    0.43
   2   1  15    2.16    0.59
   3   1  15    0.66    0.73
  -4   2  15    4.69    1.10
  -3   2  15   53.76    1.48
  -2   2  15    3.06    0.61
  -1   2  15   26.55    0.57
   0   2  15    1.51    0.42
   1   2  15   50.85    1.10
   2   2  15   26.35    1.09
   3   2  15    4.90    0.82
  -4   3  15    5.26    1.10
  -3   3  15   -0.09    0.71
  -2   3  15   14.92    0.92
  -1   3  15   41.45    0.65
   0   3  15   27.26    0.86
   1   3  15   21.48    0.92
   2   3  15    3.22    0.62
   3   3  15    2.85    0.78
  -4   4  15   20.15    1.53
  -3   4  15   18.73    1.17
  -2   4  15   17.09    0.95
  -1   4  15    1.47    0.32
   0   4  15    0.57    0.41
   1   4  15  139.67    1.66
   2   4  15    7.41    0.76
   3   4  15   12.39    1.22
  -3   5  15    0.88    0.75
  -2   5  15   76.49    1.47
  -1   5  15   49.17    0.97
   0   5  15   34.13    0.98
   1   5  15   50.77    1.22
   2   5  15   15.36    1.09
   3   5  15   36.38    1.49
  -3   6  15   27.66    1.33
  -2   6  15   43.44    1.24
  -1   6  15   16.82    0.80
   0   6  15   39.05    1.09
   1   6  15  216.04    2.16
   2   6  15   10.30    1.06
   3   6  15    9.32    1.00
  -3   7  15    7.87    1.04
  -2   7  15  133.95    1.85
  -1   7  15  112.86    1.43
   0   7  15   32.05    1.08
   1   7  15   27.21    1.15
   2   7  15    1.47    0.72
   3   7  15   67.34    1.89
  -3   8  15   17.58    1.44
  -1   8  15   18.48    1.01
   1   8  15  155.77    2.08
   2   8  15    8.01    0.91
   3   8  15    0.38    0.84
  -2   9  15   37.87    1.42
  -1   9  15   63.34    1.36
   1   9  15    5.43    0.83
   2   9  15    0.08    0.77
  -2  10  15    1.87    0.84
  -1  10  15   11.64    1.02
   2  10  15    0.33    0.78
  -2  11  15    2.61    0.87
  -1  11  15    6.63    1.03
  -1 -11  16   69.36    1.71
   0 -11  16    0.60    0.75
   1 -11  16   39.47    1.58
  -1 -10  16   27.47    1.30
   0 -10  16    0.40    0.70
   1 -10  16   64.48    1.71
  -1  -9  16  159.32    2.06
   0  -9  16    5.68    0.77
   1  -9  16  111.33    1.93
   2  -9  16    0.27    0.80
  -3  -8  16   76.38    1.79
  -1  -8  16   29.62    1.16
   0  -8  16   -0.04    0.56
   1  -8  16   62.46    1.52
   2  -8  16   40.51    1.55
  -3  -7  16   -1.85    0.79
  -2  -7  16    9.02    0.93
  -1  -7  16  186.28    1.96
   0  -7  16    1.13    0.57
   1  -7  16  190.46    2.19
   2  -7  16   -0.02    0.72
   3  -7  16    0.04    0.84
  -3  -6  16   27.96    1.32
  -2  -6  16   41.65    1.22
  -1  -6  16   33.49    0.71
   0  -6  16   35.59    1.13
   1  -6  16    1.00    0.61
   2  -6  16   39.90    1.40
   3  -6  16   65.19    1.82
  -3  -5  16    8.00    1.00
  -2  -5  16   95.21    1.54
  -1  -5  16   80.45    0.90
   0  -5  16   11.05    0.54
   1  -5  16   88.47    1.53
   2  -5  16    8.91    1.07
   3  -5  16   21.96    1.45
  -3  -4  16   16.25    1.18
  -2  -4  16   50.62    1.24
  -1  -4  16   -0.12    0.30
   0  -4  16  151.88    1.77
   1  -4  16    7.85    0.89
   2  -4  16   30.49    1.24
   3  -4  16   37.13    1.55
  -3  -3  16   58.65    1.55
  -2  -3  16   90.74    1.50
  -1  -3  16    9.88    0.52
   0  -3  16    0.73    0.31
   1  -3  16   30.87    1.05
   2  -3  16  114.15    1.79
   3  -3  16   46.17    1.56
  -3  -2  16   18.14    1.19
  -2  -2  16   68.97    1.35
  -1  -2  16    1.52    0.33
   0  -2  16  780.00    3.34
   1  -2  16    2.85    0.56
   2  -2  16   15.63    1.06
   3  -2  16    7.97    0.97
  -3  -1  16  162.17    2.19
  -2  -1  16  285.51    2.43
  -1  -1  16    1.24    0.32
   0  -1  16    4.63    0.55
   1  -1  16   11.51    0.87
   2  -1  16  207.65    2.23
   3  -1  16  139.20    2.19
  -3   0  16    3.52    0.84
  -2   0  16   70.50    1.37
  -1   0  16    7.79    0.50
   0   0  16 1769.13    5.99
   1   0  16    4.67    0.60
   2   0  16    4.82    0.72
   3   0  16    4.80    0.84
  -3   1  16  166.12    2.24
  -2   1  16  290.79    2.49
  -1   1  16    2.16    0.38
   0   1  16    6.06    0.59
   1   1  16   10.37    0.84
   2   1  16  207.53    2.19
   3   1  16  140.54    2.19
  -3   2  16   21.71    1.23
  -2   2  16   71.39    1.41
  -1   2  16    1.17    0.32
   0   2  16  783.05    3.29
   1   2  16    2.10    0.51
   2   2  16   15.68    1.02
   3   2  16    8.17    0.92
  -3   3  16   60.68    1.58
  -2   3  16   96.40    1.62
  -1   3  16   10.44    0.52
   0   3  16    0.63    0.43
   1   3  16   30.65    1.02
   2   3  16  111.02    1.75
   3   3  16   48.85    1.60
  -3   4  16   20.61    1.24
  -2   4  16   54.08    1.35
  -1   4  16    0.01    0.31
   0   4  16  157.12    1.65
   1   4  16    7.32    0.66
   2   4  16   29.96    1.23
   3   4  16   37.18    1.49
  -3   5  16    9.67    1.03
  -2   5  16  103.73    1.70
  -1   5  16   86.80    0.95
   0   5  16   12.26    0.85
   1   5  16   87.24    1.50
   2   5  16    9.20    1.06
   3   5  16   24.33    1.40
  -3   6  16   33.57    1.40
  -2   6  16   48.91    1.34
  -1   6  16   35.50    0.99
   0   6  16   36.47    1.12
   1   6  16    1.42    0.59
   2   6  16   37.58    1.35
   3   6  16   64.64    1.84
  -2   7  16   12.00    1.02
  -1   7  16  199.50    2.20
   0   7  16    1.10    0.56
   1   7  16  196.62    2.25
   2   7  16    0.43    0.68
   3   7  16   -0.70    0.82
  -1   8  16   29.52    1.14
   0   8  16    0.35    0.58
   1   8  16   63.92    1.57
   2   8  16   41.90    1.53
  -2   9  16   12.00    1.21
   0   9  16    6.97    0.81
   1   9  16  114.98    2.00
   2   9  16    0.66    0.81
  -2  10  16   14.15    1.29
   1  10  16   68.66    1.79
   1  11  16   40.28    1.64
  -1 -11  17    3.49    0.79
   0 -11  17   12.84    1.34
  -1 -10  17   13.23    1.21
   0 -10  17    6.53    0.89
   1 -10  17   16.33    1.35
  -1  -9  17    6.38    0.79
   0  -9  17    0.57    0.68
   1  -9  17    8.07    0.92
   2  -9  17   27.57    1.53
  -1  -8  17   74.86    1.53
   0  -8  17   26.97    1.19
   1  -8  17    2.00    0.74
   2  -8  17    0.37    0.78
  -3  -7  17   50.73    1.59
  -2  -7  17   11.87    0.95
  -1  -7  17    1.33    0.57
   0  -7  17    0.27    0.58
   1  -7  17  106.14    1.80
   2  -7  17   42.48    1.56
   3  -7  17   -0.10    0.89
  -3  -6  17    4.57    0.91
  -2  -6  17   21.86    1.07
  -1  -6  17  244.75    2.00
   0  -6  17   12.50    0.98
   1  -6  17    6.93    0.79
   2  -6  17   -0.25    0.69
   3  -6  17   21.94    1.55
  -3  -5  17   41.29    1.47
  -2  -5  17   20.74    1.03
  -1  -5  17    6.08    0.45
   0  -5  17   27.85    0.67
   1  -5  17  121.04    1.76
   2  -5  17   76.56    1.67
   3  -5  17    0.41    0.86
  -3  -4  17   -0.42    0.81
  -2  -4  17    7.55    0.92
  -1  -4  17  279.16    1.85
   0  -4  17   14.39    0.58
   1  -4  17    0.58    0.56
   2  -4  17    0.58    0.66
   3  -4  17   28.85    1.54
  -3  -3  17   31.47    1.36
  -2  -3  17  103.74    1.66
  -1  -3  17    7.80    0.54
   0  -3  17   17.19    0.59
   1  -3  17   21.14    1.04
   2  -3  17   75.67    1.60
   3  -3  17    0.33    0.80
  -3  -2  17    1.34    0.77
  -2  -2  17   -0.48    0.58
  -1  -2  17  101.94    0.98
   0  -2  17   86.69    1.34
   1  -2  17    2.11    0.57
   2  -2  17    2.69    0.69
   3  -2  17    2.50    0.85
  -3  -1  17    5.92    0.92
  -2  -1  17   79.77    1.49
  -1  -1  17   10.95    0.55
   0  -1  17    2.27    0.51
   1  -1  17    1.87    0.58
   2  -1  17   14.03    1.14
   3  -1  17    4.32    0.87
  -3   0  17   -0.78    0.71
  -2   0  17    0.73    0.59
  -1   0  17   -0.13    0.32
   0   0  17    8.77    0.82
   1   0  17   -0.10    0.49
   2   0  17   -1.04    0.57
   3   0  17   -0.53    0.74
  -3   1  17    6.92    0.94
  -2   1  17   81.83    1.52
  -1   1  17   12.03    0.56
   0   1  17    2.32    0.51
   1   1  17    1.49    0.52
   2   1  17   13.77    1.09
   3   1  17    3.82    0.85
  -3   2  17    2.26    0.83
  -2   2  17    0.38    0.59
  -1   2  17  101.08    0.98
   0   2  17   85.77    1.30
   1   2  17    1.88    0.53
   2   2  17    1.78    0.65
   3   2  17    2.60    0.85
  -3   3  17   32.84    1.41
  -2   3  17  110.44    1.75
  -1   3  17    7.35    0.53
   0   3  17   18.06    0.88
   1   3  17   21.07    0.98
   2   3  17   75.09    1.57
   3   3  17    0.40    0.78
  -3   4  17    0.93    0.80
  -2   4  17    9.50    1.01
  -1   4  17  291.28    1.57
   0   4  17   15.58    0.88
   1   4  17   -0.04    0.54
   2   4  17    1.09    0.64
   3   4  17   28.67    1.48
  -3   5  17   49.05    1.56
  -2   5  17   25.21    1.17
  -1   5  17    5.83    0.48
   0   5  17   29.26    1.03
   1   5  17  123.92    1.78
   2   5  17   78.87    1.69
   3   5  17   -0.28    0.79
  -3   6  17    7.65    1.03
  -2   6  17   26.31    1.20
  -1   6  17  271.14    2.57
   0   6  17   14.01    0.97
   1   6  17    7.45    0.78
   2   6  17    0.31    0.69
   3   6  17   21.19    1.46
  -2   7  17   12.65    1.08
  -1   7  17    1.16    0.64
   0   7  17    0.77    0.57
   1   7  17  109.68    1.85
   2   7  17   43.23    1.51
  -1   8  17   78.59    1.60
   0   8  17   31.42    1.26
   1   8  17    1.29    0.71
   2   8  17    0.44    0.77
  -2   9  17    4.42    0.84
   0   9  17    0.36    0.65
   1   9  17    7.67    0.94
   2   9  17   27.77    1.52
  -2  10  17    4.19    0.95
   0  10  17    7.44    0.90
   1  10  17   15.59    1.35
   0  11  17   13.61    1.33
  -1 -11  18   43.74    1.73
  -1 -10  18   15.10    1.28
   0 -10  18   65.06    1.74
   1 -10  18   38.20    1.58
  -1  -9  18   57.36    1.51
   0  -9  18   33.01    1.43
   1  -9  18    3.06    0.83
  -1  -8  18    0.69    0.62
   0  -8  18   59.36    1.50
   1  -8  18   14.02    1.23
   2  -8  18   41.04    1.59
  -3  -7  18    9.22    1.14
  -2  -7  18    4.85    0.83
  -1  -7  18   80.67    1.55
   0  -7  18   10.95    1.08
   1  -7  18   26.92    1.30
   2  -7  18   13.43    1.37
  -3  -6  18   50.28    1.60
  -2  -6  18   14.35    1.04
  -1  -6  18   56.11    0.89
   0  -6  18   47.05    1.32
   1  -6  18   16.11    1.14
   2  -6  18   31.66    1.41
   3  -6  18    9.71    1.12
  -3  -5  18   -1.08    0.82
  -2  -5  18   11.48    0.97
  -1  -5  18  107.36    1.33
   0  -5  18    3.95    0.44
   1  -5  18  141.64    1.93
   2  -5  18    3.16    0.79
   3  -5  18   11.90    1.15
  -3  -4  18   20.70    1.31
  -2  -4  18  121.03    1.78
  -1  -4  18   85.83    1.16
   0  -4  18   92.29    1.72
   1  -4  18    2.66    0.68
   2  -4  18   11.50    1.16
   3  -4  18   63.38    1.86
  -3  -3  18    0.31    0.81
  -2  -3  18  103.38    1.69
  -1  -3  18   67.81    0.89
   0  -3  18   82.53    1.43
   1  -3  18  212.75    2.19
   2  -3  18    6.05    0.80
   3  -3  18   29.68    1.53
  -3  -2  18    1.72    0.88
  -2  -2  18  283.43    2.55
  -1  -2  18   47.04    0.79
   0  -2  18  105.85    1.50
   1  -2  18    0.10    0.58
   2  -2  18   -0.43    0.65
   3  -2  18  105.67    2.13
  -3  -1  18    1.52    0.81
  -2  -1  18   54.65    1.37
  -1  -1  18    2.04    0.38
   0  -1  18   27.43    1.00
   1  -1  18  376.54    2.85
   2  -1  18   10.96    1.17
   3  -1  18   17.95    1.41
  -3   0  18    1.68    0.89
  -2   0  18  367.20    2.91
  -1   0  18   66.90    0.88
   0   0  18   58.55    1.20
   1   0  18    1.45    0.57
   2   0  18    1.55    0.65
   3   0  18   88.58    1.97
  -3   1  18    2.05    0.87
  -2   1  18   53.20    1.40
  -1   1  18    2.23    0.38
   0   1  18   29.22    1.02
   1   1  18  365.56    2.74
   2   1  18    8.94    1.11
   3   1  18   17.65    1.38
  -3   2  18    1.78    0.83
  -2   2  18  282.46    2.65
  -1   2  18   45.05    0.77
   0   2  18  109.20    1.50
   1   2  18    0.75    0.53
   2   2  18    0.05    0.64
   3   2  18  107.34    2.14
  -3   3  18    0.66    0.81
  -2   3  18  108.45    1.83
  -1   3  18   67.02    0.91
   0   3  18   86.59    1.37
   1   3  18  212.87    2.16
   2   3  18    7.10    0.83
   3   3  18   32.37    1.57
  -3   4  18   23.53    1.37
  -2   4  18  132.93    1.99
  -1   4  18   90.52    1.60
   0   4  18   97.59    1.47
   1   4  18    2.24    0.63
   2   4  18   11.13    1.12
   3   4  18   61.16    1.82
  -3   5  18   -0.25    0.82
  -2   5  18   10.91    1.10
  -1   5  18  112.74    1.78
   0   5  18    3.91    0.61
   1   5  18  141.48    1.92
   2   5  18    2.99    0.76
   3   5  18   11.04    1.35
  -3   6  18   57.10    1.70
  -2   6  18   19.48    1.21
  -1   6  18   59.76    1.45
   0   6  18   49.51    1.27
   1   6  18   15.06    1.10
   2   6  18   33.15    1.41
  -2   7  18    6.42    0.91
  -1   7  18   83.75    1.66
   0   7  18   11.02    1.04
   1   7  18   28.82    1.31
   2   7  18   14.22    1.28
  -1   8  18    1.22    0.69
   0   8  18   61.92    1.51
   1   8  18   12.85    1.24
   2   8  18   45.53    1.64
  -2   9  18    9.23    1.14
   0   9  18   33.34    1.39
   1   9  18    2.91    0.84
  -2  10  18    1.44    0.94
   0  10  18   69.19    1.73
   1  10  18   39.08    1.65
   0  11  18   77.06    1.87
  -1 -10  19   20.82    1.37
   0 -10  19    3.77    0.86
  -1  -9  19    1.13    0.68
   0  -9  19   30.11    1.46
   1  -9  19    1.76    0.84
  -1  -8  19    2.53    0.70
   0  -8  19   12.15    1.17
   1  -8  19    1.68    0.80
   2  -8  19   16.49    1.42
  -2  -7  19   -1.73    0.69
  -1  -7  19   49.14    1.37
   0  -7  19   59.36    1.51
   1  -7  19    0.59    0.72
   2  -7  19    2.94    0.89
  -3  -6  19   50.47    1.88
  -2  -6  19   30.51    1.22
  -1  -6  19   -0.45    0.40
   0  -6  19    5.17    0.74
   1  -6  19   28.40    1.31
   2  -6  19   80.26    1.84
  -3  -5  19    0.50    0.89
  -2  -5  19    7.35    0.87
  -1  -5  19   98.26    1.09
   0  -5  19  166.81    1.89
   1  -5  19    1.61    0.69
   2  -5  19   20.61    1.32
   3  -5  19    7.98    1.09
  -3  -4  19   63.58    1.72
  -2  -4  19   46.03    1.35
  -1  -4  19    2.29    0.42
   0  -4  19    9.56    0.61
   1  -4  19   94.96    1.73
   2  -4  19   87.01    1.83
   3  -4  19    5.33    1.01
  -3  -3  19    1.88    0.88
  -2  -3  19    8.76    0.88
  -1  -3  19   43.83    0.81
   0  -3  19  107.19    2.14
   1  -3  19   37.50    1.28
   2  -3  19   45.51    1.48
   3  -3  19    4.57    0.96
  -3  -2  19   17.82    1.27
  -2  -2  19   38.88    1.27
  -1  -2  19   20.98    0.69
   0  -2  19   12.66    0.94
   1  -2  19   16.16    1.09
   2  -2  19   31.78    1.36
   3  -2  19    1.66    0.91
  -3  -1  19    0.30    0.80
  -2  -1  19    0.48    0.65
  -1  -1  19    5.20    0.45
   0  -1  19    9.29    0.92
   1  -1  19   33.12    1.25
   2  -1  19    8.64    0.91
   3  -1  19   -0.75    0.80
  -3   0  19   -0.64    0.81
  -2   0  19    0.38    0.65
  -1   0  19   -0.05    0.36
   0   0  19    0.12    0.54
   1   0  19   -0.43    0.54
   2   0  19   -0.98    0.63
   3   0  19   -1.08    0.85
  -3   1  19    0.83    0.83
  -2   1  19    0.38    0.68
  -1   1  19    4.88    0.45
   0   1  19    8.39    0.85
   1   1  19   35.22    1.24
   2   1  19    7.97    0.90
   3   1  19   -0.76    0.81
  -3   2  19   19.22    1.35
  -2   2  19   39.56    1.32
  -1   2  19   20.69    1.04
   0   2  19   12.41    0.92
   1   2  19   15.70    1.05
   2   2  19   30.44    1.32
   3   2  19    1.70    0.91
  -3   3  19    3.60    0.92
  -2   3  19    8.94    1.10
  -1   3  19   44.80    1.28
   0   3  19  115.16    1.61
   1   3  19   36.81    1.26
   2   3  19   46.79    1.48
   3   3  19    2.72    0.91
  -3   4  19   73.25    1.85
  -2   4  19   54.57    1.54
  -1   4  19    2.92    0.70
   0   4  19   10.46    0.94
   1   4  19   96.31    1.68
   2   4  19   85.40    1.77
   3   4  19    4.70    0.97
  -3   5  19    2.75    0.94
  -2   5  19    9.68    1.01
  -1   5  19  103.30    1.79
   0   5  19  179.69    2.00
   1   5  19    1.42    0.67
   2   5  19   21.92    1.30
  -3   6  19   58.32    1.75
  -2   6  19   39.31    1.46
  -1   6  19    1.23    0.70
   0   6  19    6.32    0.73
   1   6  19   26.95    1.27
   2   6  19   83.56    1.87
  -2   7  19    0.40    0.80
  -1   7  19   54.99    1.50
   0   7  19   61.47    1.47
   1   7  19   -0.31    0.66
   2   7  19    3.40    0.86
  -1   8  19    3.43    0.80
   0   8  19   11.26    1.17
   1   8  19    1.95    0.79
   2   8  19   16.18    1.41
   0   9  19   30.82    1.42
   1   9  19    2.04    0.83
   0  10  19    3.91    0.86
   0  11  19   22.04    1.49
  -1 -10  20   11.63    1.30
  -1  -9  20    1.03    0.70
   0  -9  20    2.32    0.81
   1  -9  20    2.04    0.86
  -1  -8  20   -0.04    0.65
   0  -8  20   80.78    1.76
   1  -8  20    2.36    0.85
  -2  -7  20   36.91    1.47
  -1  -7  20   14.87    1.13
   0  -7  20    1.86    0.73
   1  -7  20    1.98    0.80
   2  -7  20    9.66    1.06
  -2  -6  20    7.50    0.92
  -1  -6  20    3.62    0.49
   0  -6  20   87.85    1.69
   1  -6  20    0.84    0.74
   2  -6  20   41.51    1.62
  -2  -5  20   31.50    1.27
  -1  -5  20  135.55    1.27
   0  -5  20    1.08    0.44
   1  -5  20   50.70    1.50
   2  -5  20   11.32    1.34
  -3  -4  20   54.70    1.70
  -2  -4  20   30.11    1.24
  -1  -4  20   68.31    0.97
   0  -4  20   78.31    1.96
   1  -4  20   69.92    1.61
   2  -4  20   73.20    1.81
   3  -4  20   24.75    1.61
  -3  -3  20   -0.38    0.86
  -2  -3  20    0.12    0.69
  -1  -3  20  271.33    2.49
   0  -3  20    6.62    0.54
   1  -3  20  210.02    2.33
   2  -3  20    2.62    0.78
   3  -3  20    0.03    0.89
  -3  -2  20  100.21    2.03
  -2  -2  20   45.38    1.38
  -1  -2  20   83.43    1.04
   0  -2  20    0.43    0.40
   1  -2  20   95.02    1.74
   2  -2  20   43.23    1.53
   3  -2  20   21.22    1.57
  -3  -1  20    4.20    0.95
  -2  -1  20    4.39    0.83
  -1  -1  20  238.47    1.55
   0  -1  20   12.50    1.02
   1  -1  20  204.10    2.29
   2  -1  20   -0.38    0.70
   3  -1  20    2.64    0.95
  -3   0  20  136.11    2.28
  -2   0  20   38.39    1.36
  -1   0  20    6.88    0.79
   0   0  20   40.93    1.23
   1   0  20   29.30    1.23
   2   0  20   33.38    1.38
   3   0  20   15.72    1.56
  -3   1  20    4.26    1.02
  -2   1  20    4.03    0.80
  -1   1  20  239.64    2.43
   0   1  20   12.68    0.95
   1   1  20  205.20    2.28
   2   1  20   -0.25    0.70
   3   1  20    2.70    0.95
  -3   2  20  110.26    2.15
  -2   2  20   46.53    1.45
  -1   2  20   83.15    1.62
   0   2  20   -0.18    0.56
   1   2  20   95.40    1.68
   2   2  20   44.59    1.48
   3   2  20   19.84    1.52
  -3   3  20    1.16    0.89
  -2   3  20   -0.64    0.74
  -1   3  20  277.92    2.67
   0   3  20    6.76    0.70
   1   3  20  216.61    2.33
   2   3  20    1.81    0.75
   3   3  20   -0.54    0.88
  -3   4  20   59.70    1.80
  -2   4  20   34.00    1.42
  -1   4  20   72.81    1.60
   0   4  20   85.18    1.53
   1   4  20   70.37    1.58
   2   4  20   72.09    1.76
  -3   5  20    6.48    1.06
  -2   5  20   37.95    1.51
  -1   5  20  147.31    2.12
   0   5  20    1.17    0.60
   1   5  20   48.53    1.46
   2   5  20   12.48    1.26
  -3   6  20   11.01    1.35
  -2   6  20   10.15    1.24
  -1   6  20    5.75    0.86
   0   6  20   92.58    1.68
   1   6  20    0.31    0.69
   2   6  20   43.09    1.60
  -2   7  20   48.81    1.65
  -1   7  20   16.51    1.20
   0   7  20    2.29    0.70
   1   7  20    1.60    0.76
   2   7  20   11.78    1.38
  -1   8  20    0.32    0.75
   0   8  20   83.90    1.75
   1   8  20    1.85    0.80
   0   9  20    1.99    0.81
   1   9  20    1.34    0.86
   0  10  20  117.64    2.18
  -1  -9  21    2.44    0.75
   0  -9  21   11.50    1.30
  -1  -8  21    6.85    0.83
   0  -8  21   11.85    1.25
   1  -8  21   17.80    1.39
  -1  -7  21    5.22    0.78
   0  -7  21   19.28    1.31
   1  -7  21    8.84    0.99
  -2  -6  21   18.74    1.20
  -1  -6  21   33.61    1.27
   0  -6  21   23.08    1.27
   1  -6  21   21.85    1.34
   2  -6  21    7.44    1.01
  -2  -5  21   52.86    1.49
  -1  -5  21    7.02    0.55
   0  -5  21   95.90    1.75
   1  -5  21   19.73    1.25
   2  -5  21   31.81    1.56
  -2  -4  21   32.98    1.30
  -1  -4  21   99.32    1.82
   0  -4  21   35.20    0.84
   1  -4  21   16.10    1.23
   2  -4  21    7.54    1.01
  -2  -3  21   36.39    1.34
  -1  -3  21    1.19    0.46
   0  -3  21   92.04    1.85
   1  -3  21    9.25    1.14
   2  -3  21   26.29    1.45
  -3  -2  21    1.44    0.95
  -2  -2  21   14.05    1.13
  -1  -2  21   11.25    0.99
   0  -2  21   29.94    0.86
   1  -2  21    1.51    0.70
   2  -2  21   -0.35    0.76
   3  -2  21   16.62    1.57
  -3  -1  21    2.35    0.93
  -2  -1  21    1.69    0.77
  -1  -1  21    0.78    0.67
   0  -1  21    7.22    0.77
   1  -1  21    0.37    0.65
   2  -1  21    0.88    0.75
   3  -1  21   -0.19    0.92
  -3   0  21   -0.99    0.89
  -2   0  21    0.04    0.72
  -1   0  21    0.28    0.65
   0   0  21   -0.34    0.59
   1   0  21   -0.80    0.62
   2   0  21   -1.38    0.72
  -3   1  21    2.29    0.99
  -2   1  21    2.43    0.80
  -1   1  21    0.90    0.67
   0   1  21    6.53    0.71
   1   1  21   -0.16    0.65
   2   1  21    0.88    0.75
   3   1  21    0.64    0.89
  -3   2  21    1.02    0.98
  -2   2  21   15.18    1.20
  -1   2  21   11.78    1.07
   0   2  21   30.78    1.20
   1   2  21    0.98    0.71
   2   2  21    0.01    0.78
  -3   3  21   19.55    1.46
  -2   3  21   39.48    1.50
  -1   3  21    2.84    0.78
   0   3  21   97.72    1.64
   1   3  21    8.57    0.85
   2   3  21   26.52    1.44
  -2   4  21   38.31    1.51
  -1   4  21  109.12    1.94
   0   4  21   36.62    1.26
   1   4  21   17.17    1.19
   2   4  21    7.64    0.97
  -2   5  21   61.95    1.76
  -1   5  21    9.39    1.13
   0   5  21   98.48    1.70
   1   5  21   19.56    1.26
   2   5  21   33.10    1.51
  -2   6  21   25.70    1.49
  -1   6  21   39.64    1.45
   0   6  21   23.32    1.24
   1   6  21   24.26    1.36
   2   6  21    6.36    0.97
  -2   7  21   25.13    1.46
  -1   7  21    6.91    0.97
   0   7  21   21.06    1.27
   1   7  21    9.18    0.99
  -1   8  21    8.15    1.03
   0   8  21   12.47    1.25
   1   8  21   18.76    1.42
   0   9  21   10.62    1.27
   0  10  21    4.54    0.95
   0  -8  22    4.63    0.88
  -1  -7  22   16.07    1.28
   0  -7  22   -0.12    0.74
   1  -7  22   51.39    1.69
  -2  -6  22   11.47    1.15
   0  -6  22   33.32    1.40
   1  -6  22   12.73    1.33
  -2  -5  22    6.01    0.95
  -1  -5  22   71.55    1.53
   0  -5  22    1.84    0.73
   1  -5  22   44.13    1.54
   2  -5  22   10.87    1.12
  -2  -4  22    5.67    0.91
  -1  -4  22    1.40    0.70
   0  -4  22  126.22    1.88
   1  -4  22   17.62    1.30
   2  -4  22   75.32    1.96
  -2  -3  22   38.24    1.42
  -1  -3  22  148.64    1.98
   0  -3  22   44.31    1.17
   1  -3  22    9.67    0.94
   2  -3  22   53.10    1.70
  -2  -2  22    1.19    0.79
  -1  -2  22    8.53    0.95
   0  -2  22  152.84    1.84
   1  -2  22   10.06    1.14
   2  -2  22  122.81    2.24
  -2  -1  22   62.41    1.64
  -1  -1  22  156.54    2.13
   0  -1  22   12.55    1.14
   1  -1  22    6.90    0.86
   2  -1  22   33.38    1.53
  -2   0  22   11.78    1.20
  -1   0  22    1.38    0.71
   0   0  22  137.25    1.86
   1   0  22    9.79    1.21
   2   0  22   92.95    2.05
  -2   1  22   62.50    1.67
  -1   1  22  154.29    2.14
   0   1  22   10.36    1.05
   1   1  22    5.99    0.82
   2   1  22   32.60    1.48
  -2   2  22    1.62    0.85
  -1   2  22    7.13    0.94
   0   2  22  158.60    1.98
   1   2  22    9.65    0.94
   2   2  22  122.51    2.20
  -2   3  22   41.33    1.55
  -1   3  22  166.16    2.31
   0   3  22   45.75    1.37
   1   3  22    9.61    1.17
   2   3  22   55.70    1.72
  -2   4  22    5.92    1.06
  -1   4  22    2.32    0.82
   0   4  22  135.20    1.93
   1   4  22   17.25    1.26
   2   4  22   79.78    1.93
  -2   5  22    6.38    1.09
  -1   5  22   82.41    1.84
   0   5  22    2.78    0.72
   1   5  22   44.43    1.52
   2   5  22   11.27    1.40
  -2   6  22   15.93    1.41
  -1   6  22   22.15    1.36
   0   6  22   35.26    1.38
   1   6  22   14.20    1.31
  -2   7  22    1.94    0.97
  -1   7  22   21.22    1.38
   0   7  22    0.38    0.72
   1   7  22   55.75    1.74
  -1   8  22   11.07    1.15
   0   8  22    5.52    0.89
   1   8  22    0.10    0.82
   0   9  22   10.09    1.05
   0  -8  23    2.12    0.84
   0  -7  23   15.48    1.35
   1  -7  23    1.63    0.93
  -2  -6  23    1.34    0.87
   0  -6  23    3.48    0.82
   1  -6  23   63.93    1.78
  -2  -5  23   30.01    1.37
  -1  -5  23   74.05    1.61
   0  -5  23   42.80    1.49
   1  -5  23   -0.50    0.78
  -2  -4  23   11.54    1.12
  -1  -4  23   22.13    1.16
   0  -4  23   30.92    0.88
   1  -4  23   70.08    1.76
   2  -4  23   18.32    1.50
  -2  -3  23   33.05    1.42
  -1  -3  23   45.09    1.41
   0  -3  23   15.87    0.78
   1  -3  23    9.87    0.96
   2  -3  23   13.36    1.43
  -2  -2  23   13.93    1.22
  -1  -2  23    1.16    0.76
   0  -2  23   42.23    0.93
   1  -2  23   22.28    1.32
   2  -2  23    1.42    0.87
  -2  -1  23    3.78    0.91
  -1  -1  23    6.16    0.91
   0  -1  23    0.38    0.49
   1  -1  23    6.47    0.89
   2  -1  23   11.03    1.09
  -2   0  23    0.15    0.81
  -1   0  23    0.61    0.73
   0   0  23   -0.01    0.63
   1   0  23   -1.26    0.72
   2   0  23   -0.93    0.85
  -2   1  23    4.05    1.00
  -1   1  23    6.00    0.91
   0   1  23   -0.79    0.65
   1   1  23    5.33    0.86
   2   1  23   11.64    1.36
  -2   2  23   14.79    1.32
  -1   2  23    1.26    0.78
   0   2  23   43.55    1.37
   1   2  23   19.76    1.33
   2   2  23    1.47    0.88
  -2   3  23   36.35    1.58
  -1   3  23   56.71    1.66
   0   3  23   16.93    1.22
   1   3  23   10.84    1.26
   2   3  23   14.21    1.48
  -2   4  23   11.32    1.19
  -1   4  23   28.52    1.43
   0   4  23   33.00    1.36
   1   4  23   72.93    1.75
   2   4  23   19.48    1.49
  -2   5  23   34.66    1.62
  -1   5  23   88.58    1.97
   0   5  23   43.59    1.48
   1   5  23    0.34    0.78
  -2   6  23    1.79    1.06
  -1   6  23   13.76    1.33
   0   6  23    3.41    0.80
   1   6  23   70.09    1.84
  -1   7  23   25.73    1.50
   0   7  23   14.00    1.29
   1   7  23    1.75    0.86
  -1   8  23   17.77    1.46
   0   8  23    1.50    0.83
   0  -7  24   -0.04    0.79
   0  -6  24   39.91    1.54
   1  -6  24   15.80    1.46
  -1  -5  24   16.28    1.17
   0  -5  24    1.18    0.78
   1  -5  24   21.26    1.46
  -2  -4  24   41.34    1.53
  -1  -4  24    0.27    0.74
   0  -4  24  101.96    1.46
   1  -4  24   -0.56    0.76
  -2  -3  24   92.55    1.95
  -1  -3  24    5.42    0.91
   0  -3  24    6.53    0.61
   1  -3  24   16.82    1.35
  -2  -2  24   43.65    1.57
  -1  -2  24   -1.16    0.74
   0  -2  24  187.63    2.87
   1  -2  24   11.22    1.27
   2  -2  24    6.71    1.02
  -2  -1  24  140.63    2.33
  -1  -1  24    1.81    0.82
   0  -1  24    2.00    0.53
   1  -1  24   19.97    1.42
   2  -1  24   66.86    1.92
  -2   0  24   29.65    1.48
  -1   0  24    4.97    0.95
   0   0  24  237.69    2.52
   1   0  24   10.97    1.30
   2   0  24    6.22    1.03
  -2   1  24  150.89    2.42
  -1   1  24    0.47    0.84
   0   1  24    0.68    0.75
   1   1  24   20.10    1.33
   2   1  24   65.68    1.85
  -2   2  24   47.01    1.67
  -1   2  24   -0.76    0.81
   0   2  24  203.30    2.35
   1   2  24   14.15    1.29
   2   2  24    6.69    1.01
  -2   3  24  106.39    2.20
  -1   3  24    5.29    1.01
   0   3  24    6.64    0.88
   1   3  24   19.62    1.42
  -2   4  24   46.69    1.95
  -1   4  24    1.36    0.94
   0   4  24  114.45    1.97
   1   4  24    0.03    0.79
  -1   5  24   18.23    1.43
   0   5  24    2.03    0.77
   1   5  24   21.77    1.45
  -1   6  24    5.40    1.03
   0   6  24   42.53    1.56
   1   6  24   13.85    1.41
   0   7  24   -0.31    0.78
   0  -6  25   32.11    1.51
  -1  -5  25   -1.04    0.77
   0  -5  25    0.40    0.78
  -1  -4  25   18.77    1.21
   0  -4  25   33.18    0.98
   1  -4  25   -0.37    0.84
  -1  -3  25    2.05    0.84
   0  -3  25    0.44    0.52
   1  -3  25   28.22    1.53
  -1  -2  25    5.28    1.01
   0  -2  25    7.67    0.69
   1  -2  25    2.60    0.88
  -1  -1  25    2.92    0.90
   0  -1  25    2.61    0.55
   1  -1  25    7.34    1.01
  -1   0  25   -0.52    0.80
   0   0  25    1.18    0.67
   1   0  25   -0.36    0.78
  -1   1  25    2.74    0.89
   0   1  25    1.60    0.79
   1   1  25    9.27    1.05
  -1   2  25    6.09    0.99
   0   2  25    5.90    0.86
   1   2  25    1.76    0.84
  -1   3  25    2.03    0.93
   0   3  25   -1.33    0.71
   1   3  25   31.96    1.59
  -1   4  25   23.42    1.50
   0   4  25   36.32    1.54
   1   4  25   -1.44    0.78
  -1   5  25    0.91    0.94
   0   5  25   -0.41    0.76
   1   5  25   12.85    1.43
   0  -5  26   -0.17    0.80
  -1  -4  26    5.83    0.96
   0  -4  26   16.86    1.39
  -1  -3  26    6.72    1.00
   0  -3  26    2.98    0.60
   1  -3  26   78.58    2.02
  -1  -2  26   84.18    1.88
   0  -2  26   21.45    0.94
   1  -2  26    0.20    0.89
  -1  -1  26   10.02    1.15
   0  -1  26   39.81    1.05
   1  -1  26  212.93    2.78
  -1   0  26  125.09    2.25
   0   0  26   31.47    1.02
   1   0  26   -0.74    0.84
  -1   1  26   11.07    1.19
   0   1  26   38.99    1.50
   1   1  26  222.48    2.86
  -1   2  26   87.64    2.04
   0   2  26   19.23    1.43
   1   2  26    1.47    0.87
  -1   3  26    7.63    1.20
   0   3  26    1.44    0.81
   1   3  26   76.37    1.92
   0   4  26   18.62    1.40
   0  -4  27    6.68    0.98
   0  -3  27   11.36    0.89
   0  -2  27    3.38    0.64
   0  -1  27    2.41    0.61
   0   0  27   -0.42    0.56
   0   1  27    3.29    0.69
   0   2  27    1.04    0.92
   0  -2  28   -0.22    0.82
   0  -1  28   -0.81    0.82
   0   0  28   -0.05    0.84
   0   0   0    0.00    0.00
;
_shelx_hkl_checksum   65080
